# Supplementary material for: Chiral strong Brønsted acid-catalyzed enantioselective addition reaction of simple olefins with ethyl glyoxylate
Source: Royal Society of Chemistry journal article supplement (doi:10.1039/d0qo00448k), 2020-01-01
Supplement: d0qo00448k1.pdf [file d0qo00448k1.pdf]

## Electronic Supplementary Information

### Chiral Strong Brønsted Acid-Catalyzed Enantioselective Addition Reaction of Simple Olefins with Ethyl Glyoxylate

Jun Kikuchi,<sup>a</sup> Yuki Aizawa,<sup>a</sup> Masahiro Terada<sup>\* a</sup>

e-mail: mterada@tohoku.ac.jp

<sup>a</sup> *Department of Chemistry, Graduate School of Science, Tohoku University,  
Sendai 980-8578, Japan*

#### Contents:

1. General Information
2. Preparation of Catalysts
3. Enantioselective Addition Reaction of Simple Olefins with Ethyl Glyoxylate
4. Additional Screening
5. Determination of absolute configuration
6. NMR Spectra
7. HPLC Charts

## 1. General Information

Unless otherwise noted, all reactions were carried out under an atmosphere of standard grade nitrogen gas in flame-dried glassware equipped with a magnetic stir bar. Toluene and tetrahydrofuran (THF) were supplied from KANTO Chemical Co., Inc. as “Dehydrated solvent system”. Other solvents and reagents were purchased from commercial suppliers and used without further purification. Flash column chromatography was performed on silica gel 60N (spherical, neutral, 40-50  $\mu\text{m}$ ; Kanto Chemical Co., Inc.). Analytical thin layer chromatography (TLC) was performed on Merck precoated TLC plates (silica gel 60 GF<sub>254</sub>, 0.25 mm). <sup>1</sup>H NMR spectra were recorded on a JEOL JNM-ECA600 (600 MHz) spectrometer. Chemical shifts are reported in ppm from the solvent resonance or tetramethylsilane (TMS) as the internal standard (CDCl<sub>3</sub>: 7.26 ppm, TMS: 0.00 ppm, CD<sub>3</sub>OD: 3.31 ppm, acetone-*d*<sub>6</sub>: 2.05 ppm). Data are reported as follows: chemical shift, multiplicity (s = singlet, d = doublet, t = triplet, br = broad, m = multiplet), coupling constants (Hz) and integration. <sup>13</sup>C NMR spectra were recorded on a JEOL JNM-ECA600 (151 MHz) spectrometer with complete proton decoupling. Chemical shifts are reported in ppm from the solvent resonance as the internal standard (CDCl<sub>3</sub> 77.0 ppm). <sup>31</sup>P NMR spectra were recorded on JEOL JNM-ECA-600 (243 MHz) spectrometer with complete proton decoupling. <sup>19</sup>F NMR spectra were recorded on JEOL JNM-ECA-600 (565 MHz) spectrometer. Optical rotations were measured on a Jasco P-1020 digital polarimeter with a sodium lamp and reported as follows;  $[\alpha]_D^{25}$  (*c* = g/100 mL, solvent, % ee). Infrared spectra were recorded on a Jasco FT/IR-4100 spectrometer. HPLC analysis was performed on a Jasco LC-2000 Plus system with UV and CD detectors. High resolution mass spectra analysis was performed on a Bruker Daltonics solariX 9.4T FT-ICR-MS spectrometer at the Research and Analytical Center for Giant Molecules, Graduate School of Science, Tohoku University.

## 2. Preparation of Catalysts

### Preparation of S2

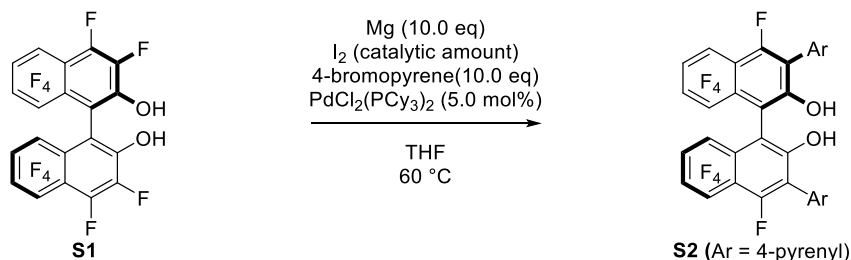

In a flame dried, nitrogen-flushed two-necked round-bottom flask, equipped with a reflux condenser, magnesium (121.5 mg, 5.0 mmol) and a catalytic amount of  $\text{I}_2$  were suspended in THF (2.0 mL). A small amount of 4-bromopyrene (1.4 g, 5.0 mmol) in THF (5.0 mL) was added to the mixture. The reaction was started by short heating to reflux. In order to keep the solution at reflux, further 4-bromopyrene solution was added dropwise. After complete addition of the 4-bromopyrene, the mixture was stirred for 30 minutes at 40 °C. To a mixture of  $\text{PdCl}_2(\text{PCy}_3)_2$  (18.5 mg, 0.025 mmol) and **S1** (251.1 mg, 0.5 mmol) in THF (1.5 mL) was added the 4-pyrenylmagnesium bromide solution at -78 °C under argon atmosphere. After evacuated and refilled with argon twice, the reaction mixture was stirred at 60 °C for 36 h. After the resulting mixture was cooled to room temperature, 3.0 M HCl aq. was added. The resulting mixture was extracted with  $\text{Et}_2\text{O}$ . The combined organic layer was dried over  $\text{Na}_2\text{SO}_4$ , and concentrated under reduced pressure after filtration. The residual crude was purified by silica gel column chromatography (hexane to hexane/ $\text{EtOAc}$  = 4/1) to afford **S2** (190.7 mg, 0.22 mmol, 44%) as a white solid.

### (*R*)-3,3'-(4-pyrenyl)<sub>2</sub>-F<sub>10</sub>BINOL (**S2**)

**S2**: White solid; (190.7 mg, 0.22 mmol, 44% yield);  $R_f$  = 0.45 (hexane/ $\text{EtOAc}$  = 4/1);  $[\alpha]^{21.3}_D = 27.4$  ( $c$  = 0.7,  $\text{CHCl}_3$ );  $^1\text{H}$  NMR (600 MHz,  $\text{CDCl}_3$ )  $\delta$ : 8.40–8.00 (m, 14H), 7.90–7.60 (m, 4H), Due to the presence of the several rotamers, the integrations are non-integer and have been rounded to best account for the overall number of protons.;  $^{13}\text{C}$  NMR (151 MHz,  $\text{CDCl}_3$ )  $\delta$ : 155.1 (dm,  $J$  = 267.4 Hz), 151.5, 142.8 (dm,  $J$  = 250.1 Hz), 142.2 (dm,  $J$  = 260.2 Hz), 140.2 (dm,  $J$  = 250.1 Hz), 136.9 (dt,  $J$  = 253.1 Hz, 15.9 Hz), 131.5, 131.3, 131.2, 131.1, 130.1, 130.0, 129.2, 129.1, 127.7, 127.6, 127.5, 127.3, 126.7, 126.4, 126.3, 126.1, 125.8, 125.6, 125.14, 125.08, 124.89, 124.86, 124.6, 122.5, 120.8, 116.6, 116.5, 107.6, 106.8,  $^{13}\text{C}$  signals could not be assigned due to the presence of the several rotamers and multiple  $^{13}\text{C}$ - $^{19}\text{F}$  couplings;  $^{19}\text{F}$  NMR (565 MHz,  $\text{CDCl}_3$ ): -112.2 to -112.8 (2F, m), -144.0 to -144.4 (2F, m), -146.2 to -147.1 (2F, m), -154.8 to -155.1 (2F, m), -160.5 to -160.8 (2F, m), Due to the presence of the several rotamers, the integrations are non-integer and have been rounded to

best account for the overall number of fluorines.; IR (ATR): 3727, 3705, 3693, 3680, 3648, 3623, 3599 3566, 2939, 1541, 1522, 1508, 1488, 1397, 1339, 1218, 1054, 1032, 1007, 772  $\text{cm}^{-1}$ ; HRMS(ESI) Calcd for  $\text{C}_{52}\text{H}_{19}\text{F}_{10}\text{O}_2$   $[\text{M}-\text{H}]^-$  865.1225, Found 865.1230.

## 2.2 Preparation of catalyst

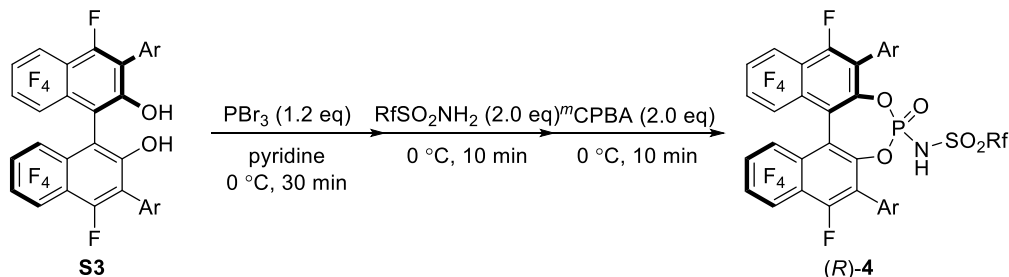

To a solution of **S3** (0.1 mmol, 1.0 eq) in pyridine (2.0 mL) was added  $\text{PBr}_3$  (0.12 mmol, 1.2 eq). The resulting mixture was stirred at 0 °C for 30 min. After stirring,  $\text{RfSO}_2\text{NH}_2$  (0.2 mmol, 2.0 eq) was added at -78 °C. The reaction mixture was warmed to 0 °C, and stirred for 10 min. To the reaction mixture,  $m\text{CPBA}$  (0.2 mmol, 2.0 eq) was added. The resulting mixture was stirred at 0 °C for 10 min. The reaction mixture was quenched by 1M  $\text{HCl}$  aq. (1.0 mL). The resulting mixture was extracted with  $\text{EtOAc}$ , dried over  $\text{Na}_2\text{SO}_4$  and concentrated under reduced pressure after filtration. The residual crude product was purified by column chromatography on silica gel (hexane/ $\text{EtOAc}$  = 3:1 to hexane/ $\text{EtOAc}$  = 1:1). The resultant solid was dissolved in  $\text{Et}_2\text{O}$ , and the solution was washed with 6M  $\text{HCl}$  aq. (3 mLx3). Organic layer was dried over  $\text{Na}_2\text{SO}_4$  and concentrated under reduced pressure after filtration to give **(R)-4**.

### **(R)-3,3'-(4-pyrenyl)<sub>2</sub>-F<sub>10</sub>BINOL-derived N-Tf Phosphoramidate (4c)**

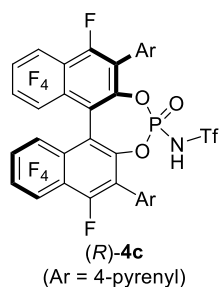

Brown solid; (38.2 mg, 0.04 mmol, 40% yield);  $R_f$  = 0.30 (hexane/ $\text{EtOAc}$  = 1/1);  $[\alpha]^{19.6}_{\text{D}} = 26.2$  ( $c$  = 0.6,  $\text{CHCl}_3$ );  $^1\text{H}$  NMR ( $\text{CD}_3\text{OD}$ , 600 MHz)  $\delta$ : 7.65–7.58 (m, 4H), 7.48–7.39 (m, 6H), Due to the presence of the several rotamers, the integrations are non-integer and have been rounded to best account for the overall number of protons.;  $^{13}\text{C}$  NMR (151 MHz,  $\text{CDCl}_3$ ):  $^{13}\text{C}$  signals could not be assigned due to the presence of the several rotamers and multiple  $^{13}\text{C}$ - $^{19}\text{F}$  couplings;  $^{31}\text{P}$  NMR (243 MHz,  $\text{CDCl}_3$ ): 5.64, 5.33, 4.07, 3.67;  $^{19}\text{F}$  NMR (565 MHz,  $\text{CDCl}_3$ ): -79.6 to -80.8 (3F), -103.3 to -110.5 (2F), -139.8 to -143.0 (4F), -151.9 to -153.2 (2F), -155.2 to -156.5 (2F) Due to the presence of the several rotamers, the integrations are non-integer and have been rounded to best account for the overall number of fluorines.; IR (ATR): 3723, 3705, 3680, 3648, 3632, 3623, 3599, 3565, 3526, 3503, 2972, 2938, 2865, 2843, 1670, 1624, 1564, 1541, 1339, 1218, 1054, 1032, 1014, 795  $\text{cm}^{-1}$ ; HRMS(ESI) Calcd for  $\text{C}_{53}\text{H}_{18}\text{F}_{13}\text{NO}_5\text{PS}$   $[\text{M}-\text{H}]^-$ : 1058.0436 Found: 1058.0440.

**(R)-3,3'-(4-pyrenyl)<sub>2</sub>-F<sub>10</sub>BINOL-derived N-C<sub>6</sub>F<sub>5</sub>SO<sub>2</sub> Phosphoramidate (4d)**

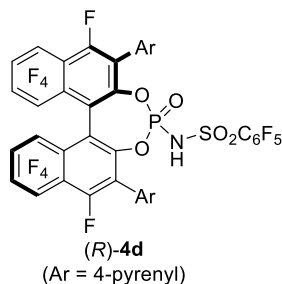

Brown solid; (33 mg, 0.03 mmol, 24% yield);  $R_f$  = 0.34 (hexane/EtOAc = 1/1);  $[\alpha]^{18.0}_D = 33.2$  ( $c = 1.0$ , CHCl<sub>3</sub>); <sup>1</sup>H NMR (acetone-*d*<sub>6</sub>, 600 MHz)  $\delta$ : 8.70–7.93 (m, 16H), 7.90–7.50 (m, 2H), Due to the presence of the several rotamers, the integrations are non-integer and have been rounded to best account for the overall number of protons.; <sup>13</sup>C NMR (151 MHz, CDCl<sub>3</sub>): <sup>13</sup>C signals could not be assigned due to the presence of the several rotamers and multiple <sup>13</sup>C-<sup>19</sup>F couplings; <sup>31</sup>P NMR (243 MHz, CDCl<sub>3</sub>): 5.48, 4.24, 3.49; <sup>19</sup>F NMR (565 MHz, CDCl<sub>3</sub>): -106.3 to -112.3 (2F), -136.1 to -146.9 (6F), -150.9 to -152.1 (1F), -153.1 to -160.9 (5F), Due to the presence of the several rotamers, the integrations are non-integer and have been rounded to best account for the overall number of fluorines.; IR (ATR): 3705, 3680, 3648, 3632, 3623, 3503, 2962, 2927, 1716, 1698, 1650, 1619, 1558, 1540, 1519, 1508, 1471, 1339, 1218, 1062, 1025 cm<sup>-1</sup>; HRMS(ESI) Calcd for C<sub>58</sub>H<sub>18</sub>F<sub>15</sub>NO<sub>5</sub>PS [M-H]<sup>-</sup>: 1156.0404, Found: 1156.0408.

**(R)-3,3'-(4-pyrenyl)<sub>2</sub>-F<sub>10</sub>BINOL-derived N-C<sub>4</sub>F<sub>9</sub>SO<sub>2</sub> Phosphoramidate (4e)**

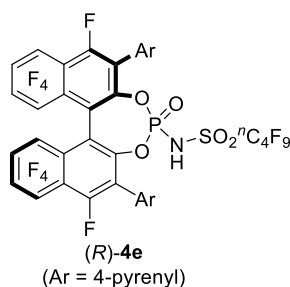

Brown solid; (36.3 mg, 0.03 mmol, 32% yield);  $R_f$  = 0.32 (hexane/EtOAc = 1/1);  $[\alpha]^{25.0}_D = 28.7$  ( $c = 0.6$ , CHCl<sub>3</sub>); <sup>1</sup>H NMR (CD<sub>3</sub>OD, 600 MHz)  $\delta$ : 8.67–7.82 (m, 15H), 7.76–7.29 (m, 3H), Due to the presence of the several rotamers, the integrations are non-integer and have been rounded to best account for the overall number of protons.; <sup>13</sup>C NMR (151 MHz, CDCl<sub>3</sub>): <sup>13</sup>C signals could not be assigned due to the presence of the several rotamers and multiple <sup>13</sup>C-<sup>19</sup>F couplings; <sup>31</sup>P NMR (243 MHz, CDCl<sub>3</sub>): 5.43, 3.79, 3.49; <sup>19</sup>F NMR (565 MHz, CDCl<sub>3</sub>): -80.9 to -81.0 (3F), -106.4 to -109.6 (2F), -113.2 to -114.7 (2F), -121.0 to -122.6 (2F), -126.2 to -126.5 (2F), -139.7 to -140.8 (2F), -142.1 to -142.7 (2F), -152.1 to -152.9 (2F), -155.4 to -156.2 (2F) Due to the presence of the several rotamers, the integrations are non-integer and have been rounded to best account for the overall number of fluorines.; IR (ATR): 3731, 3722, 3705, 3692, 3680, 3649, 3622, 3598, 2973, 2921, 2864, 1564, 1540, 1508, 1489, 1374, 1053, 1032, 1011, 795 cm<sup>-1</sup>; HRMS(ESI) Calcd for C<sub>56</sub>H<sub>18</sub>F<sub>19</sub>NO<sub>5</sub>PS [M-H]<sup>-</sup>: 1208.0340, Found: 1208.0342.

**(R)-3,3'-(9-phenanthryl)<sub>2</sub>-F<sub>10</sub>BINOL-derived N-C<sub>6</sub>F<sub>5</sub>SO<sub>2</sub> Phosphoramidate (4f)**

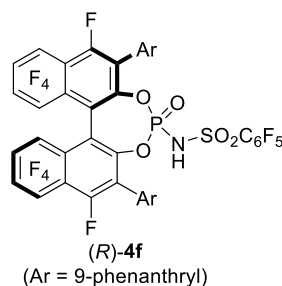

Brown solid; (36.6 mg, 0.03 mmol, 37% yield);  $R_f$  = 0.34 (hexane/EtOAc = 1/1);  $[\alpha]^{25.0}_D = -6.36$  ( $c = 0.73$ , CHCl<sub>3</sub>); <sup>1</sup>H NMR (600 MHz, CD<sub>3</sub>OD)  $\delta$ : 8.90–8.69 (m, 4H), 8.38–7.31 (m, 18H), Due to the presence of the several rotamers, the integrations are non-integer and have been rounded to best account for the overall number of protons.; <sup>13</sup>C NMR (151 MHz, CDCl<sub>3</sub>): <sup>13</sup>C signals could not be assigned due to the presence of the several

rotamers and multiple  $^{13}\text{C}$ - $^{19}\text{F}$  couplings;  $^{31}\text{P}$  NMR (243 MHz,  $\text{CDCl}_3$ ): 3.94, 3.00, 2.75, 2.29;  $^{19}\text{F}$  NMR (565 MHz,  $\text{CDCl}_3$ ): -104.9 to -110.7 (2F), -138.0 to -142.9 (6F), -148.0 to -151.0 (1F), -151.9 to -153.4 (2F), -155.3 to -156.9 (2F), -159.6 to -161.4 (2F), Due to the presence of the several rotamers, the integrations are non-integer and have been rounded to best account for the overall number of fluorines.; IR (ATR): 3731, 3704, 3693, 3680, 3648, 3623, 3599, 2972, 2940, 2863, 2843, 1647, 1564, 1540, 1523, 1508, 1032, 1008, 795  $\text{cm}^{-1}$ ; HRMS(ESI) Calcd for  $\text{C}_{54}\text{H}_{18}\text{F}_{15}\text{NO}_5\text{PS}$   $[\text{M}-\text{H}]^-$ : 1108.0404, Found: 1108.0407.

### 3. Enantioselective Addition Reaction of Simple Olefins with Ethyl Glyoxylate

Representative procedure for the enantioselective addition reaction of 1,1,2-trisubstituted olefins with ethyl glyoxylate

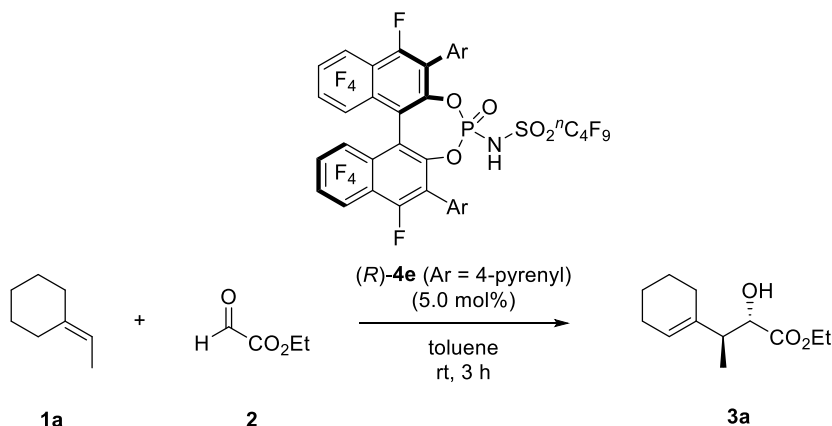

To a solution of *(R)*-**4e** (6.0 mg, 0.005 mmol) in toluene (0.5 mL) was added a **1a** (33.1 mg, 0.3 mmol) and freshly distilled ethyl glyoxylate **2** (10.2 mg, 0.1 mmol) at room temperature, and the resulting solution was stirred for indicated time at this temperature. The mixture was directly passed through flash column chromatography (Hexane/AcOEt = 6/1) to give **3a** (12.1 mg, 0.06 mmol, 57% yield) as a colorless oil. The enantiomeric excess was determined by chiral stationary phase HPLC analysis.

#### ethyl (2*S*,3*S*)-3-(cyclohex-1-en-1-yl)-2-hydroxybutanoate (**3a**)

**3a** 57% yield; colorless liquid;  $R_f$  = 0.49 (Hexane/EtOAc = 4/1); Diastereomers could be separated by flash column chromatography (Hexane/AcOEt = 9/1).;  $[\alpha]^{22.4}_D = -3.5$  ( $c = 1.0$ ,  $\text{CHCl}_3$ );  $^1\text{H}$  NMR ( $\text{CDCl}_3$ , 600 MHz)  $\delta$ : 5.55-5.52 (m, 1H), 4.24 (q,  $J = 7.2$  Hz, 2H), 4.20 (dd,  $J = 6.0$  Hz, 4.2 Hz, 1H), 2.56 (d,  $J = 6.0$  Hz, 1H), 2.45-2.40 (m, 1H), 2.09-1.92 (m, 4H), 1.69-1.52 (m, 4H), 1.30 (t,  $J = 7.2$  Hz, 3H), 1.01 (d,  $J = 7.2$  Hz, 3H);  $^{13}\text{C}$  NMR ( $\text{CDCl}_3$ , 150 MHz)  $\delta$ : 174.8, 138.02, 123.0, 73.0, 61.5, 45.0, 26.8, 25.3, 23.0, 22.4, 14.2, 12.7; IR (ATR): 3525, 2977, 2929, 2836, 1729, 1541, 1508, 1456, 1374, 1258, 1198, 1099, 1028  $\text{cm}^{-1}$ ; HRMS (ESI) Calcd for  $\text{C}_{12}\text{H}_{20}\text{NaO}_3$   $[\text{M}+\text{Na}]^+$  235.1310, Found: 235.1305.; HPLC analysis CHIRALPAK AS-H (hexane/ $i$ PrOH = 99/1, 1.0 mL/min, 220 nm, 30 °C) 8.8 min (major), 14.1 min (minor). Configuration Assignment: The relative and absolute configurations were assigned as (2*S*,3*S*) by comparison with the reported literature.<sup>1</sup>

<sup>1</sup> B.-C. Hong, S.-H. Chen, E. S. Kumar, G.-H. Lee and K.-J. Lin, *J. Chin. Chem. Soc.*, 2003, **50**, 917–926.

**ethyl (2*S*,3*S*)-3-(cyclohex-1-en-1-yl)-2-hydroxypentanoate (3b)**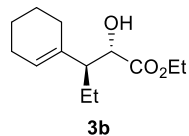

67% yield; colorless liquid:  $R_f$  = 0.47 (Hexane/EtOAc = 4/1); Diastereomers could be separated by flash column chromatography (Hexane/AcOEt = 9/1).;  $[\alpha]^{23.8}_D = 1.8$  ( $c = 1.0$ ,  $\text{CHCl}_3$ );  $^1\text{H}$  NMR ( $\text{CDCl}_3$ , 600 MHz)  $\delta$ : 5.51-5.48 (m, 1H), 4.25-4.16 (m, 2H), 4.07 (dd,  $J = 7.8$  Hz, 6.0 Hz, 1H), 2.52 (d,  $J = 7.8$  Hz, 1H), 2.14-2.09 (m, 1H), 2.06-1.95 (m, 2H), 1.95-1.91 (m, 2H), 1.63-1.45 (m, 6H), 1.29 (t,  $J = 7.2$  Hz, 3H), 0.82 (t,  $J = 7.2$  Hz, 3H);  $^{13}\text{C}$  NMR ( $\text{CDCl}_3$ , 150 MHz)  $\delta$ : 174.9, 136.0, 125.1, 73.8, 61.3, 54.4, 25.8, 25.4, 22.9, 22.5, 20.5, 14.2, 11.9; IR (ATR): 2961, 2927, 2874, 2837, 1728, 1455, 1260, 1191, 1106, 1064, 1027  $\text{cm}^{-1}$ ; HRMS (ESI) Calcd for  $\text{C}_{13}\text{H}_{22}\text{NaO}_3$   $[\text{M}+\text{Na}]^+$  249.1467, Found: 249.1461.; HPLC analysis CHIRALPAK AS-H (hexane/ $i$ -PrOH = 99/1, 1.0 mL/min, 220 nm, 30 °C) 8.6 min (major), 11.6 min (minor). Configuration Assignment: The relative and absolute configuration was assigned as (2*S*,3*S*) by analogy with compound **3a**.

**ethyl (2*S*,3*S*)-3-(cyclohept-1-en-1-yl)-2-hydroxybutanoate (3c)**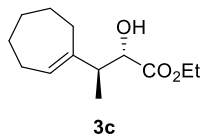

98% yield; colorless liquid:  $R_f$  = 0.47 (Hexane/EtOAc = 4/1); Diastereomers could be separated by flash column chromatography (Hexane/AcOEt = 9/1).;  $[\alpha]^{22.6}_D = 5.0$  ( $c = 1.0$ ,  $\text{CHCl}_3$ );  $^1\text{H}$  NMR ( $\text{CDCl}_3$ , 600 MHz)  $\delta$ : 5.67 (t,  $J = 6.0$  Hz, 1H), 4.23 (q,  $J = 7.2$  Hz, 2H), 4.15 (dd,  $J = 6.6$  Hz, 4.8 Hz, 1H), 2.52-2.47 (m, 2H), 2.19-2.15 (m, 2H), 2.14-2.07 (m, 2H), 1.82-1.75 (m, 1H), 1.74-1.67 (m, 1H), 1.59-1.46 (m, 2H), 1.45-1.38 (m, 2H), 1.30 (t,  $J = 7.2$  Hz, 3H), 1.00 (d,  $J = 6.6$  Hz, 3H);  $^{13}\text{C}$  NMR ( $\text{CDCl}_3$ , 150 MHz)  $\delta$ : 174.7, 144.8, 128.1, 72.7, 61.4, 46.6, 32.7, 31.2, 28.3, 27.0, 26.9, 14.2, 12.8; IR (ATR): 2972, 2920, 2849, 1728, 1445, 1256, 1198, 1096, 1024, 784, 759  $\text{cm}^{-1}$ ; HRMS (ESI) Calcd for  $\text{C}_{13}\text{H}_{22}\text{NaO}_3$   $[\text{M}+\text{Na}]^+$  249.1467, Found: 249.1461.; HPLC analysis CHIRALPAK AS-H (hexane/ $i$ -PrOH = 99/1, 1.0 mL/min, 220 nm, 30 °C) 7.8 min (major), 11.1 min (minor). Configuration Assignment: The relative and absolute configuration was assigned as (2*S*,3*S*) by analogy with compound **3a**.

**ethyl (*S*)-2-hydroxy-2-((*R*)-2-methylcyclohex-2-en-1-yl)acetate (3d)**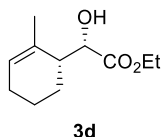

69% yield; colorless liquid:  $R_f$  = 0.42 (Hexane/EtOAc = 4/1); Diastereomers could not be separated.;  $[\alpha]^{23.2}_D = -9.2$  ( $c = 0.6$ ,  $\text{CHCl}_3$ ); Major Diastereomer (*syn*):  $^1\text{H}$  NMR ( $\text{CDCl}_3$ , 600 MHz)  $\delta$ : 5.68-5.65 (m, 1H), 4.53 (dd,  $J = 4.8$  Hz, 3.0 Hz, 1H), 4.28 (q,  $J = 7.2$  Hz, 2H), 2.72 (d,  $J = 4.8$  Hz, 1H), 2.54-2.49 (m, 1H), 2.04-1.93 (m, 2H), 1.79 (s, 3H), 1.83-1.74 (m, 1H), 1.60-1.41 (m, 3H), 1.32 (t,  $J = 7.2$  Hz, 3H);  $^{13}\text{C}$  NMR ( $\text{CDCl}_3$ , 150 MHz)  $\delta$ : 175.0, 132.2, 126.6, 70.6, 61.8, 42.4, 25.2, 22.7, 21.5, 21.3, 14.3; Minor diastereomer (*anti*):  $^1\text{H}$  NMR ( $\text{CDCl}_3$ , 600 MHz)  $\delta$ : 5.58-5.55 (m, 1H), 4.32-4.18 (m, 3H), 2.84 (d,  $J = 5.4$  Hz, 1H), 2.64-2.59 (m, 1H), 2.04-1.93 (m, 2H), 1.69 (s, 3H), 1.69-1.63 (m, 1H), 1.60-1.41 (m, 3H), 1.29 (t,  $J = 7.2$  Hz, 3H);  $^{13}\text{C}$  NMR ( $\text{CDCl}_3$ , 150 MHz)  $\delta$ : 175.0, 132.1, 126.1, 72.5, 61.6, 43.3, 26.3, 25.3, 22.3, 20.6, 14.1; IR (ATR):

2969, 2929, 2861, 1727, 1249, 1215, 1110, 1093, 1065, 1024  $\text{cm}^{-1}$ ; HRMS (ESI) Calcd for  $\text{C}_{11}\text{H}_{18}\text{NaO}_3$   $[\text{M}+\text{Na}]^+$  221.1154, Found: 221.1148.; HPLC analysis CHIRALPAK AS-H (hexane/ $i$ PrOH= 99/1, 1.0mL/min, 220 nm, 30  $^{\circ}\text{C}$ ) 9.4 min (major), 15.3 min (minor). Configuration Assignment: The relative configuration was determined by comparison with the reported literature.<sup>2</sup> The absolute configuration was assigned as (1*R*,2*S*) by analogy with compound **3a**.

**ethyl (S)-2-hydroxy-2-(1-methyl-3,4-dihydronaphthalen-2-yl)acetate (3'e)**

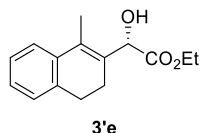

51% yield; colorless liquid:  $R_f$  = 0.20 (Hexane/EtOAc = 4/1);  $[\alpha]^{22.8}_{\text{D}} = 89.8$  ( $c$  = 1.0,  $\text{CHCl}_3$ );  $^1\text{H}$  NMR ( $\text{CDCl}_3$ , 600 MHz)  $\delta$ : 7.34 (d,  $J$  = 7.8 Hz, 1H), 7.23 (dt,  $J$  = 7.2 Hz, 1.2 Hz, 1H), 7.17 (dt,  $J$  = 7.2 Hz, 1.2 Hz, 1H), 7.13 (dd,  $J$  = 7.2 Hz, 0.6 Hz, 1H), 5.29 (d,  $J$  = 4.8 Hz, 1H), 4.23 (dq,  $J$  = 7.2 Hz, 1.2 Hz, 2H), 3.26 (d,  $J$  = 4.8 Hz, 1H), 2.79-2.67 (m, 2H), 2.39-2.32 (m, 1H), 2.19 (t,  $J$  = 1.2 Hz, 3H), 2.04-1.97 (m, 1H);  $^{13}\text{C}$  NMR ( $\text{CDCl}_3$ , 150 MHz)  $\delta$ : 174.3, 136.3, 136.2, 131.5, 130.8, 127.1, 127.0, 126.4, 123.7, 70.0, 62.1, 28.4, 22.2, 14.3, 14.1; IR (ATR): 3502, 2986, 2930, 2901, 2835, 1727, 1487, 1450, 1394, 1382, 1253, 1208, 1080, 1065, 1051, 1018, 759  $\text{cm}^{-1}$ ; HRMS (ESI) Calcd for  $\text{C}_{15}\text{H}_{18}\text{NaO}_3$   $[\text{M}+\text{Na}]^+$  269.1154, Found: 269.1148.; HPLC analysis CHIRALPAK AS-H (hexane/ $i$ PrOH= 99/1, 1.0mL/min, 254 nm, 30  $^{\circ}\text{C}$ ) 21.5 min (major), 26.7 min (minor). Configuration Assignment: The absolute configuration was assigned as (*S*) by analogy with compound **3'j**.

**ethyl (S)-2-hydroxy-2-(3-phenyl-1H-inden-2-yl)acetate (3'f)**

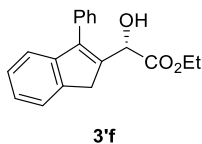

91% yield; yellow liquid:  $R_f$  = 0.26 (Hexane/EtOAc = 4/1);  $[\alpha]^{23.9}_{\text{D}} = 115.7$  ( $c$  = 1.0,  $\text{CHCl}_3$ );  $^1\text{H}$  NMR ( $\text{CDCl}_3$ , 600 MHz)  $\delta$ : 7.54-7.46 (m, 5H), 7.41 (tt,  $J$  = 9.0 Hz, 1.8 Hz, 1H), 7.31-7.23 (m, 3H), 5.18 (d,  $J$  = 4.8 Hz, 1H), 4.30-4.18 (m, 2H), 3.73 (d,  $J$  = 22.8 Hz, 1H), 3.29 (dd,  $J$  = 13.8 Hz, 9.0 Hz, 2H), 1.27 (t,  $J$  = 7.2 Hz, 3H);  $^{13}\text{C}$  NMR ( $\text{CDCl}_3$ , 150 MHz)  $\delta$ : 174.0, 145.1, 144.1, 142.5, 138.6, 133.9, 129.2, 128.5, 127.9, 126.4, 125.6, 124.0, 120.8, 67.7, 62.4, 36.6, 14.1; IR (ATR): 3058, 3019, 2982, 2900, 1730, 1272, 1208, 1070  $\text{cm}^{-1}$ ; HRMS (ESI) Calcd for  $\text{C}_{19}\text{H}_{18}\text{NaO}_3$   $[\text{M}+\text{Na}]^+$  317.1154, Found: 317.1148.; HPLC analysis CHIRALPAK AS-H (hexane/ $i$ PrOH= 98/2, 1.0mL/min, 254 nm, 30  $^{\circ}\text{C}$ ) 27.9 min (major), 38.2 min (minor). Configuration Assignment: The absolute configuration was assigned as (*S*) by analogy with compound **3'j**.

<sup>2</sup> D. A. Evans, S. W. Tregay, C. S. Burgey, N. A. Paras and T. Vojkovsky, *J. Am. Chem. Soc.* 2000, **122**, 7936–7943.

Representative procedure for the enantioselective addition reaction of 1,1-disubstituted olefins with ethyl glyoxylate

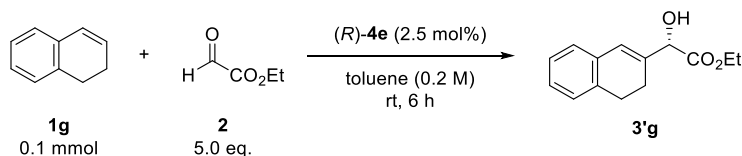

To a solution of (*R*)-**4e** (3.0 mg, 0.0025 mmol) in toluene (0.5 mL) was added freshly distilled ethyl glyoxylate **2** (51.0 mg, 0.5 mmol) and **1g** (13.0 mg, 0.1 mmol) at room temperature, and the resulting solution was stirred for indicated time at this temperature. The mixture was directly passed through flash column chromatography (Hexane/AcOEt = 3/1) to give **6a** (17.0 mg, 0.073 mmol, 73% yield) as a colorless oil. The enantiomeric excess was determined by chiral stationary phase HPLC analysis.

#### ethyl (*S*)-2-(3,4-dihydronaphthalen-2-yl)-2-hydroxyacetate (**3'g**)

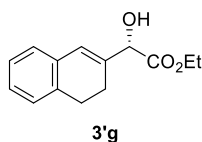

73% yield; colorless liquid:  $R_f$  = 0.26 (Hexane/EtOAc = 4/1);  $[\alpha]^{21.6}_D$  = 16.8 ( $c$  = 1.0, CHCl<sub>3</sub>); <sup>1</sup>H NMR (CDCl<sub>3</sub>, 600 MHz)  $\delta$ : 7.18-7.12 (m, 2H), 7.11 (d,  $J$  = 6.6 Hz, 1H), 7.07 (dd,  $J$  = 7.2 Hz, 2.4 Hz, 1H), 6.59 (s, 1H), 4.73 (d,  $J$  = 4.8 Hz, 1H), 4.31-4.23 (m, 2H), 3.23 (d,  $J$  = 5.4 Hz, 1H), 2.84 (t,  $J$  = 8.4 Hz, 2H), 2.47-2.40 (m, 1H), 2.22-2.15 (m, 1H), 1.28 (t,  $J$  = 7.2 Hz, 3H); <sup>13</sup>C NMR (CDCl<sub>3</sub>, 150 MHz)  $\delta$ : 173.4, 136.9, 135.2, 133.6, 127.4, 127.3, 126.5, 126.4, 74.1, 62.2, 27.9, 23.0, 14.2; IR (ATR): 2930, 1747, 1480, 1317, 1263, 1104 cm<sup>-1</sup>; HRMS (ESI) Calcd for C<sub>14</sub>H<sub>16</sub>NaO<sub>3</sub> [M+Na]<sup>+</sup>, Found 255.0992.; HPLC analysis CHIRALPAK AS-H (hexane/<sup>i</sup>PrOH = 99/1, 1.0 mL/min, 254 nm, 30 °C) 27.4 min (major), 38.2 min (minor). Configuration Assignment: The absolute configuration was assigned as (*S*) by analogy with compound **3'j**.

#### ethyl (*S*)-2-(6-bromo-3,4-dihydronaphthalen-2-yl)-2-hydroxyacetate (**3'h**)

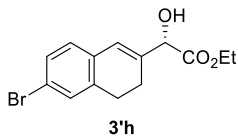

44% yield; colorless liquid:  $R_f$  = 0.24 (Hexane/EtOAc = 4/1);  $[\alpha]^{23.6}_D$  = 242.4 ( $c$  = 1.0, CHCl<sub>3</sub>); <sup>1</sup>H NMR (CDCl<sub>3</sub>, 600 MHz)  $\delta$ : 7.30-7.24 (m, 2H), 6.93 (d,  $J$  = 7.8 Hz, 1H), 6.54 (s, 1H), 4.71 (d,  $J$  = 4.2 Hz, 1H), 4.31-4.23 (m, 2H), 3.26 (d,  $J$  = 4.8 Hz, 1H), 2.81 (t,  $J$  = 8.4 Hz, 2H), 2.46-2.38 (m, 1H), 2.21-2.13 (m, 1H), 1.28 (t,  $J$  = 7.2 Hz, 3H); <sup>13</sup>C NMR (CDCl<sub>3</sub>, 150 MHz)  $\delta$ : 173.2, 137.5, 137.2, 132.4, 130.3, 129.5, 127.9, 125.3, 120.8, 73.9, 62.3, 27.7, 22.8, 14.1; IR (ATR): 2932, 1733, 1480, 1263, 1113, 1074, 882, 802 cm<sup>-1</sup>; HRMS (ESI) Calcd for C<sub>14</sub>H<sub>15</sub>BrNaO<sub>3</sub> [M+Na]<sup>+</sup> 333.0102, Found: 335.0096.; HPLC analysis CHIRALPAK AS-H (hexane/<sup>i</sup>PrOH = 99/1, 1.0 mL/min, 254 nm, 30 °C) 18.9 min (major), 27.2 min (minor). Configuration Assignment: The absolute configuration was assigned as (*S*) by analogy with compound **3'j**.

**ethyl (S)-2-(6,7-dihydro-5H-benzo[7]annulen-8-yl)-2-hydroxyacetate (3'i)**

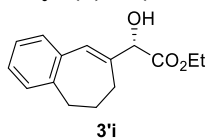

60% yield; colorless liquid:  $R_f = 0.29$  (Hexane/EtOAc = 4/1);  $[\alpha]^{22.6}_D = 53.5$  ( $c = 1.0$ ,  $\text{CHCl}_3$ );  $^1\text{H NMR}$  ( $\text{CDCl}_3$ , 600 MHz)  $\delta$ : 7.18 (dd,  $J = 1.2$  Hz, 4.8 Hz, 2H), 7.16-7.10 (m, 2H), 6.63 (s, 1H), 4.69 (d,  $J = 3.0$  Hz, 1H), 4.33-4.25 (m, 2H), 3.30 (d,  $J = 4.2$  Hz, 1H), 2.81-2.72 (m, 2H), 2.41 (dt,  $J = 6.0$  Hz, 13.2 Hz, 1H), 2.14 (dt,  $J = 7.2$  Hz, 16.8 Hz, 1H), 2.06-2.00 (m, 2H), 1.30 (t,  $J = 7.2$  Hz, 3H);  $^{13}\text{C NMR}$  ( $\text{CDCl}_3$ , 150 MHz)  $\delta$ : 174.0, 141.6, 139.4, 135.6, 130.8, 130.6, 129.0, 127.1, 126.0, 62.2, 34.8, 29.1, 28.6, 14.1; IR (ATR): 2981, 2929, 2857, 1730, 1258, 1198, 1105, 1075, 1023  $\text{cm}^{-1}$ ; HRMS (ESI) Calcd for  $\text{C}_{15}\text{H}_{18}\text{NaO}_3$   $[\text{M}+\text{Na}]^+$  269.1154, Found: 269.1148.; HPLC analysis CHIRALPAK AS-H (hexane/ $i$ PrOH = 96/4, 1.0 mL/min, 254 nm, 30 °C) 22.1 min (major), 26.7 min (minor). Configuration Assignment: The absolute configuration was assigned as (S) by analogy with compound 3'j.

**ethyl (S)-2-hydroxy-2-(1H-inden-2-yl)acetate (3'j)**

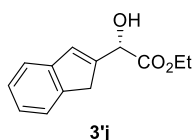

39% yield; colorless liquid:  $R_f = 0.22$  (Hexane/EtOAc = 4/1);  $[\alpha]^{24.3}_D = 47.2$  ( $c = 0.85$ ,  $\text{CHCl}_3$ );  $^1\text{H NMR}$  ( $\text{CDCl}_3$ , 600 MHz)  $\delta$ : 7.43 (d,  $J = 7.2$  Hz, 1H), 7.36 (d,  $J = 7.2$  Hz, 1H), 7.26 (t,  $J = 7.2$  Hz, 1H), 7.19 (dt,  $J = 7.8$  Hz, 1.2 Hz, 1H), 6.91 (s, 1H), 5.12 (d,  $J = 6.0$  Hz, 1H), 4.34-4.22 (m, 2H), 3.55 (d,  $J = 22.8$  Hz, 1H), 3.36 (d,  $J = 20.4$  Hz, 1H), 3.23 (d,  $J = 5.4$  Hz, 1H), 1.30 (t,  $J = 7.2$  Hz, 3H);  $^{13}\text{C NMR}$  ( $\text{CDCl}_3$ , 150 MHz)  $\delta$ : 173.0, 145.0, 143.9, 143.2, 129.9, 126.5, 125.0, 123.8, 121.2, 70.3, 62.3, 38.2, 14.2; IR (ATR): 2980, 2923, 1730, 1460, 1394, 1255, 1195, 1131, 1096, 1066, 1017, 751, 716  $\text{cm}^{-1}$ ; HRMS (ESI) Calcd for  $\text{C}_{13}\text{H}_{14}\text{NaO}_3$   $[\text{M}+\text{Na}]^+$  241.0841, Found: 241.0835.; HPLC analysis CHIRALPAK AS-H (hexane/ $i$ PrOH = 98/2, 1.0 mL/min, 254 nm, 30 °C) 34.2 min (major), 56.3 min (minor). Configuration Assignment: The absolute configuration was assigned as (S) by the Mosher's method after the derivatization.

**ethyl (S)-2-(6-bromo-1H-inden-2-yl)-2-hydroxyacetate (3'k)**

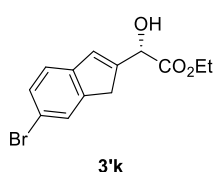

51% yield; white solid:  $R_f = 0.27$  (Hexane/EtOAc = 4/1);  $[\alpha]^{21.2}_D = 41.9$  ( $c = 1.0$ ,  $\text{CHCl}_3$ );  $^1\text{H NMR}$  ( $\text{CDCl}_3$ , 600 MHz)  $\delta$ : 7.56 (s, 1H), 7.39 (dd,  $J = 8.4$  Hz, 1.8 Hz, 1H), 7.21 (d,  $J = 8.4$  Hz, 1H), 6.86 (s, 1H), 5.09 (d,  $J = 4.8$  Hz, 1H), 4.34-4.24 (m, 2H), 3.54 (d,  $J = 22.8$  Hz, 1H), 3.35 (d,  $J = 22.8$  Hz, 1H), 3.26 (d,  $J = 6.0$  Hz, 1H), 1.31 (t,  $J = 7.2$  Hz, 3H);  $^{13}\text{C NMR}$  ( $\text{CDCl}_3$ , 150 MHz)  $\delta$ : 172.8, 145.5, 145.2, 142.8, 129.6, 129.1, 127.1, 122.4, 119.0, 70.1, 62.5, 38.3, 14.2; IR (ATR): 3524, 2972, 2928, 1729, 1260, 1210, 1066  $\text{cm}^{-1}$ ; HRMS (ESI) Calcd for  $\text{C}_{13}\text{H}_{13}\text{BrNaO}_3$   $[\text{M}+\text{Na}]^+$  318.9946, Found: 318.9941.; HPLC analysis CHIRALPAK AS-H (hexane/ $i$ PrOH = 99/1, 1.0 mL/min, 254 nm, 30 °C) 17.9 min (major), 26.7 min (minor). Configuration Assignment: The absolute configuration was assigned as (S) by analogy with compound 3'j.

Experimental procedure for the enantioselective addition reaction of **1f** with **2** on a large scale

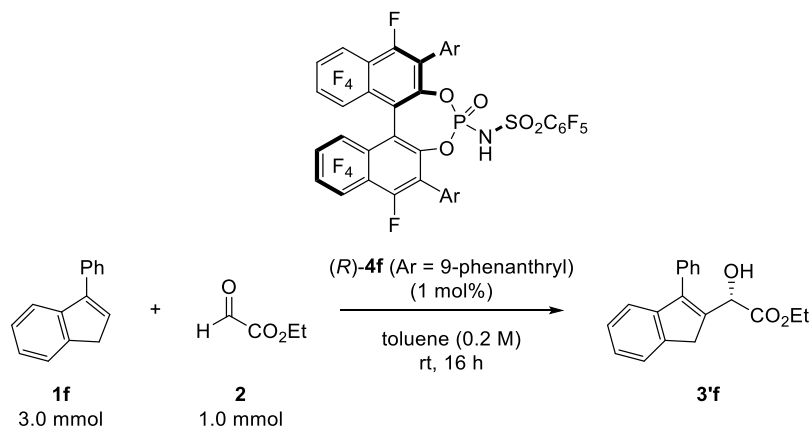

To a solution of (R)-**4f** (11.1 mg, 0.01 mmol) in toluene (5.0 mL) was added a **1f** (0.58 g, 3.0 mmol) and freshly distilled ethyl glyoxylate **2** (0.10 g, 1.0 mmol) at room temperature, and the resulting solution was stirred for indicated time at this temperature. The mixture was directly passed through flash column chromatography (Hexane/AcOEt = 6/1) to give **3f** (0.24 g, 0.82 mmol, 82% yield) as a colorless oil. The enantiomeric excess was determined by chiral stationary phase HPLC analysis.

## 4. Additional Screening

### 4-1. Screening of catalysts

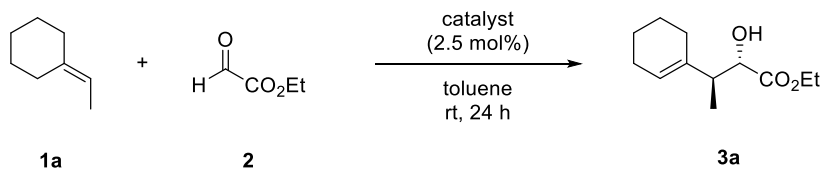

**Table S1.**

| entry | catalyst                                                                                         | yield <sup>a</sup> (%) | dr    | ee (%) | note             |
|-------|--------------------------------------------------------------------------------------------------|------------------------|-------|--------|------------------|
| 1     | ( <i>R</i> )- <b>7</b> (Ar = 9-phenanthryl)                                                      | 26                     | 89/11 | 55     | Table 1, entry 3 |
| 2     | ( <i>R</i> )- <b>7b</b> (Ar = 2,4,6- <i>i</i> Pr <sub>3</sub> C <sub>6</sub> H <sub>2</sub> )    | 27                     | 76/24 | 18     |                  |
| 3     | ( <i>R</i> )- <b>4a</b> (Ar = 9-phenanthryl, Rf = CF <sub>3</sub> )                              | 62                     | 87/13 | 58     | Table 1, entry 4 |
| 4     | ( <i>R</i> )- <b>4g</b> (Ar = 9-phenanthryl, Rf = <sup>n</sup> C <sub>4</sub> F <sub>9</sub> )   | 67                     | 88/12 | 70     |                  |
| 5     | ( <i>R</i> )- <b>4b</b> (Ar = 1-pyrenyl, Rf = CF <sub>3</sub> )                                  | 72                     | 89/11 | 55     | Table 1, entry 5 |
| 6     | ( <i>R</i> )- <b>4h</b> (Ar = 1-pyrenyl, Rf = <sup>n</sup> C <sub>4</sub> F <sub>9</sub> )       | 43                     | 90/10 | 68     |                  |
| 7     | ( <i>R</i> )- <b>4c</b> (Ar = 4-pyrenyl, Rf = CF <sub>3</sub> )                                  | 58                     | 90/10 | 69     | Table 1, entry 6 |
| 8     | ( <i>R</i> )- <b>4i</b> (Ar = 4-pyrenyl, Rf = C <sub>2</sub> F <sub>5</sub> )                    | 29                     | 88/12 | 59     |                  |
| 9     | ( <i>R</i> )- <b>4e</b> (Ar = 4-pyrenyl, Rf = <sup>n</sup> C <sub>4</sub> F <sub>9</sub> )       | 47                     | 90/10 | 80     | Table 1, entry 8 |
| 10    | ( <i>R</i> )- <b>4j</b> (Ar = Ph, Rf = CF <sub>3</sub> )                                         | 43                     | 89/11 | 54     |                  |
| 11    | ( <i>R</i> )- <b>4k</b> (Ar = 2-naphthyl, Rf = CF <sub>3</sub> )                                 | 48                     | 91/9  | 57     |                  |
| 12    | ( <i>R</i> )- <b>4l</b> (Ar = 6-methoxy-2-naphthyl, Rf = CF <sub>3</sub> )                       | 48                     | 87/13 | 42     |                  |
| 13    | ( <i>R</i> )- <b>8</b> (Ar = 2-naphthyl, X = S)                                                  | <1                     | --    | --     |                  |
| 14    | ( <i>R</i> )- <b>9</b> (Ar = 3,5-(CF <sub>3</sub> ) <sub>2</sub> C <sub>6</sub> H <sub>3</sub> ) | 48                     | 62/38 | 30     |                  |

<sup>a</sup>NMR yield.

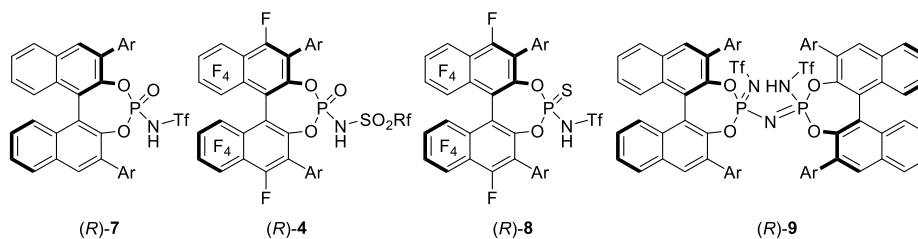

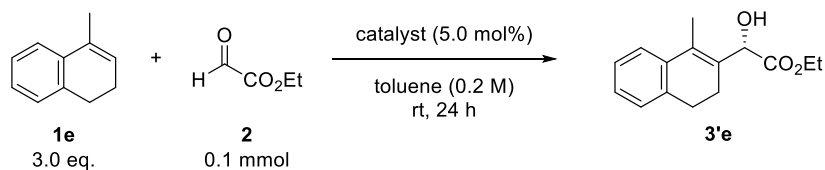

**Table S2.**

| entry | catalyst                                                                                           | yield <sup>a</sup> (%) | ee (%) | note             |
|-------|----------------------------------------------------------------------------------------------------|------------------------|--------|------------------|
| 1     | ( <i>R</i> )- <b>4a</b> (G = 9-phenanthryl, Rf = CF <sub>3</sub> )                                 | 26                     | 63     |                  |
| 2     | ( <i>R</i> )- <b>4f</b> (G = 9-phenanthryl, Rf = C <sub>6</sub> F <sub>5</sub> )                   | 49                     | 81     | Table 2, entry 5 |
| 3     | ( <i>R</i> )- <b>4g</b> (G = 9-phenanthryl, Rf = <sup>n</sup> C <sub>4</sub> F <sub>9</sub> )      | 29                     | 67     |                  |
| 4     | ( <i>R</i> )- <b>4h</b> (G = 9-phenanthryl, Rf = C <sub>10</sub> F <sub>7</sub> )                  | 35                     | 75     |                  |
| 5     | ( <i>R</i> )- <b>4m</b> (G = 9-phenanthryl, Rf = 4-CF <sub>3</sub> C <sub>6</sub> F <sub>4</sub> ) | 20                     | 62     |                  |
| 6     | ( <i>R</i> )- <b>4b</b> (G = 1-pyrenyl, Rf = CF <sub>3</sub> )                                     | 69                     | 47     |                  |
| 7     | ( <i>R</i> )- <b>4c</b> (G = 4-pyrenyl, Rf = CF <sub>3</sub> )                                     | 42                     | 60     |                  |
| 8     | ( <i>R</i> )- <b>4d</b> (G = 4-pyrenyl, Rf = C <sub>6</sub> F <sub>5</sub> )                       | 43                     | 71     |                  |
| 9     | ( <i>R</i> )- <b>4e</b> (G = 4-pyrenyl, Rf = <sup>n</sup> C <sub>4</sub> F <sub>9</sub> )          | 38                     | 67     | Table 2, entry 4 |

<sup>a</sup>Isolated yield

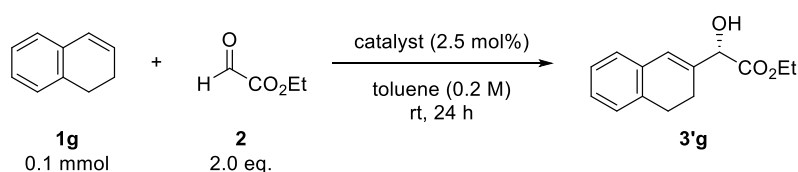

**Table S3.**

| entry          | catalyst                                                                                      | yield <sup>a</sup> (%) | ee (%) | note             |
|----------------|-----------------------------------------------------------------------------------------------|------------------------|--------|------------------|
| 1              | ( <i>R</i> )- <b>4a</b> (G = 9-phenanthryl, Rf = CF <sub>3</sub> )                            | 30                     | 66     |                  |
| 2              | ( <i>R</i> )- <b>4f</b> (G = 9-phenanthryl, Rf = C <sub>6</sub> F <sub>5</sub> )              | < 1                    | -      |                  |
| 3              | ( <i>R</i> )- <b>4g</b> (G = 9-phenanthryl, Rf = <sup>n</sup> C <sub>4</sub> F <sub>9</sub> ) | 41                     | 74     |                  |
| 4              | ( <i>R</i> )- <b>4b</b> (G = 1-pyrenyl, Rf = CF <sub>3</sub> )                                | 48                     | 52     |                  |
| 5              | ( <i>R</i> )- <b>4c</b> (G = 4-pyrenyl, Rf = CF <sub>3</sub> )                                | 57                     | 66     |                  |
| 6              | ( <i>R</i> )- <b>4e</b> (G = 4-pyrenyl, Rf = <sup>n</sup> C <sub>4</sub> F <sub>9</sub> )     | 67                     | 72     |                  |
| 7 <sup>b</sup> | ( <i>R</i> )- <b>4e</b> (G = 4-pyrenyl, Rf = <sup>n</sup> C <sub>4</sub> F <sub>9</sub> )     | 73                     | 72     | Table 3, entry 1 |

<sup>a</sup>Isolated yield, <sup>b</sup>**2**: 5.0 eq.

#### 4-2. Control experiment

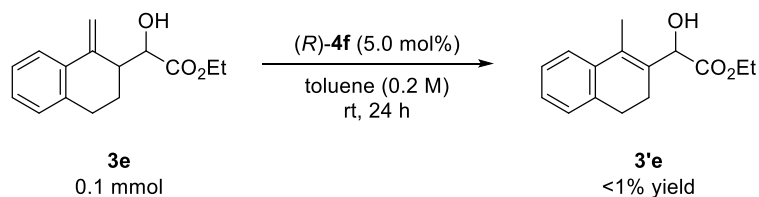

## 5. Determination of absolute configuration

The absolute configuration of **3'j** was determined by the Mosher's method after the derivatization of **3'j** to **S4**. **S4** were converted into the (*S*)- and (*R*)-MTPA esters by treatment with (*R*)- and (*S*)-MTPA chloride, respectively. The  $\Delta\delta$  values ( $\delta^S - \delta^R$  (ppm)) calculated for the two esters (Figure S1) indicated that **3'j** had an *S* configuration.

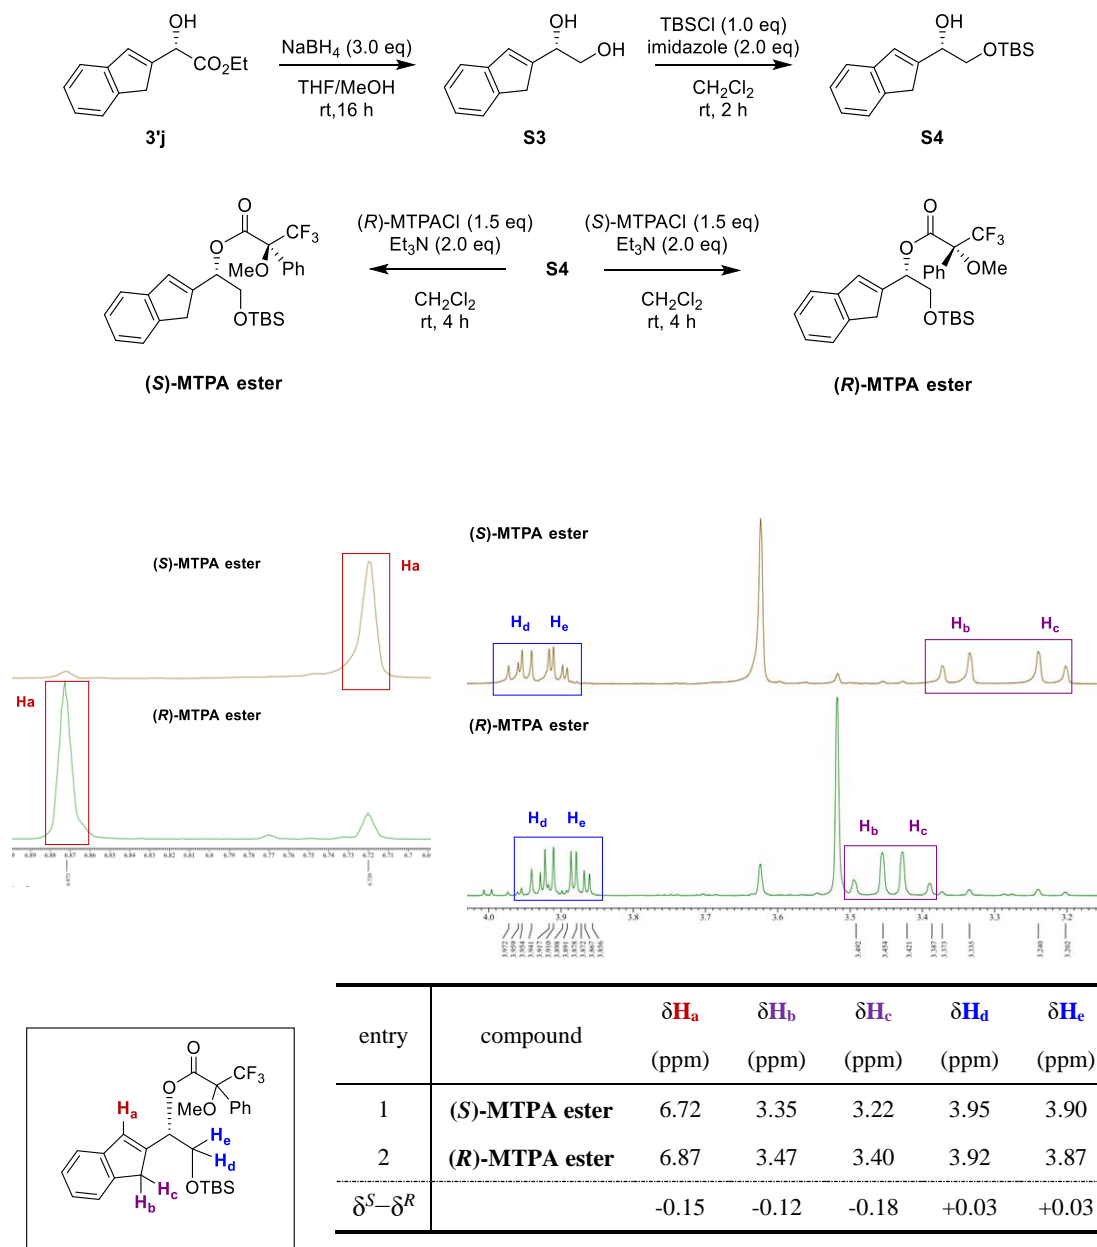

Figure S1. NMR spectra and Chemical shifts of MTPA esters

#### Experimental procedure of 3'j to S4

To a solution of **3'j** (21.8 mg, 0.1 mmol, 86% ee) in THF (0.5 mL) and MeOH (0.1 mL) was added NaBH<sub>4</sub> (11.3 mg, 0.3 mmol) in one portion at 0 °C. After stirring for 16 h at the ambient temperature, H<sub>2</sub>O was added. The aqueous layer was extracted with EtOAc. The combined organic layers were dried over Na<sub>2</sub>SO<sub>4</sub> and concentrated under reduced pressure after filtration to give **S3**. To a solution of **S3** in CH<sub>2</sub>Cl<sub>2</sub> (1.7 mL) was added TBSCl (15.1 mg, 0.1 mmol) and imidazole (13.6 mg, 0.2 mmol) at ambient temperature. After stirring for 2 h at the ambient temperature, the reaction mixture was quenched with H<sub>2</sub>O and the resulting mixture was extracted with CH<sub>2</sub>Cl<sub>2</sub>. The combined organic layers were dried over Na<sub>2</sub>SO<sub>4</sub> and evaporated in vacuo. The residue was purified by silica gel column chromatography (hexane/EtOAc = 8/1) to afford the corresponding alcohol **S4** (80% yield, 2steps).

#### Experimental procedure of S4 to MTPA ester

To a solution of **S4** (11.6 mg, 0.04 mmol), Et<sub>3</sub>N (4.0 mg, 0.04 mmol) and DMAP (0.5 mg, 0.004 mmol) in CH<sub>2</sub>Cl<sub>2</sub> (0.4 mL) was added (*R*)- or (*S*)-MTPACl (15.2 mg, 0.06 mmol) at room temperature, and the resulting solution was stirred for 4 h at this temperature. The mixture was directly passed through column chromatography (Hexane/EtOAc/Et<sub>3</sub>N = 10/1/0.1) to give the (*R*)- or (*S*)-**MTPA ester**.

#### (*S*)-2-((*tert*-butyldimethylsilyl)oxy)-1-(1*H*-inden-2-yl)ethan-1-ol (**S4**)

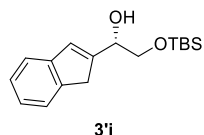

colorless oil:  $R_f$  = 0.62 (Hexane/EtOAc = 4/1);  $[\alpha]^{17.7}_D$  = 2.46 ( $c$  = 0.4, CHCl<sub>3</sub>); <sup>1</sup>H NMR (CDCl<sub>3</sub>, 600 MHz)  $\delta$ : 7.42 (d,  $J$  = 7.8 Hz, 1H), 7.34 (d,  $J$  = 7.2 Hz, 1H), 7.25 (t,  $J$  = 7.8 Hz, 1H), 7.16 (dt,  $J$  = 7.8 Hz, 0.6 Hz, 1H), 6.80 (s, 1H), 4.71-4.67 (m, 1H), 3.84 (dd,  $J$  = 10.2 Hz, 4.2 Hz, 1H), 3.65 (dd,  $J$  = 9.6 Hz, 7.8 Hz, 1H), 3.46 (d,  $J$  = 22.8 Hz, 1H), 3.39 (d,  $J$  = 22.8 Hz, 1H), 2.83 (d,  $J$  = 3.0 Hz, 1H), 0.93 (s, 9H), 0.11 (s, 3H), 0.10 (s, 3H); <sup>13</sup>C NMR (CDCl<sub>3</sub>, 150 MHz)  $\delta$ : 147.8, 144.5, 143.1, 127.9, 126.3, 124.4, 123.6, 120.8, 71.4, 67.3, 38.4, 25.9, 18.3, -5.36, -5.38; IR (ATR): 2956, 2928, 2857, 1099, 1056, 836, 802, 777 cm<sup>-1</sup>.

## 6. NMR Spectra

$^1\text{H}$  NMR (600 MHz) and  $^{13}\text{C}$  NMR (150 MHz) spectra of **S2**

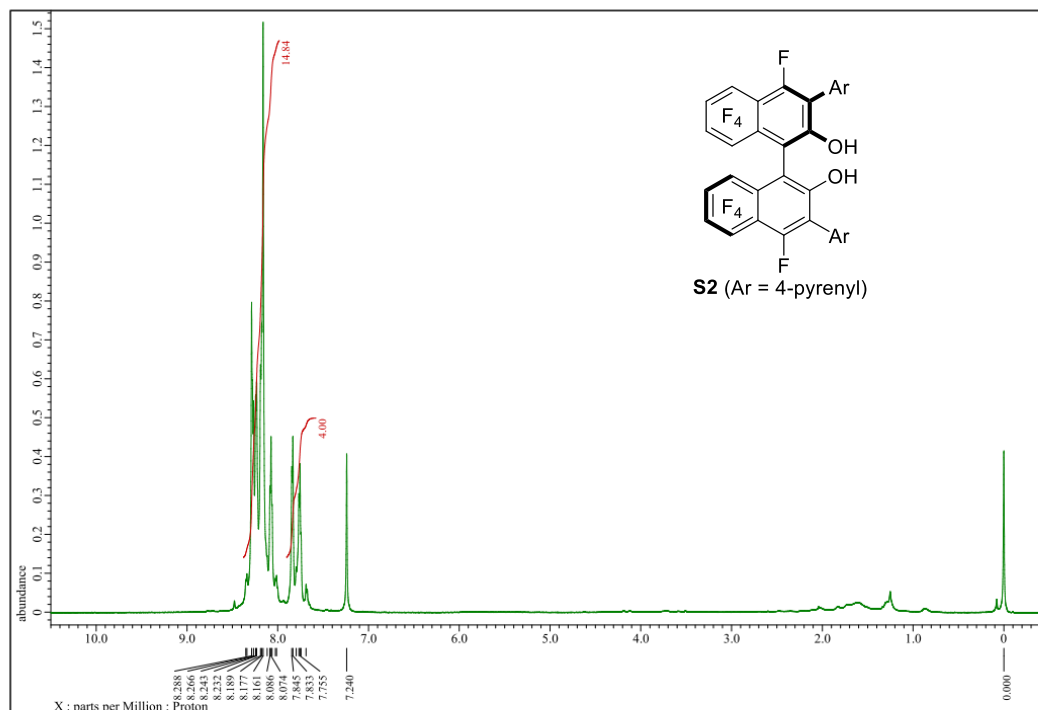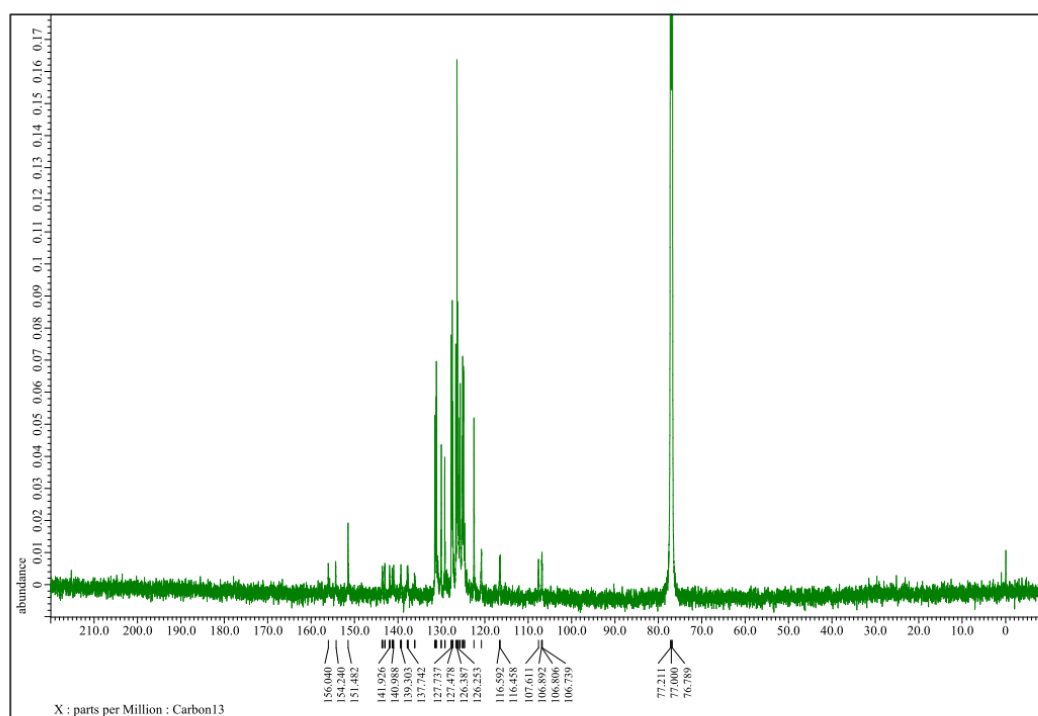

$^{19}\text{F}$  NMR (565 MHz) spectra of S2

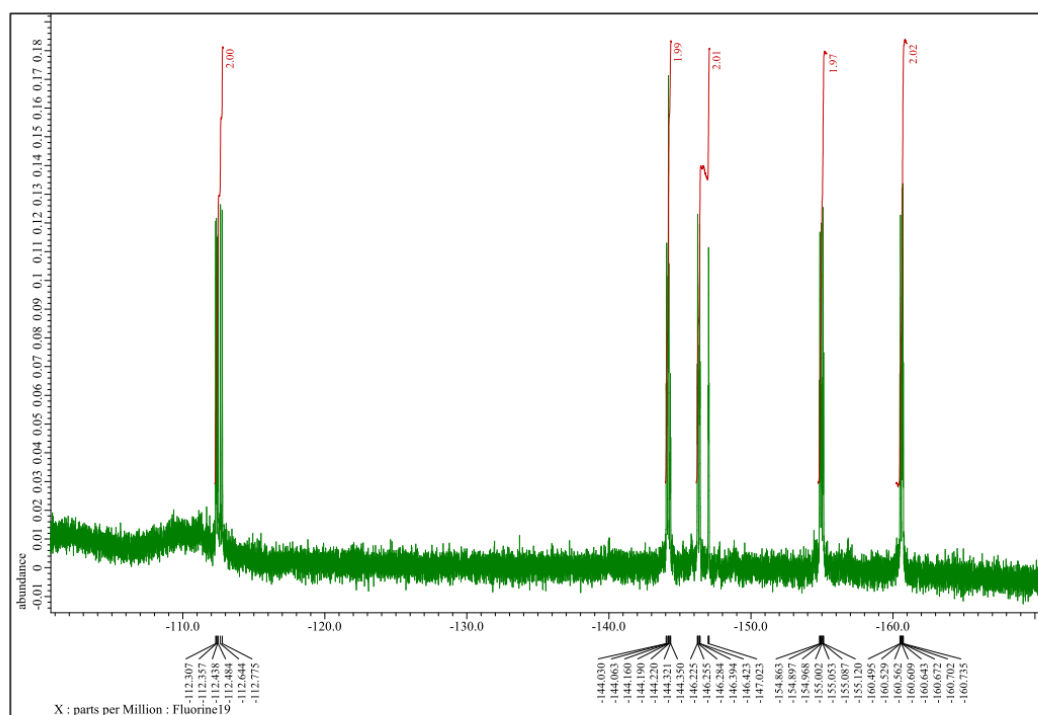

<sup>1</sup>H NMR (600 MHz) and <sup>13</sup>C NMR (150 MHz) spectra of (*R*)-**4c**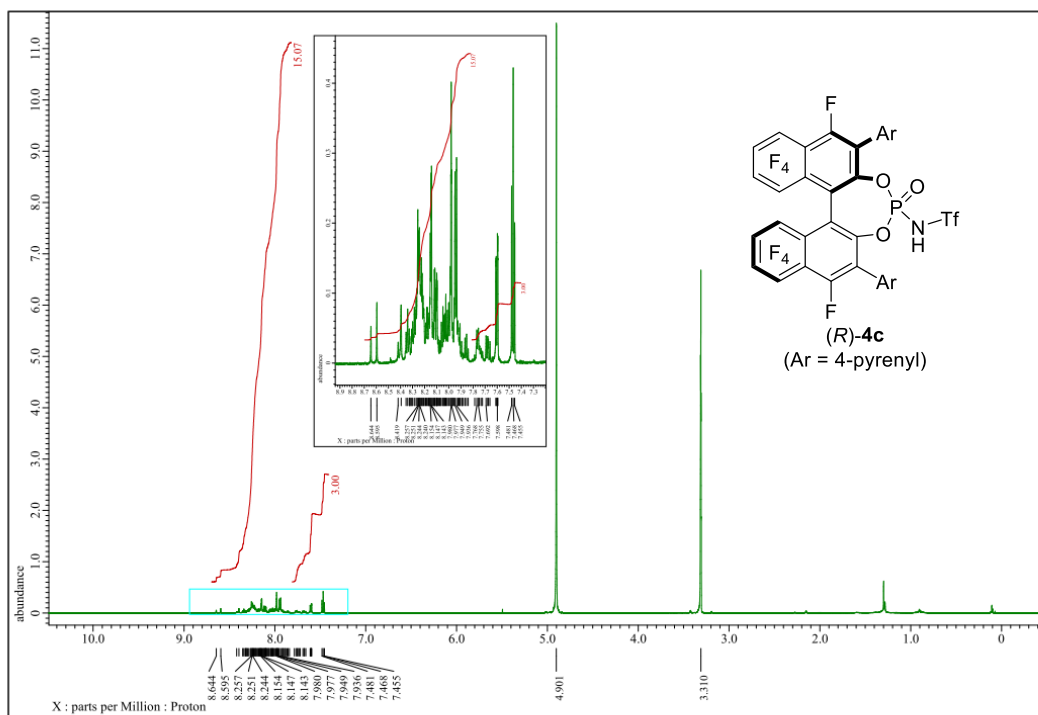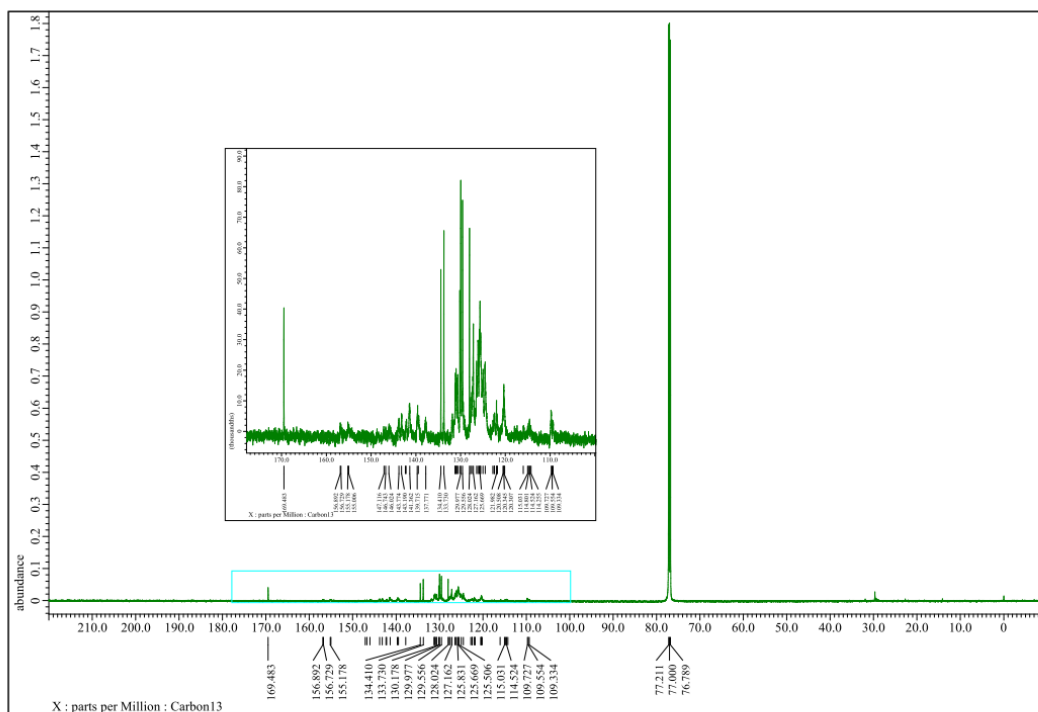

$^{31}\text{P}$  NMR (565 MHz) and  $^{19}\text{F}$  NMR (243 MHz) spectra of (*R*)-**4c**

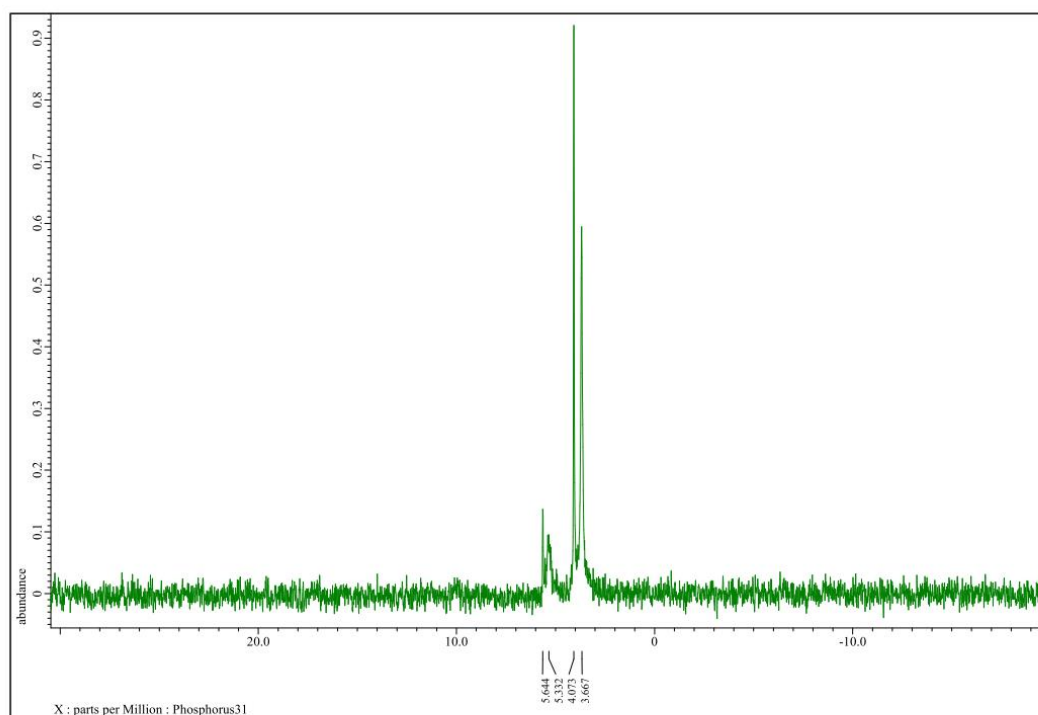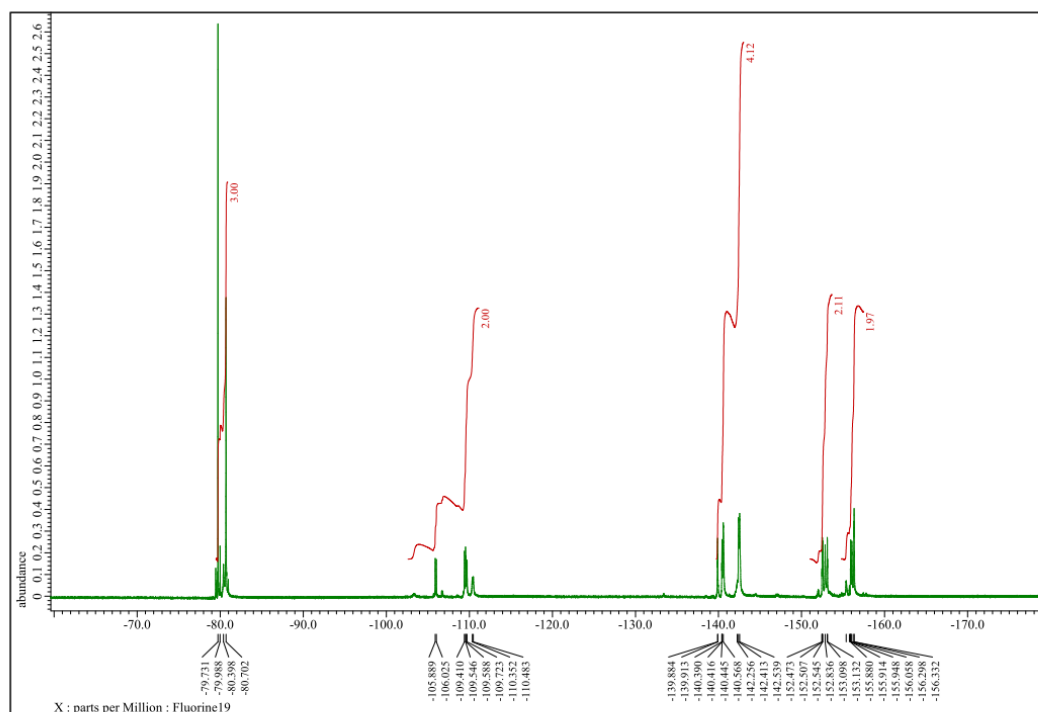

$^1\text{H}$  NMR (600 MHz) and  $^{13}\text{C}$  NMR (150 MHz) spectra of (*R*)-**4d**

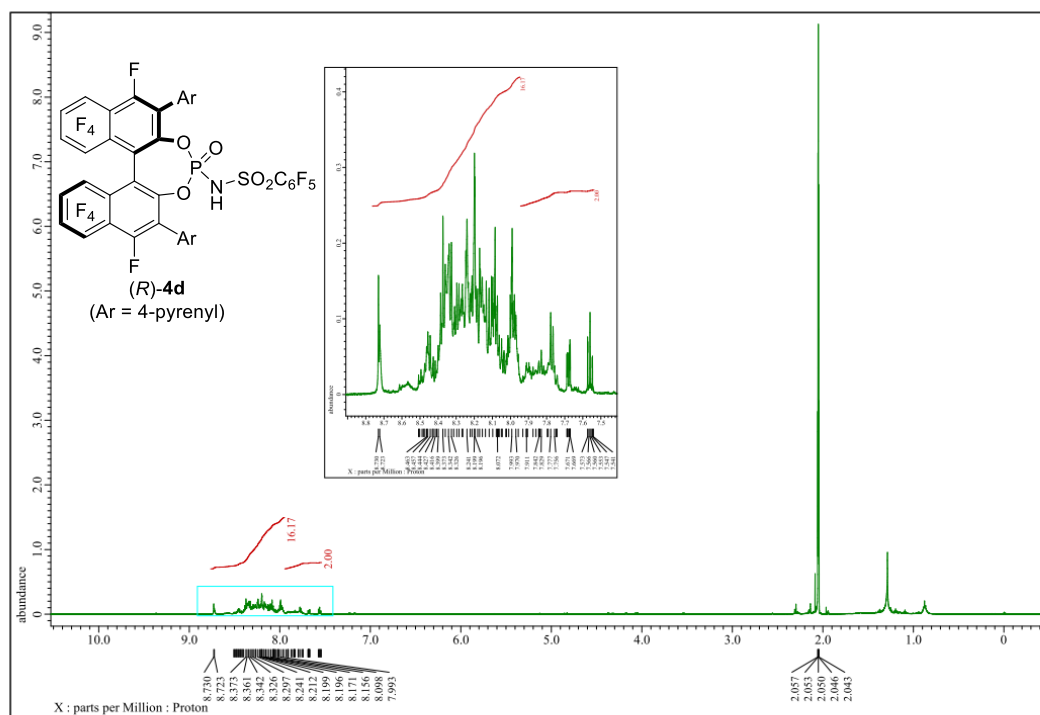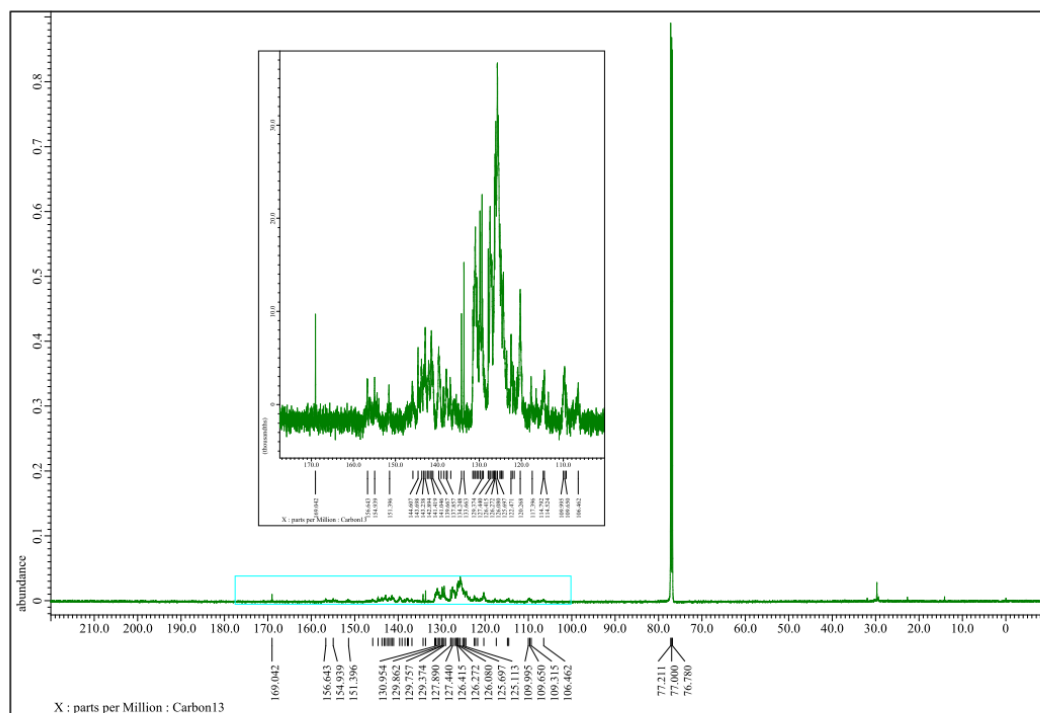

$^{31}\text{P}$  NMR (565 MHz) and  $^{19}\text{F}$  NMR (243 MHz) spectra of (*R*)-**4d**

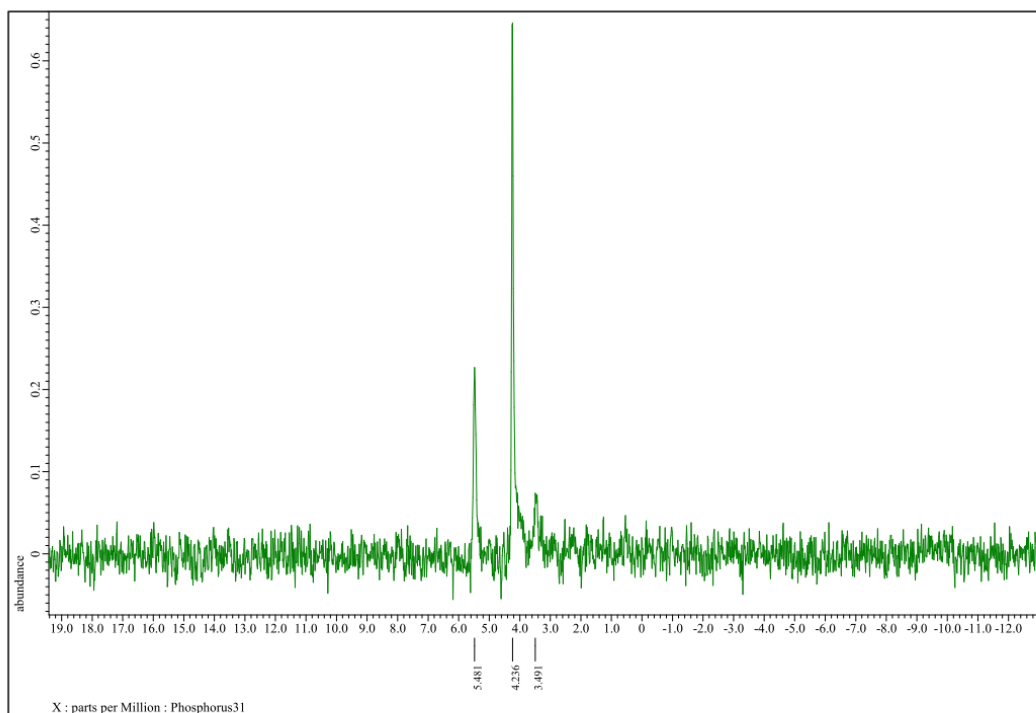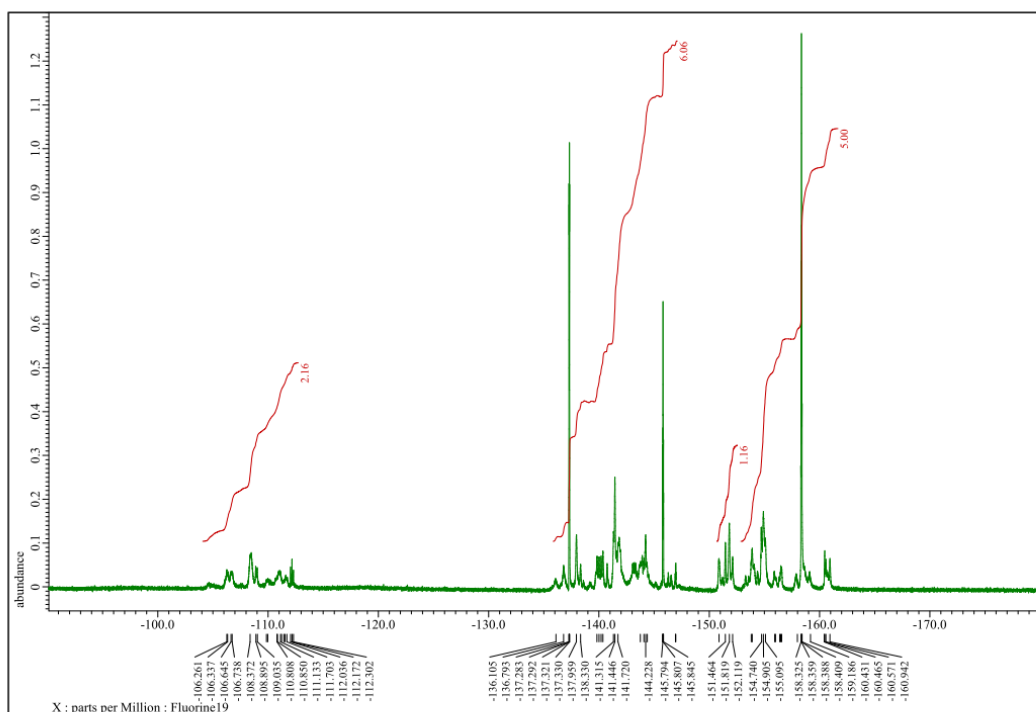

$^1\text{H}$  NMR (600 MHz) and  $^{13}\text{C}$  NMR (150 MHz) spectra of (*R*)-**4e**

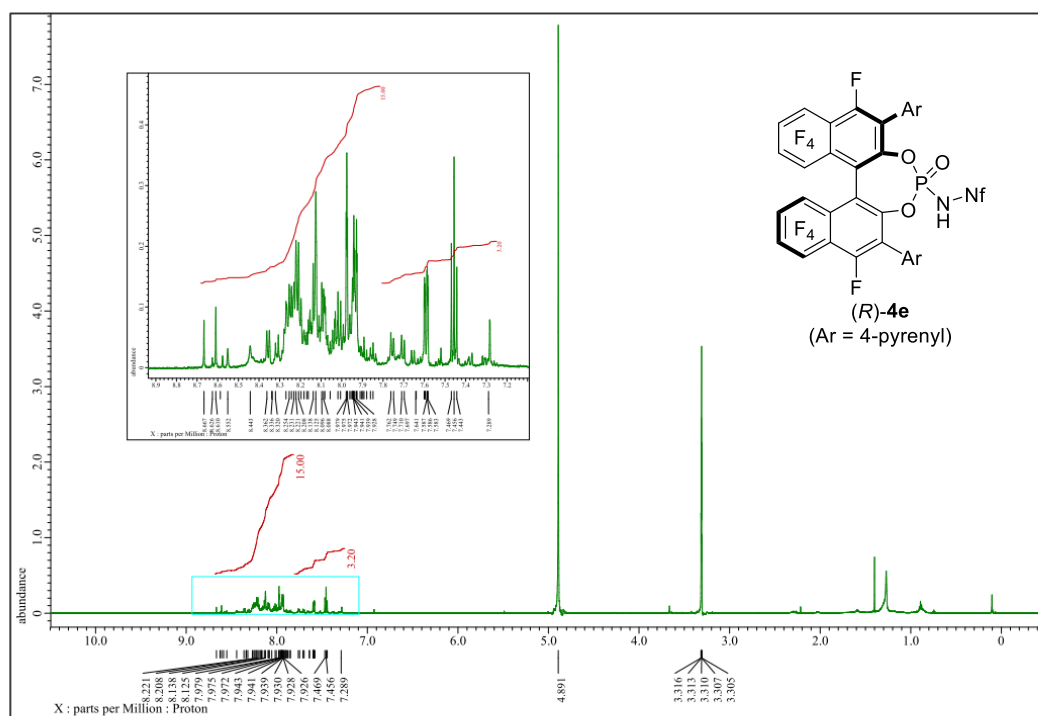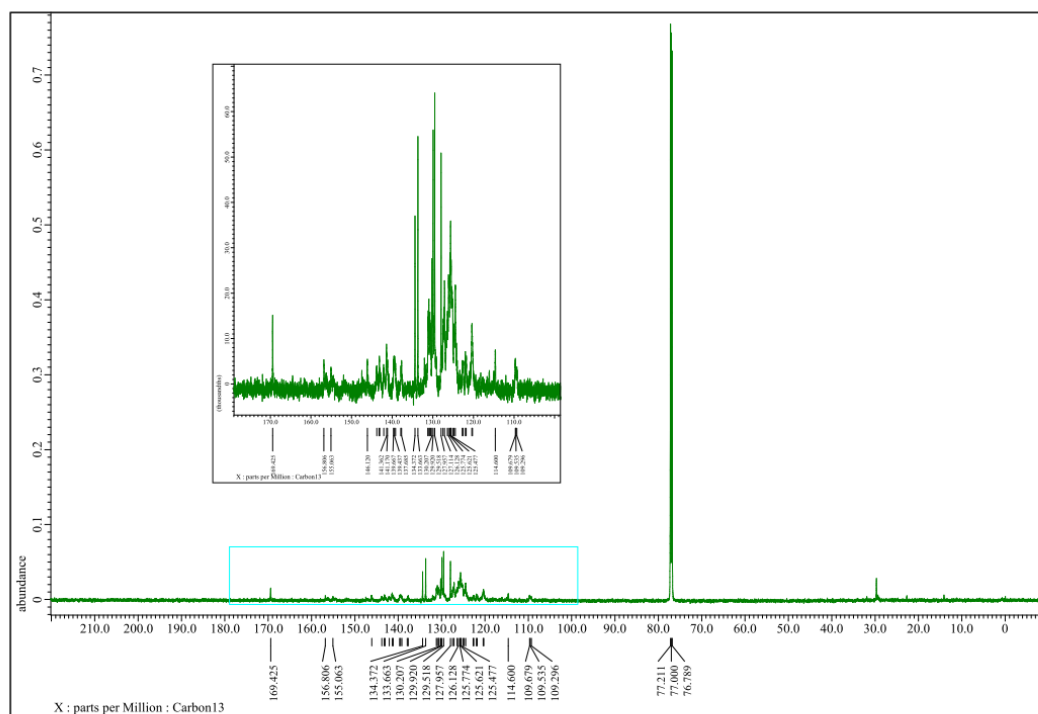

$^{31}\text{P}$  NMR (565 MHz) and  $^{19}\text{F}$  NMR (243 MHz) spectra of (*R*)-**4e**

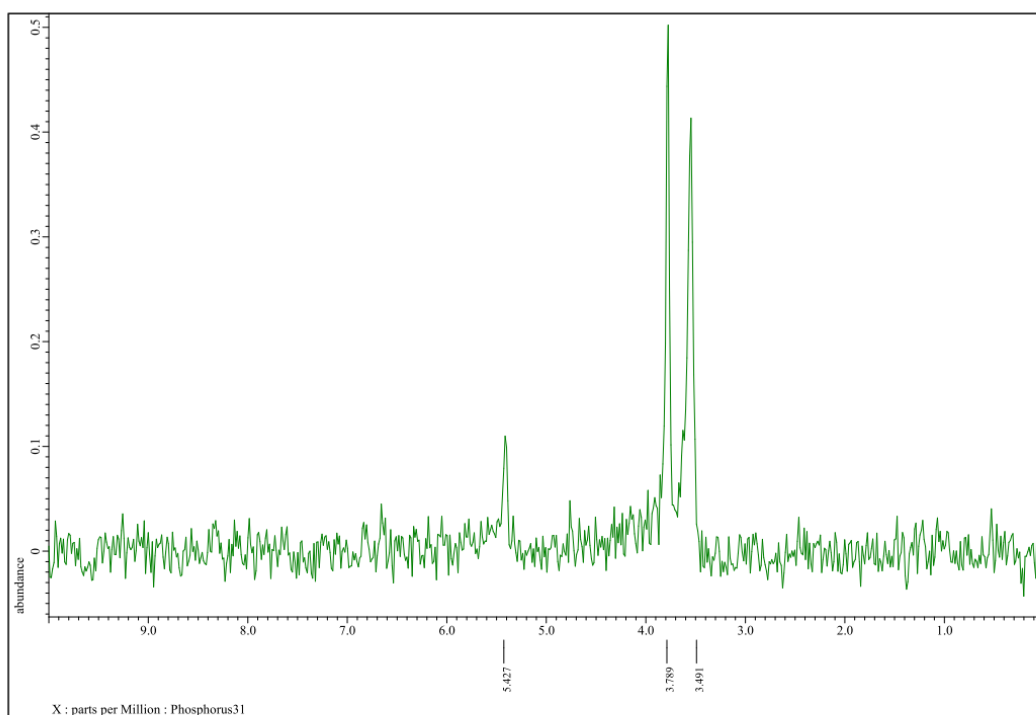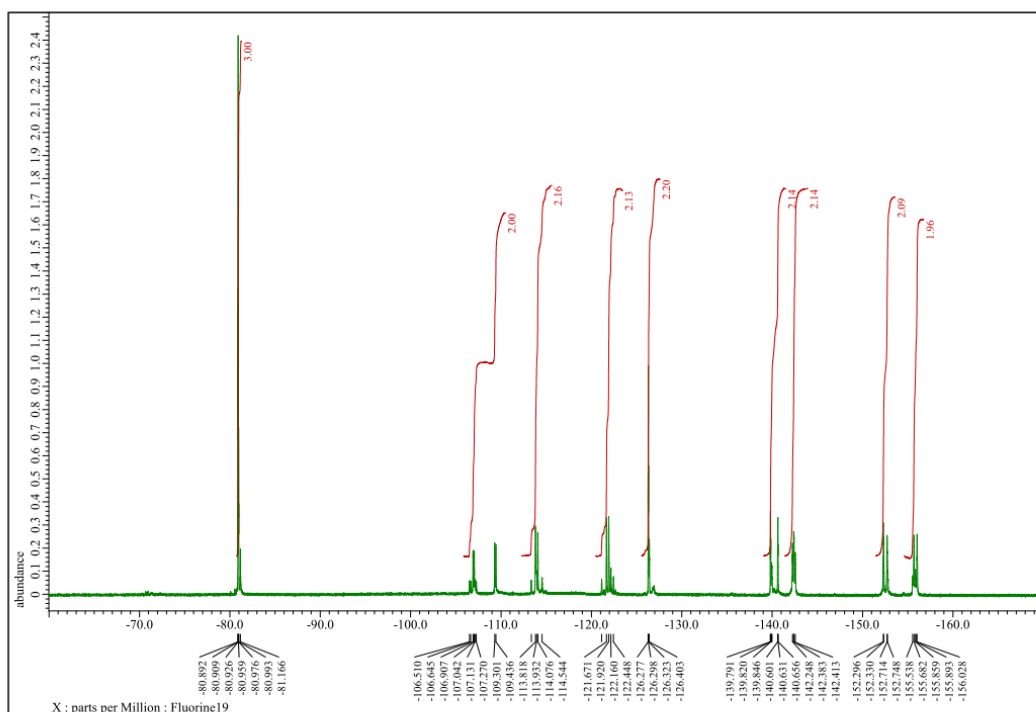

$^1\text{H}$  NMR (600 MHz) and  $^{13}\text{C}$  NMR (150 MHz) spectra of (*R*)-**4f**

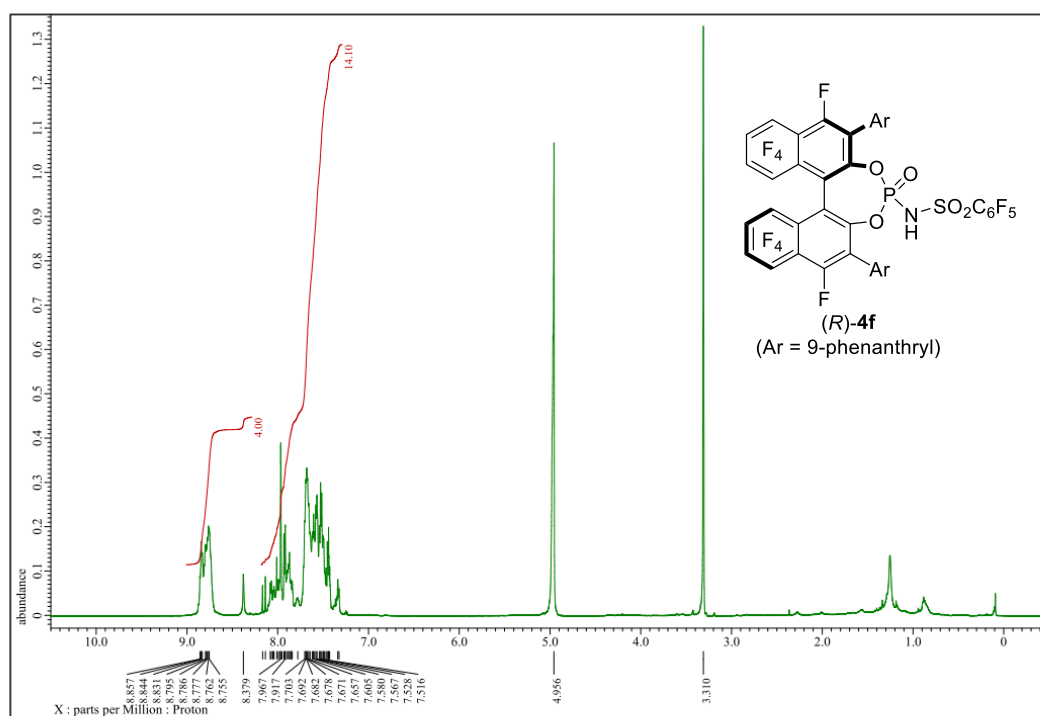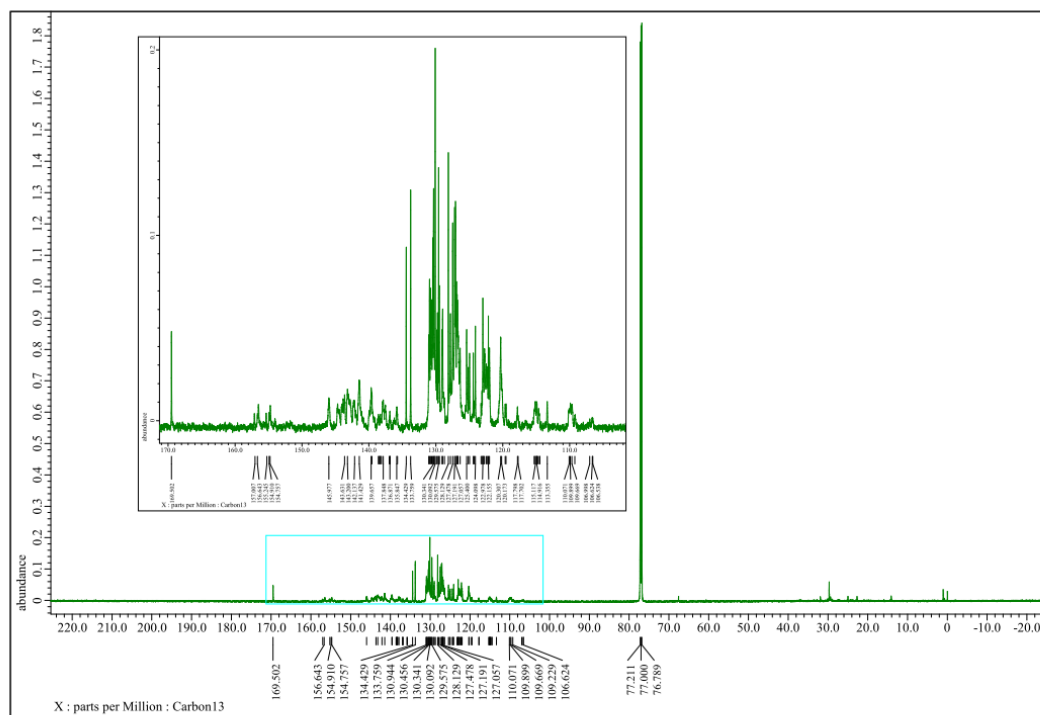

$^{31}\text{P}$  NMR (565 MHz) and  $^{19}\text{F}$  NMR (243 MHz) spectra of (*R*)-**4f**

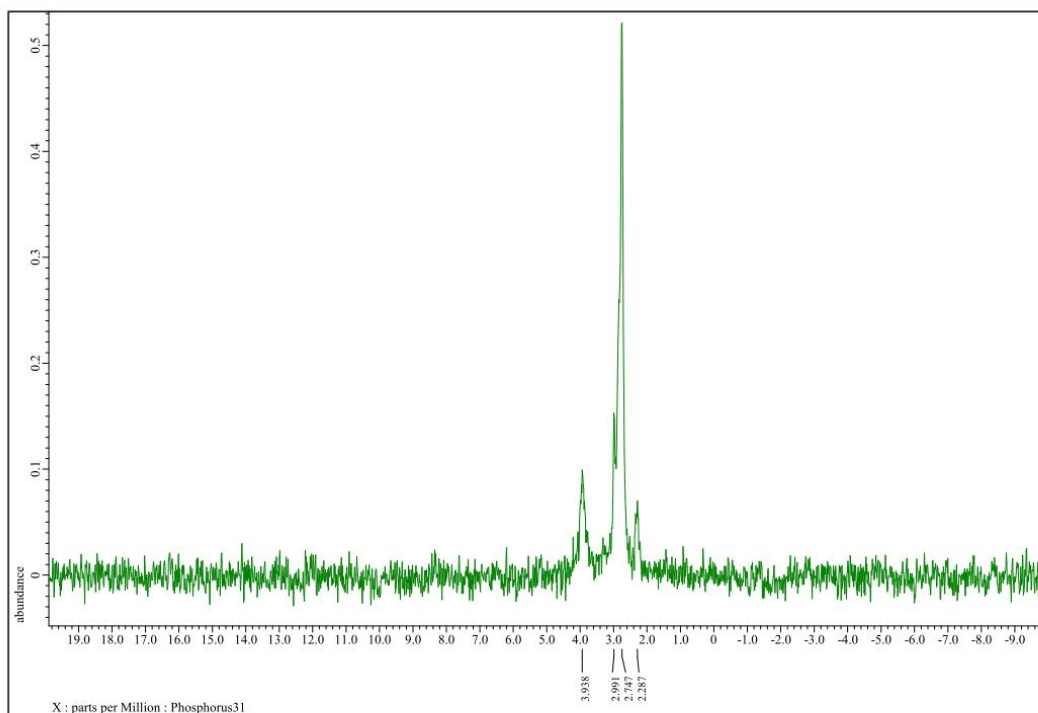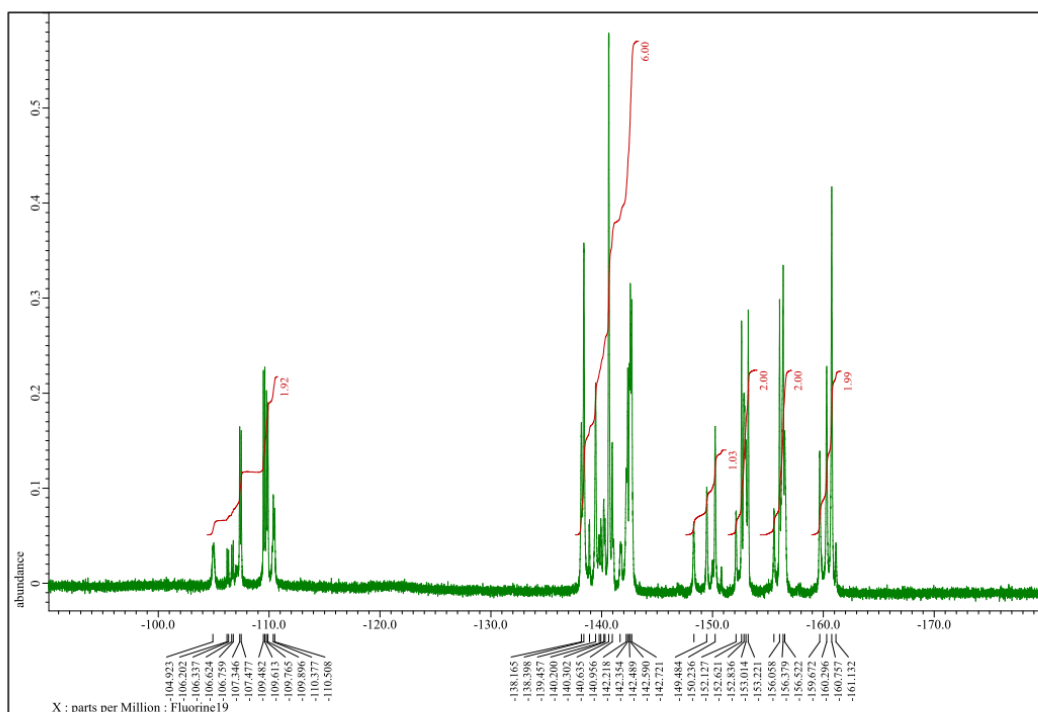

$^1\text{H}$  NMR (600 MHz) and  $^{13}\text{C}$  NMR (150 MHz) spectra of **3a**

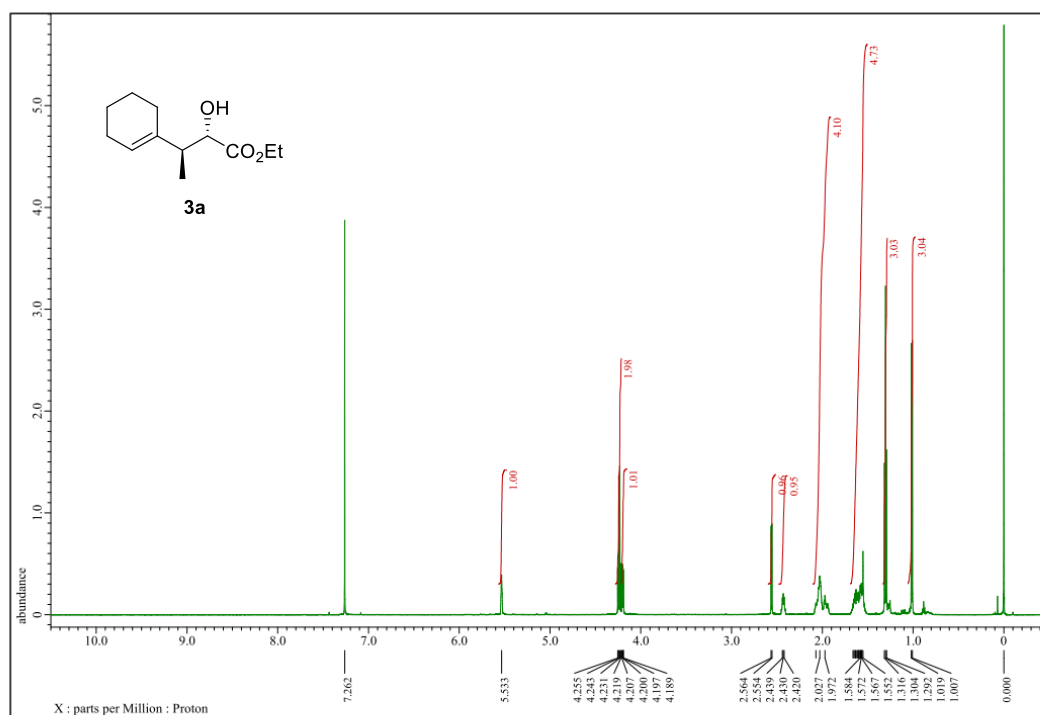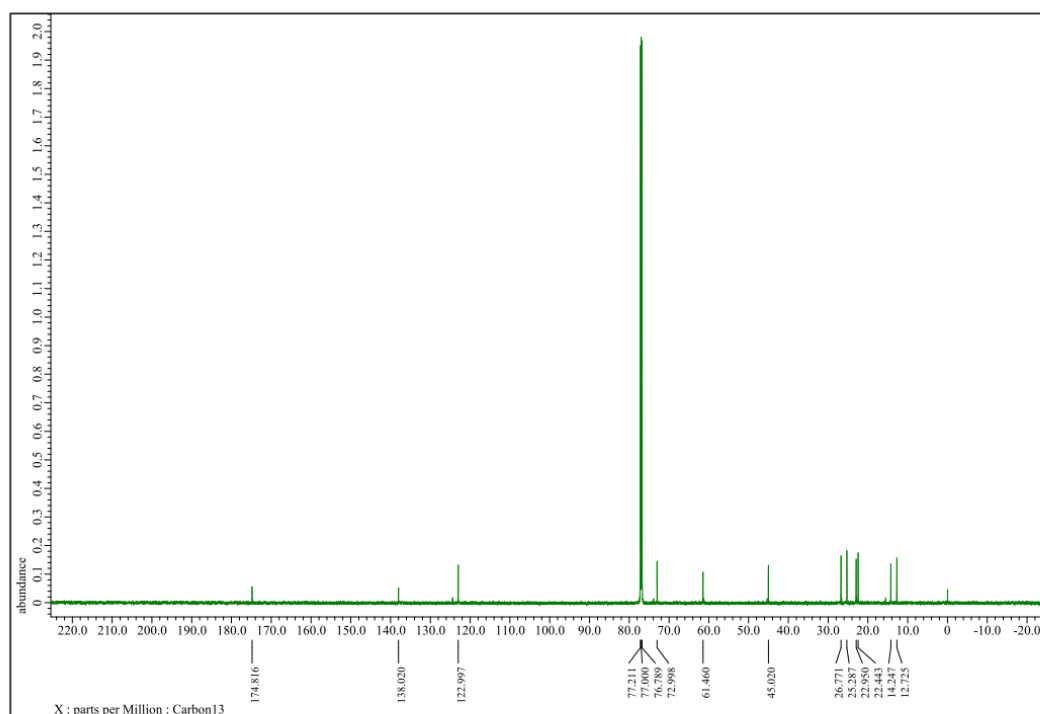

$^1\text{H}$  NMR (600 MHz) and  $^{13}\text{C}$  NMR (150 MHz) spectra of **3b**

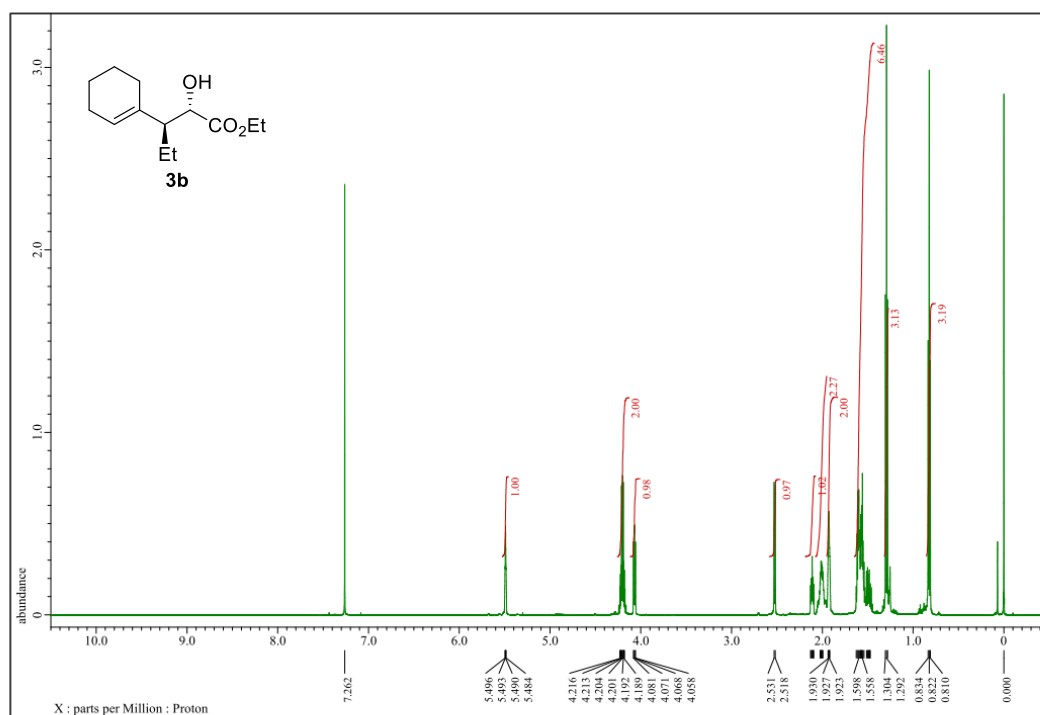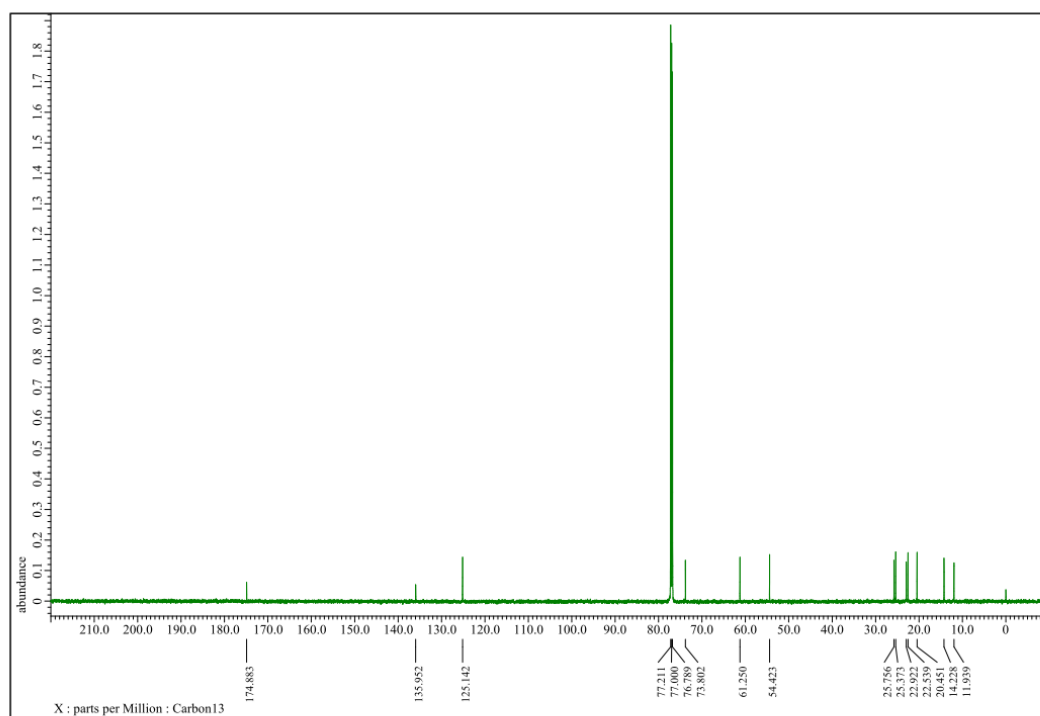

$^1\text{H}$  NMR (600 MHz) and  $^{13}\text{C}$  NMR (150 MHz) spectra of **3c**

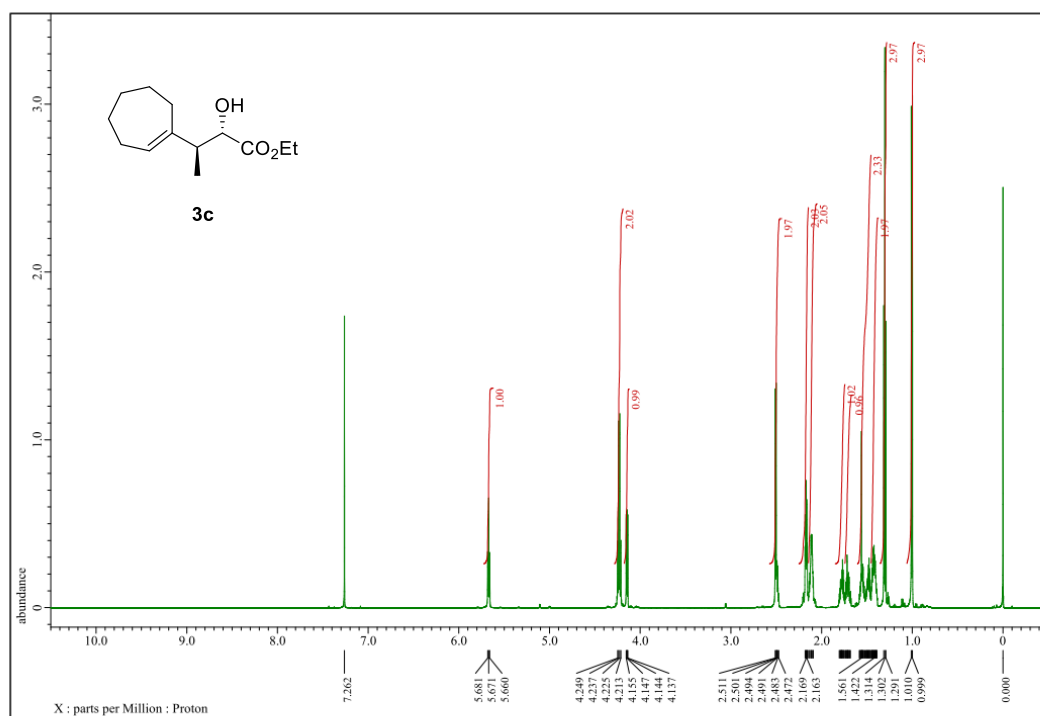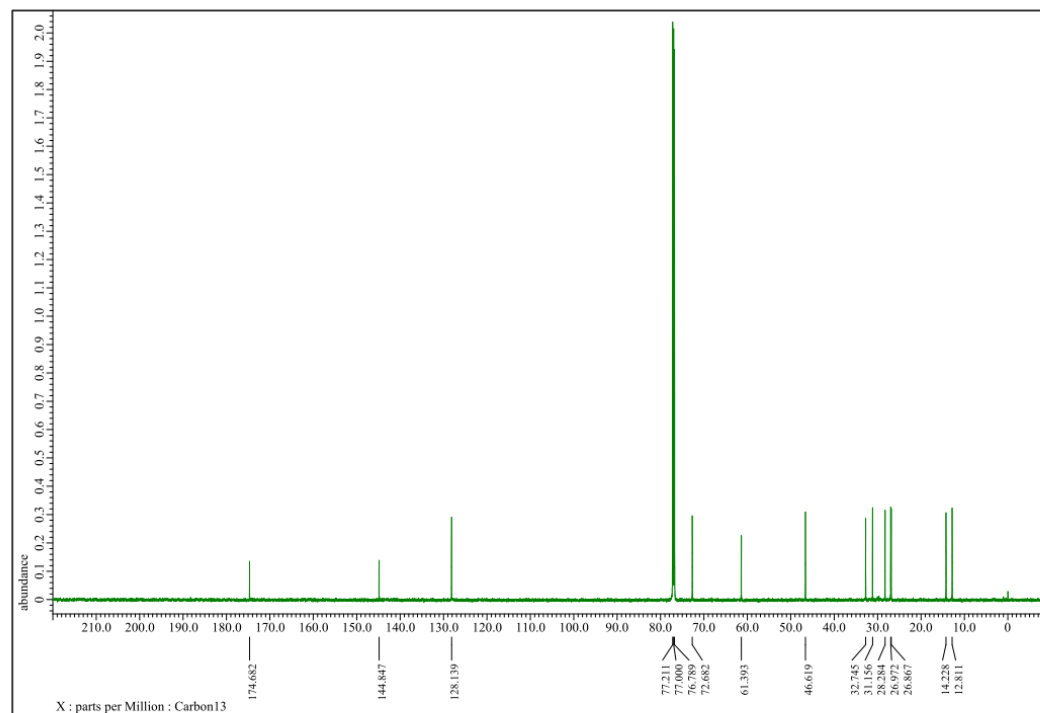

$^1\text{H}$  NMR (600 MHz) and  $^{13}\text{C}$  NMR (150 MHz) spectra of **3d**

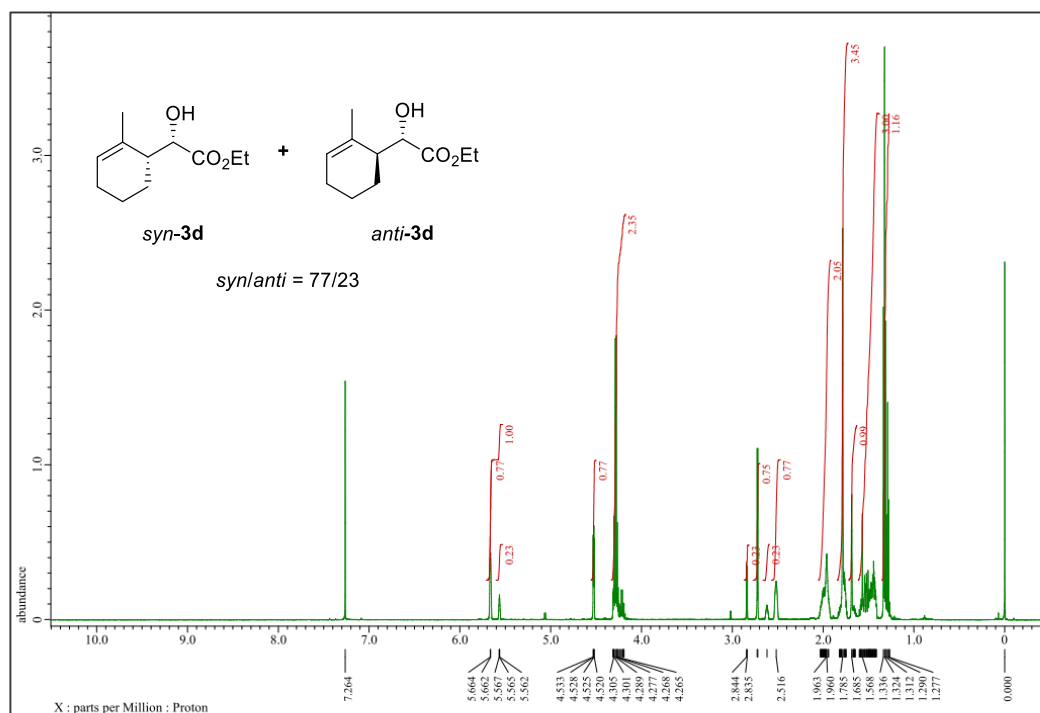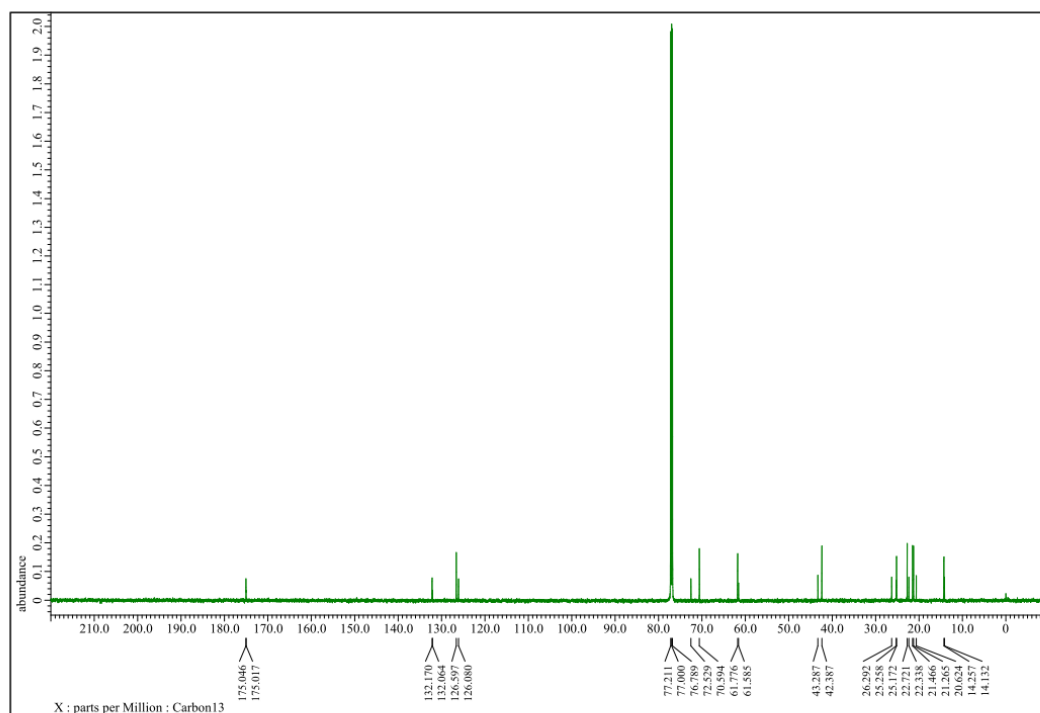

$^1\text{H}$  NMR (600 MHz) and  $^{13}\text{C}$  NMR (150 MHz) spectra of **3'e**

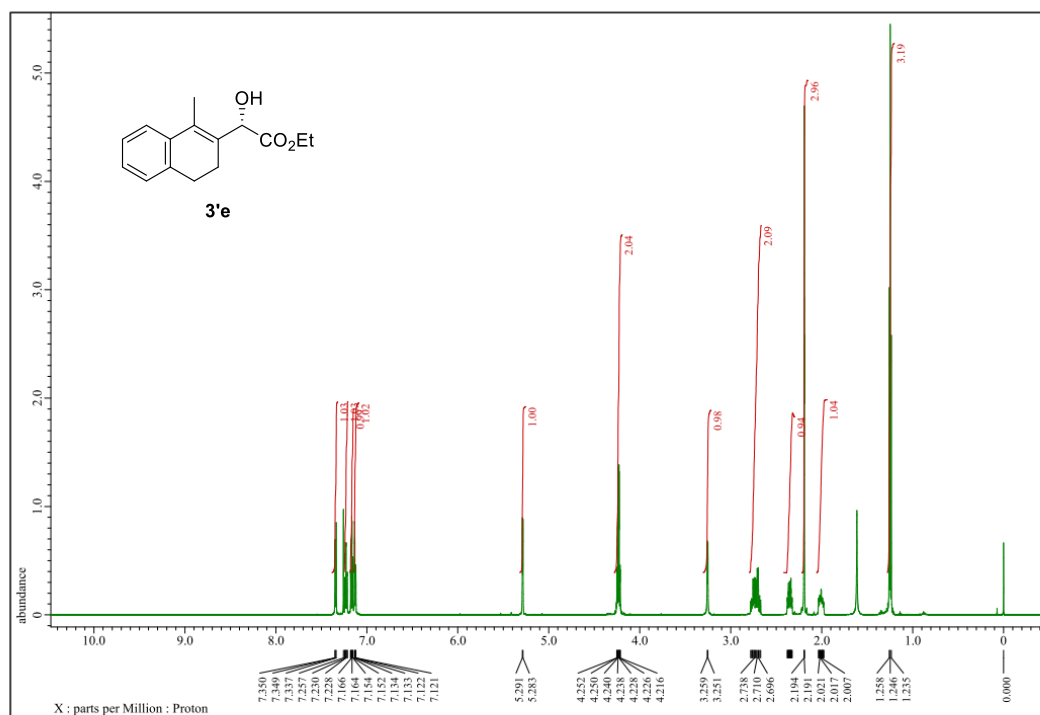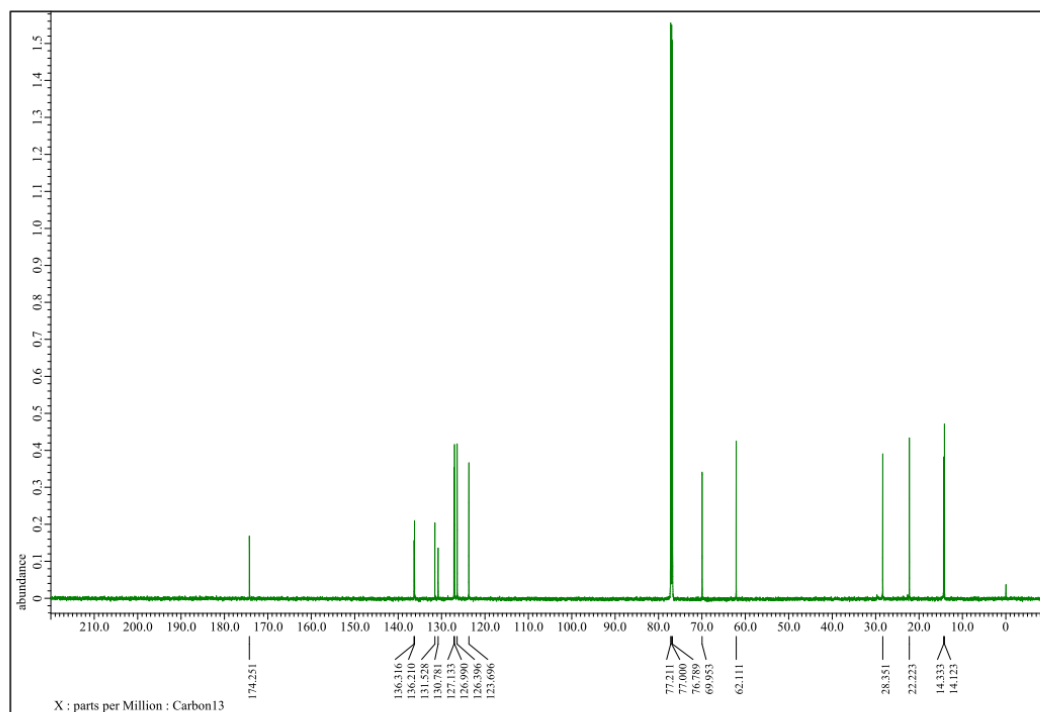

$^1\text{H}$  NMR (600 MHz) and  $^{13}\text{C}$  NMR (150 MHz) spectra of **3'f**

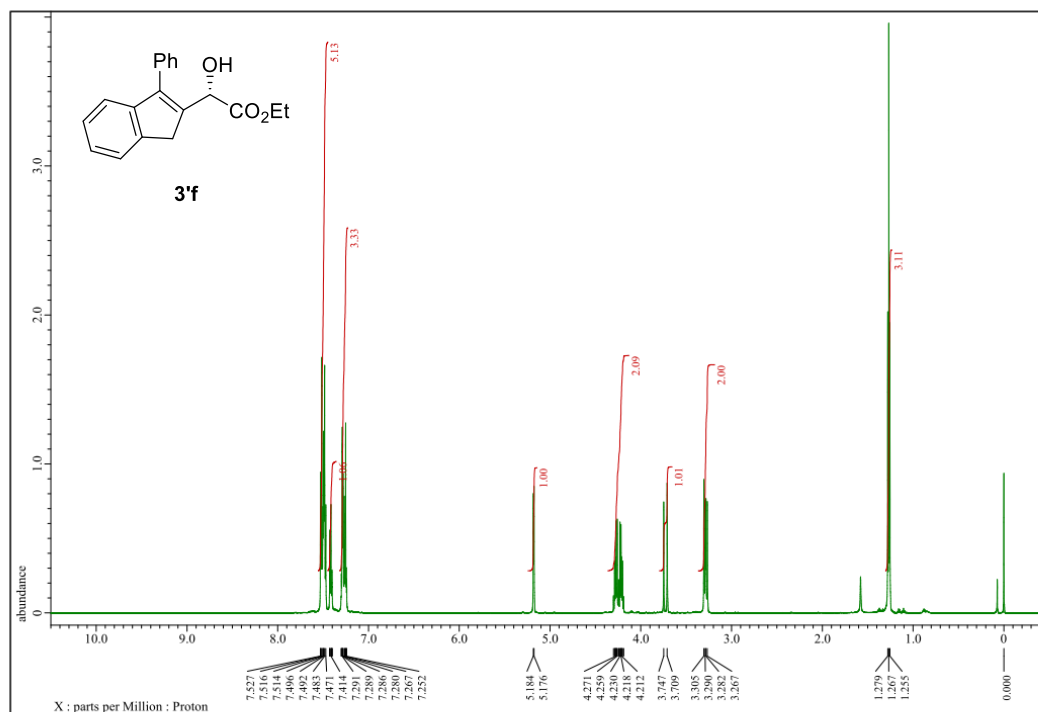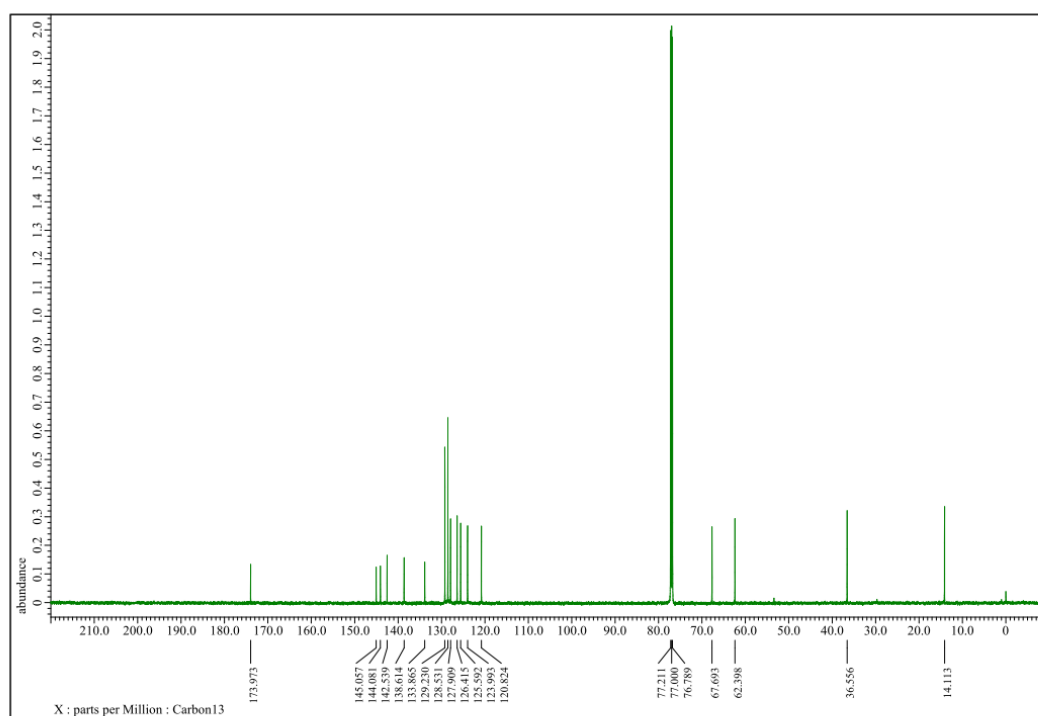

$^1\text{H}$  NMR (600 MHz) and  $^{13}\text{C}$  NMR (150 MHz) spectra of **3'g**

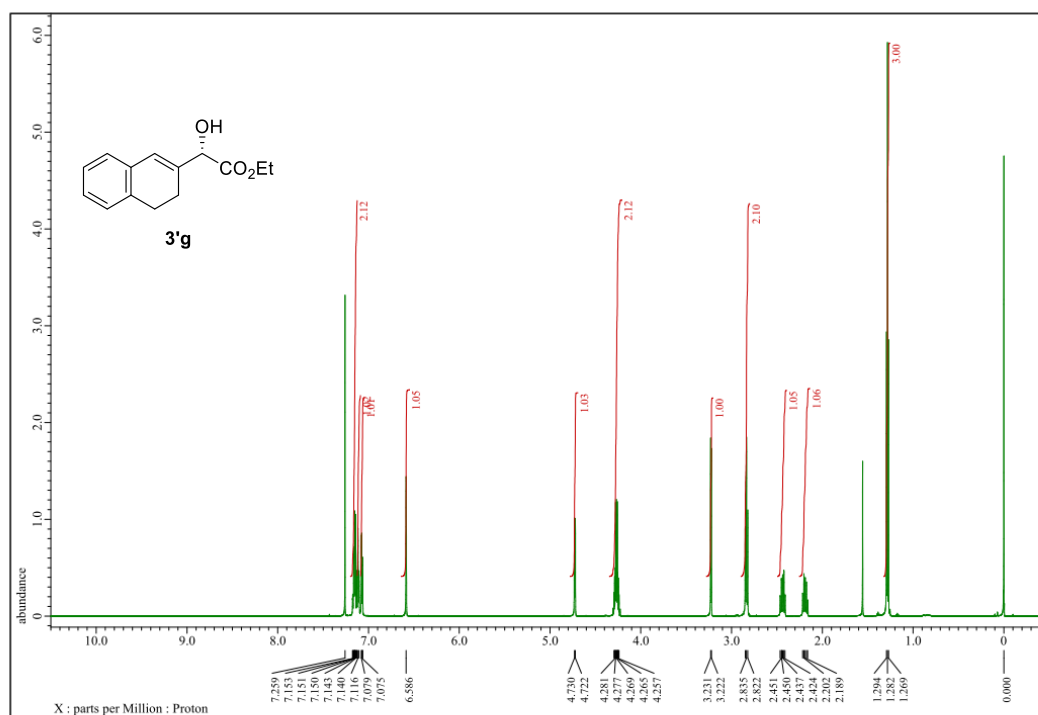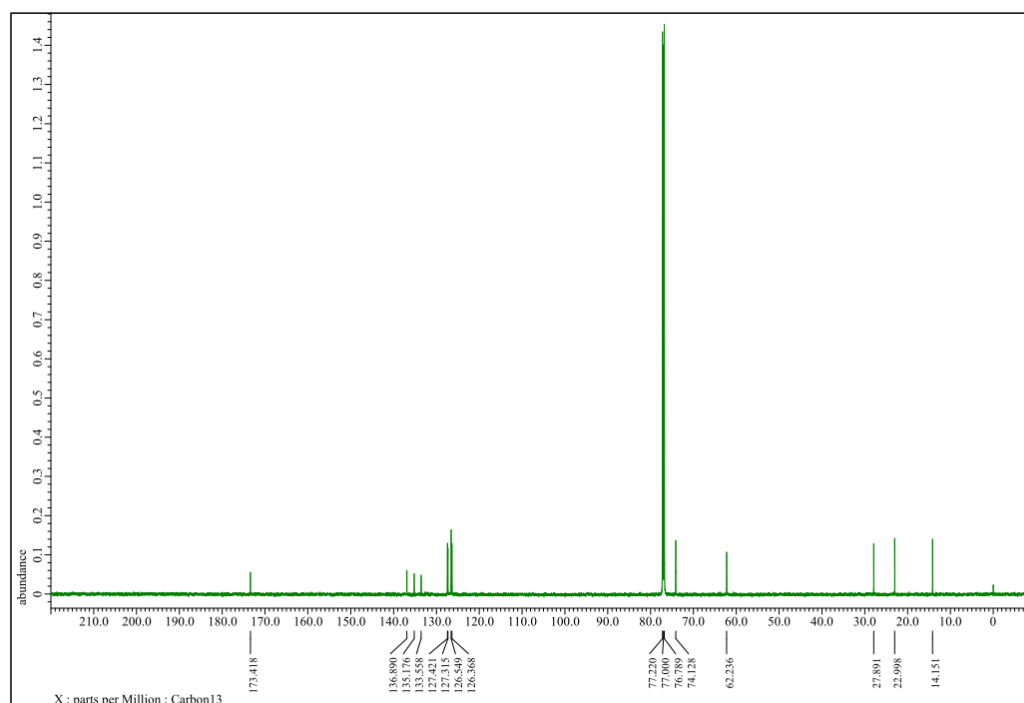

$^1\text{H}$  NMR (600 MHz) and  $^{13}\text{C}$  NMR (150 MHz) spectra of **3'h**

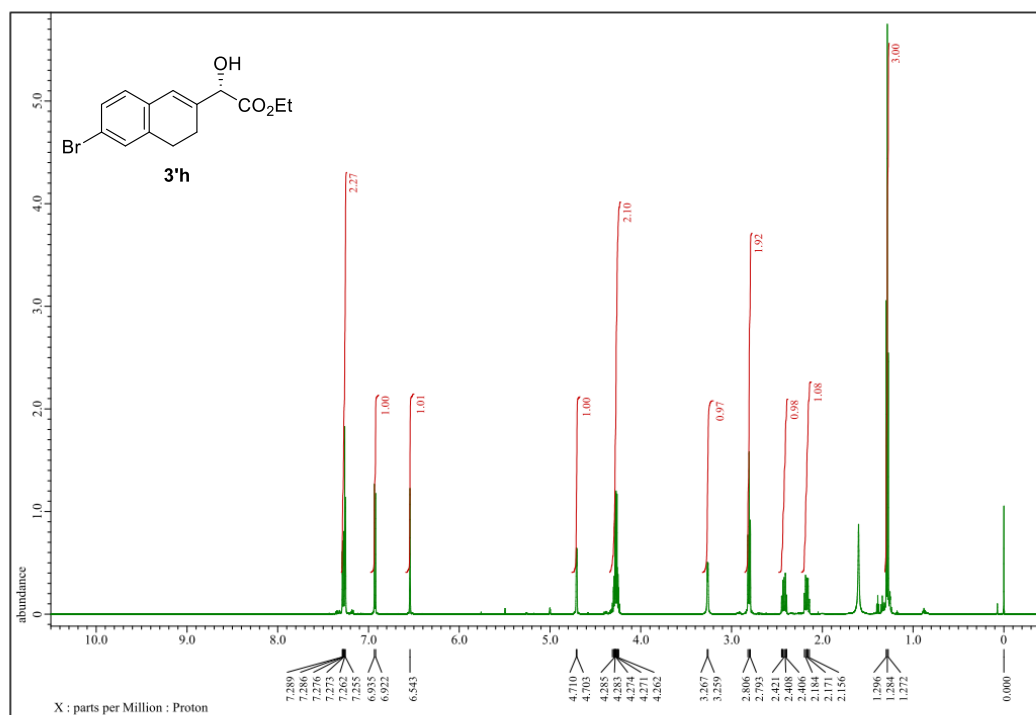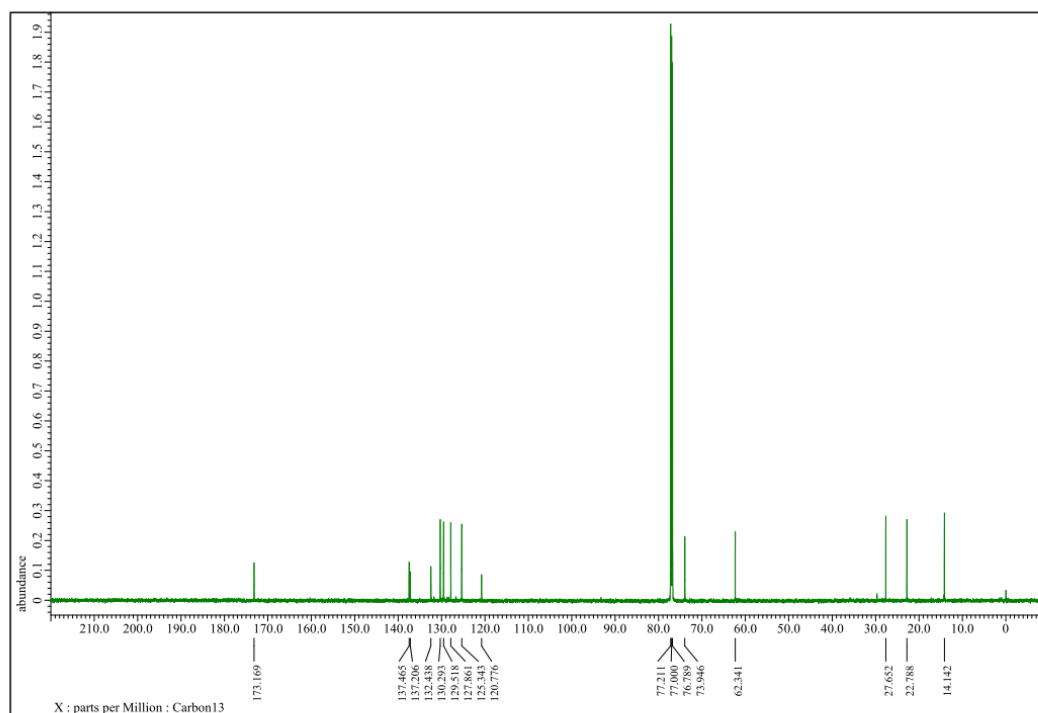

$^1\text{H}$  NMR (600 MHz) and  $^{13}\text{C}$  NMR (150 MHz) spectra of **3'i**

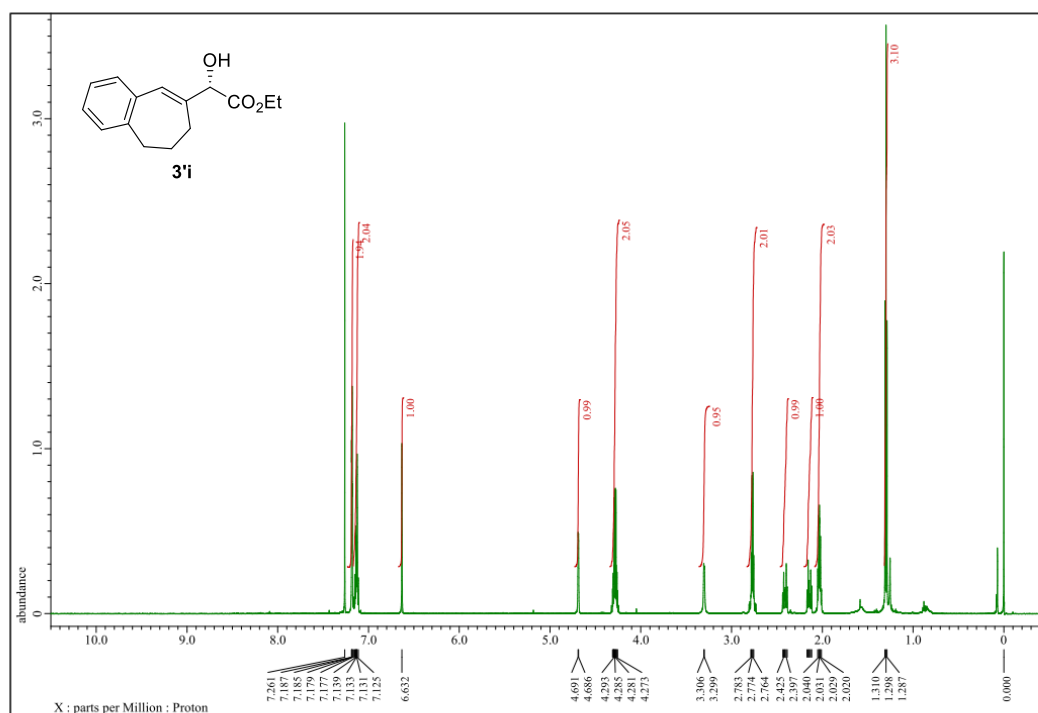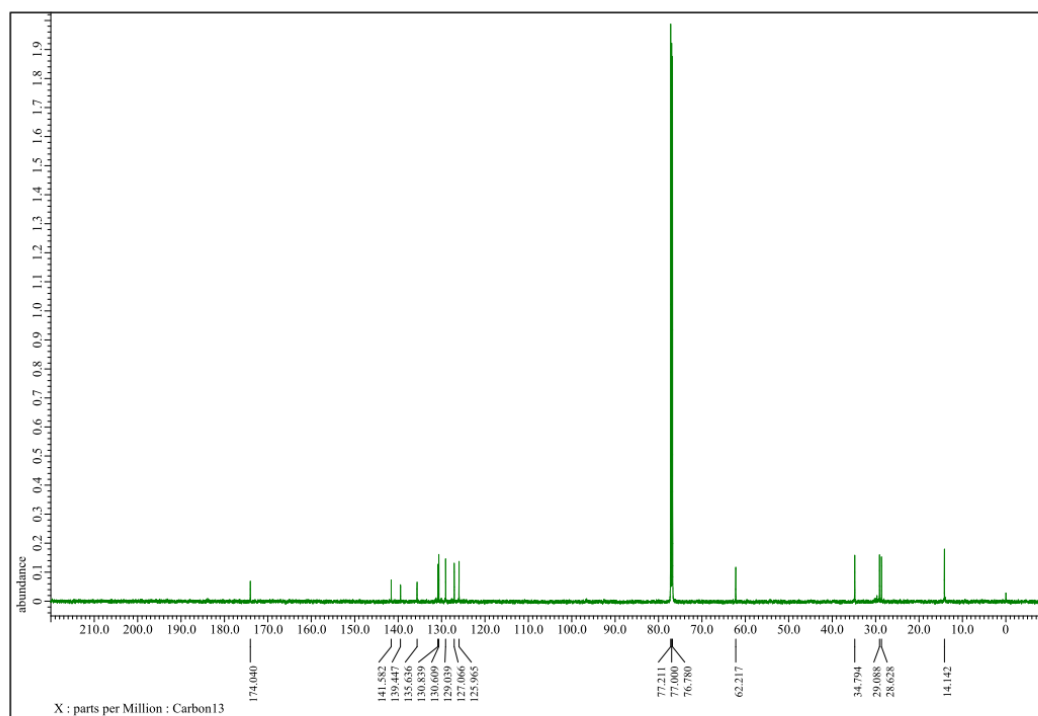

$^1\text{H}$  NMR (600 MHz) and  $^{13}\text{C}$  NMR (150 MHz) spectra of **3'j**

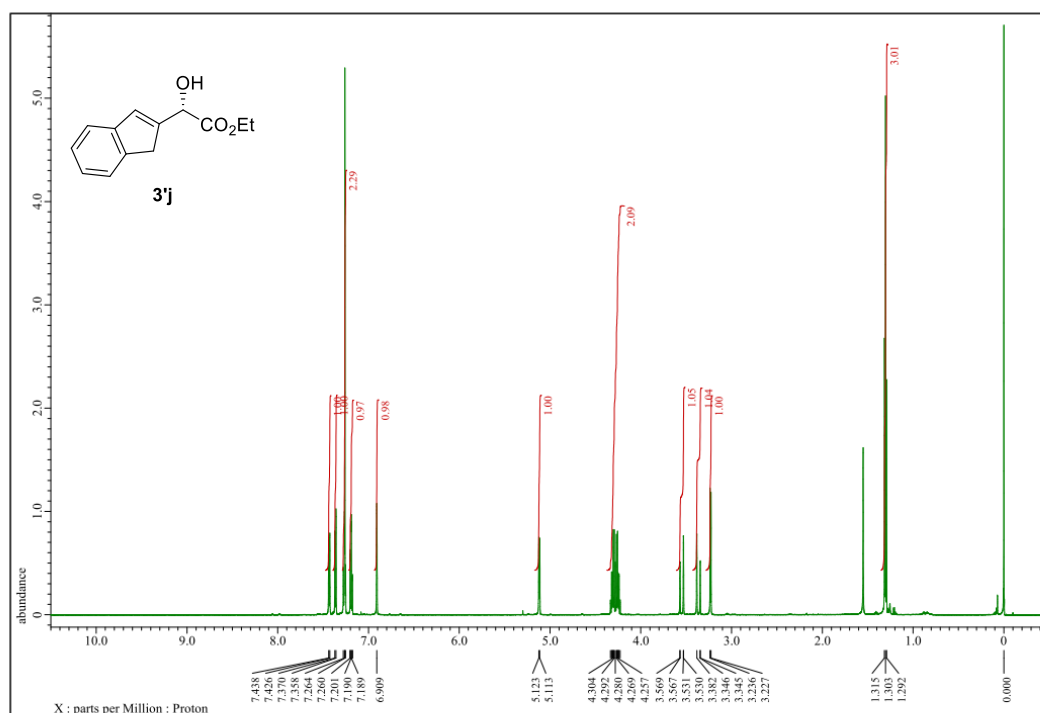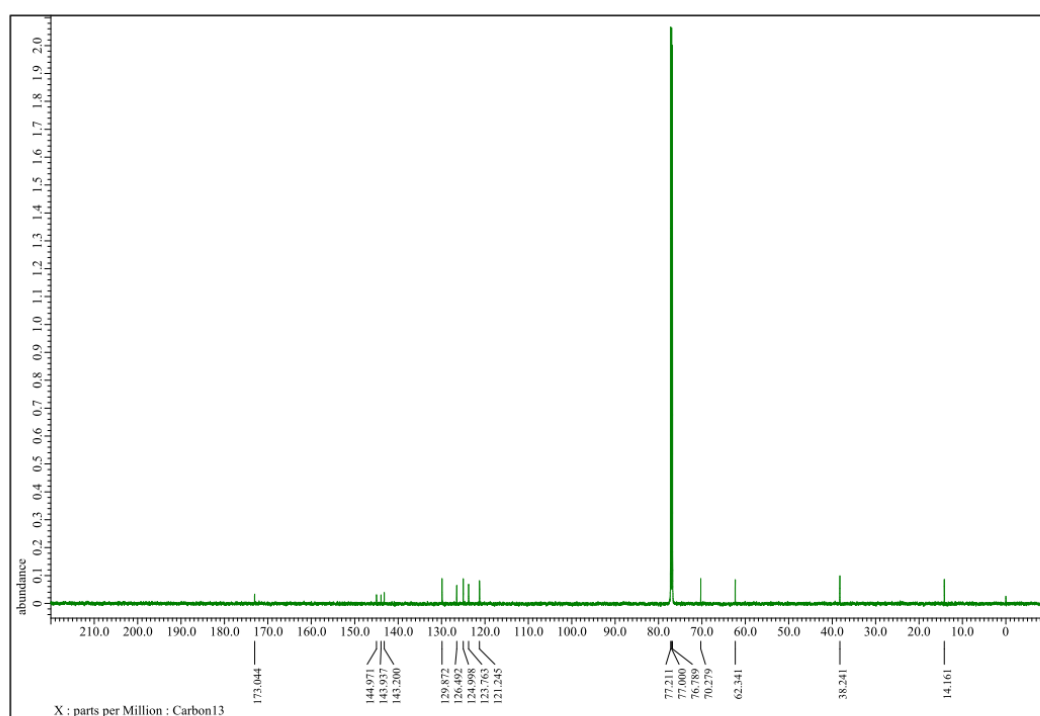

$^1\text{H}$  NMR (600 MHz) and  $^{13}\text{C}$  NMR (150 MHz) spectra of **3'k**

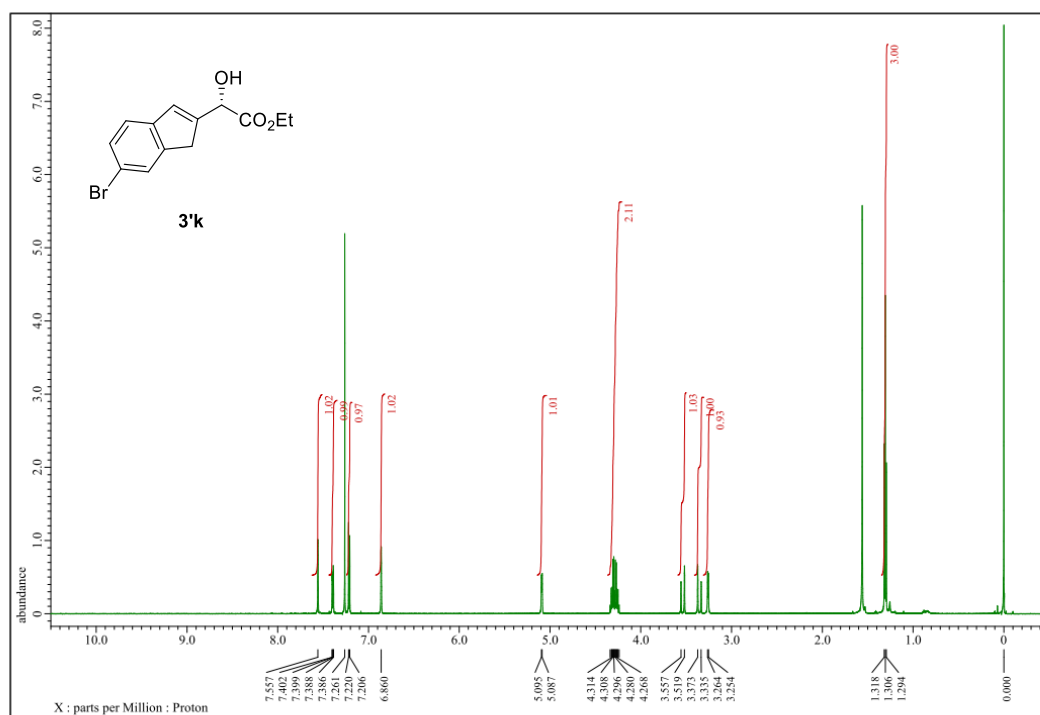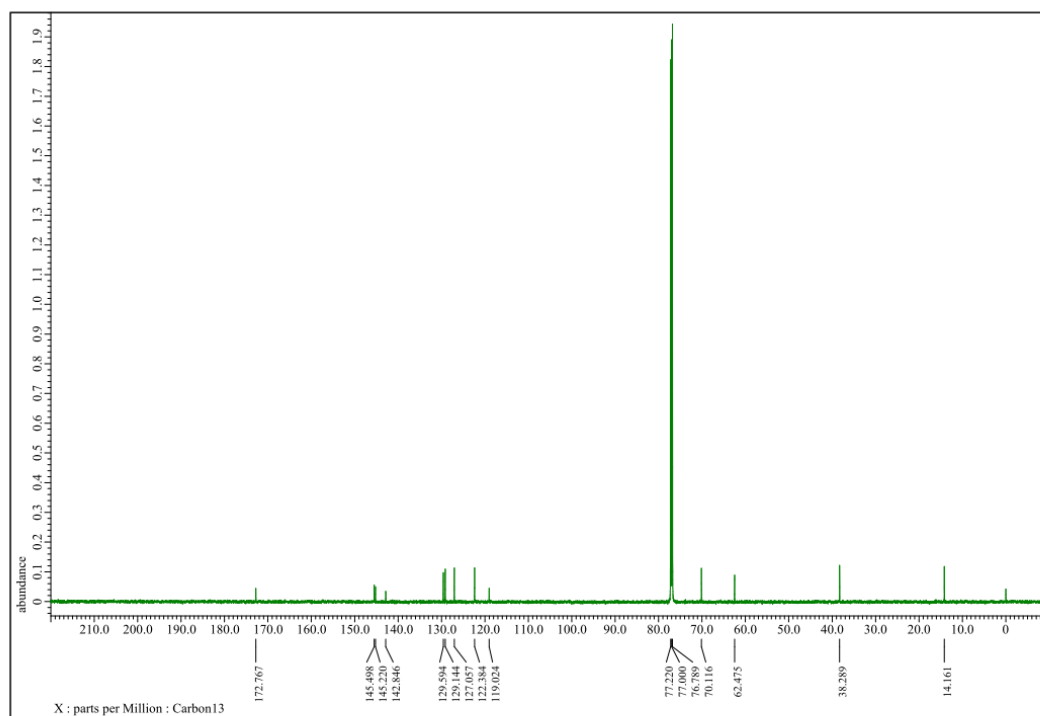

$^1\text{H}$  NMR (600 MHz) and  $^{13}\text{C}$  NMR (150 MHz) spectra of **S4**

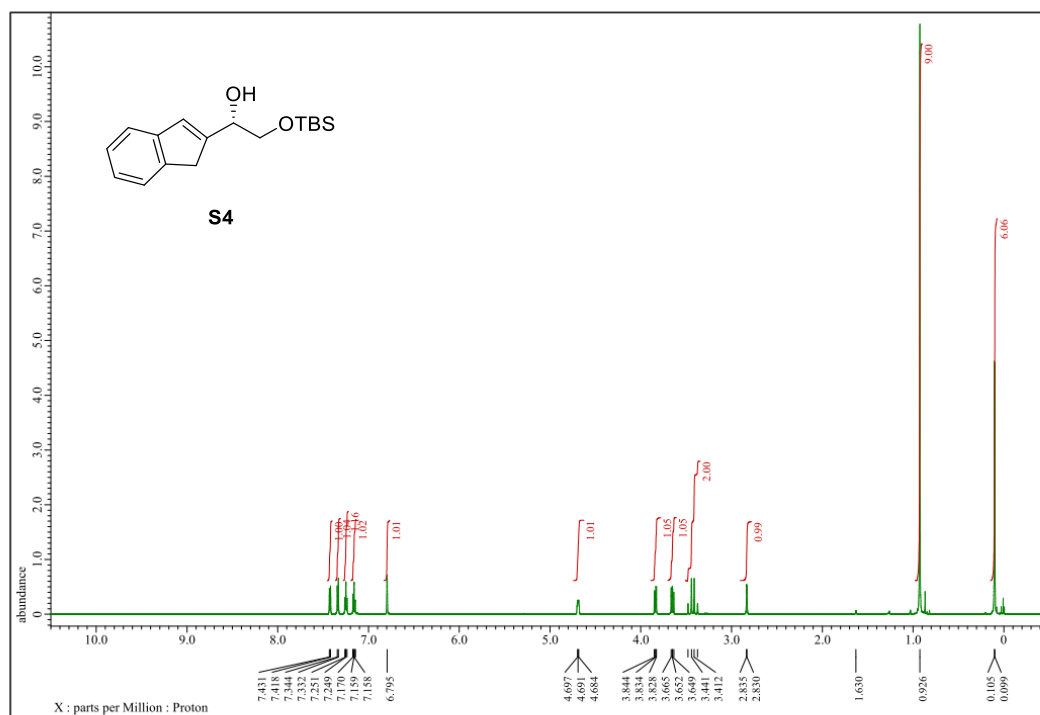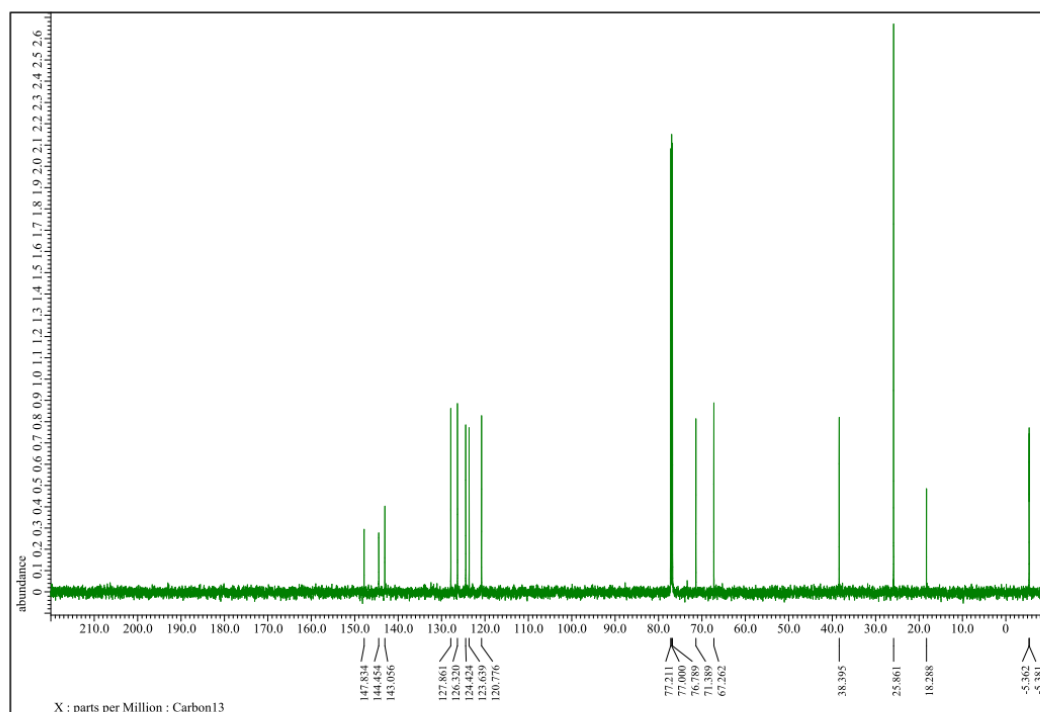

## 7. HPLC charts

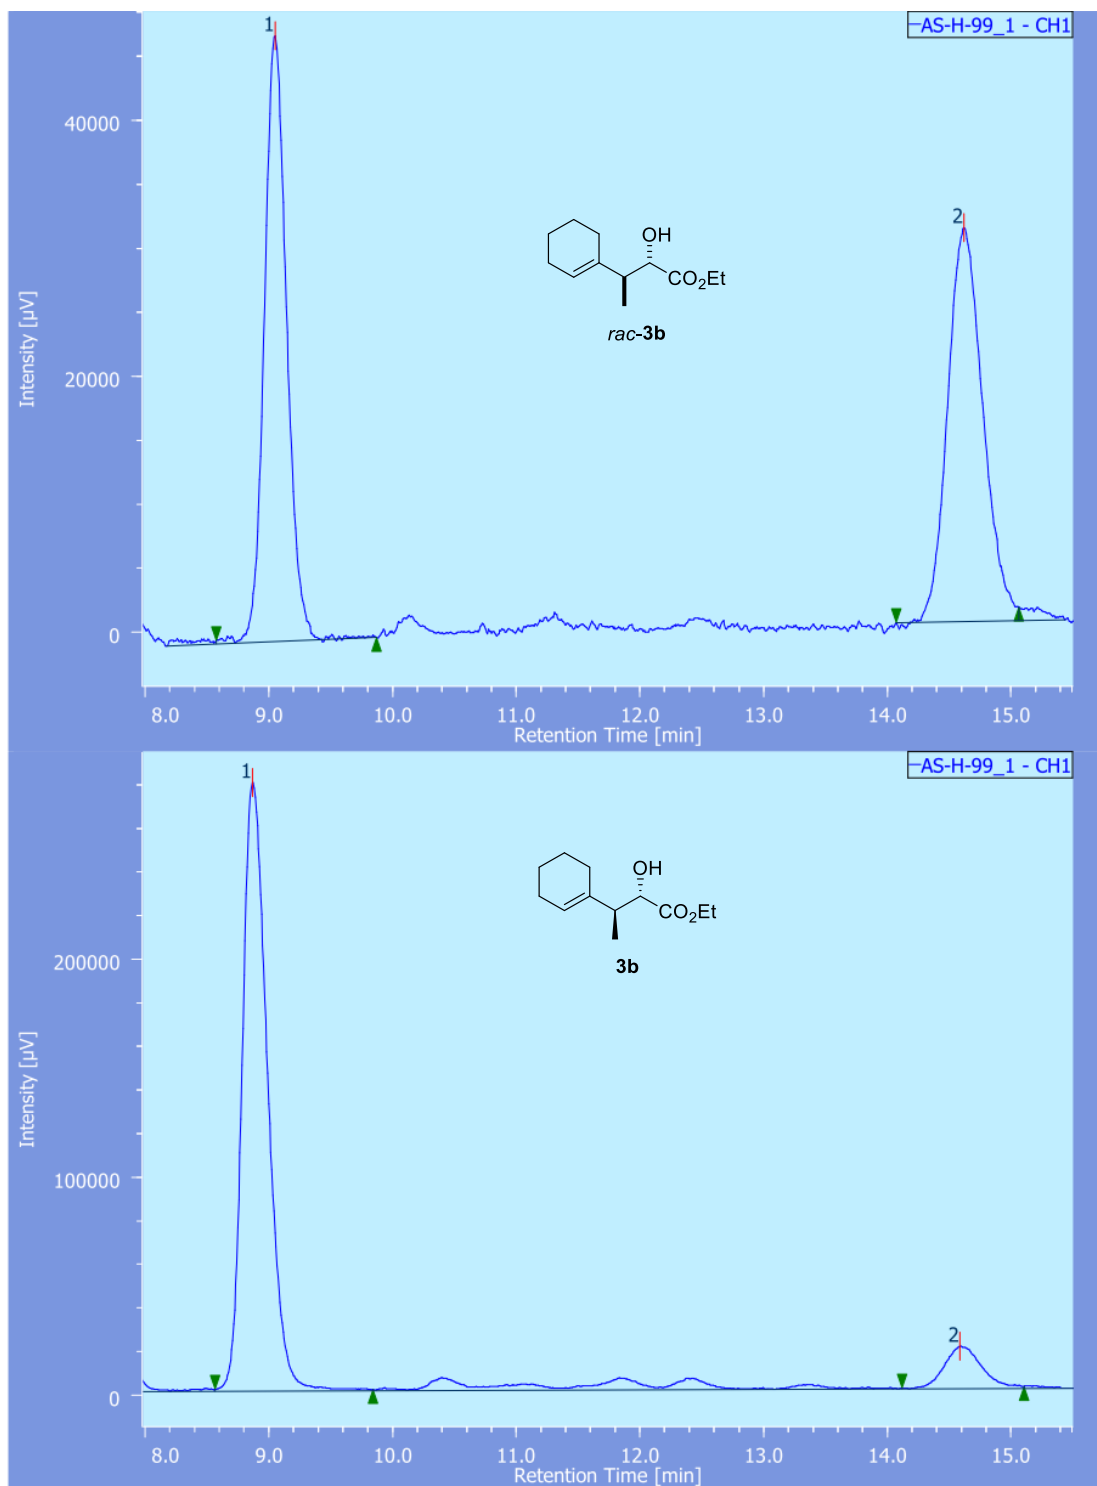

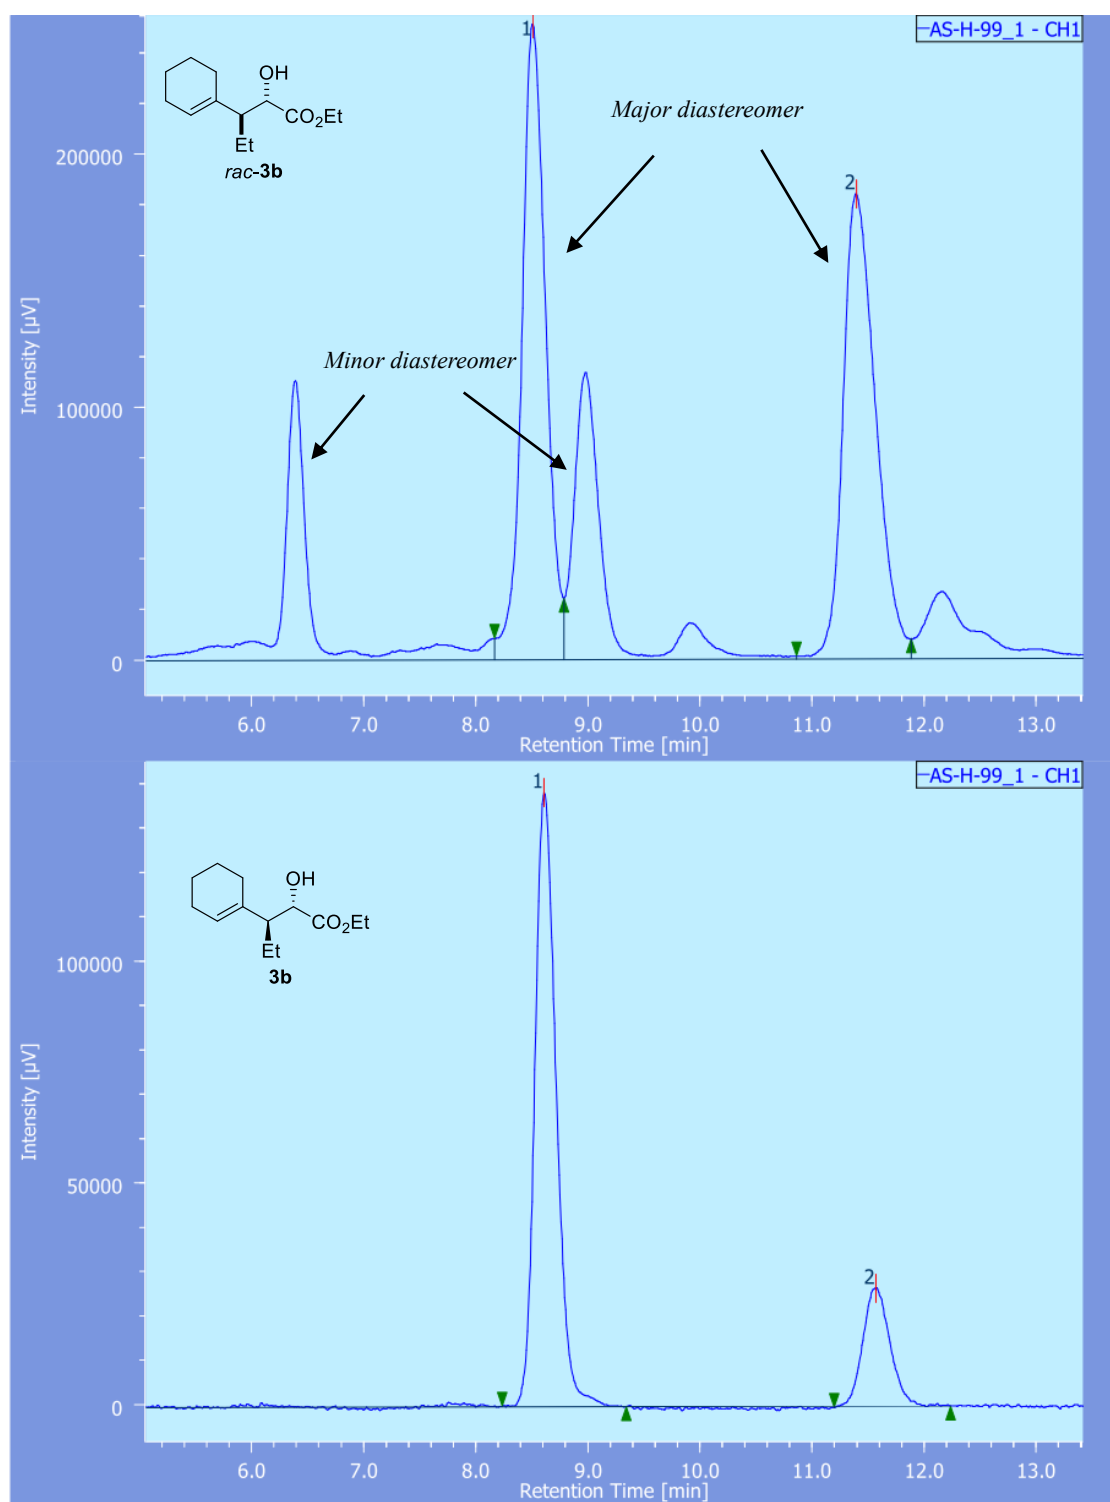

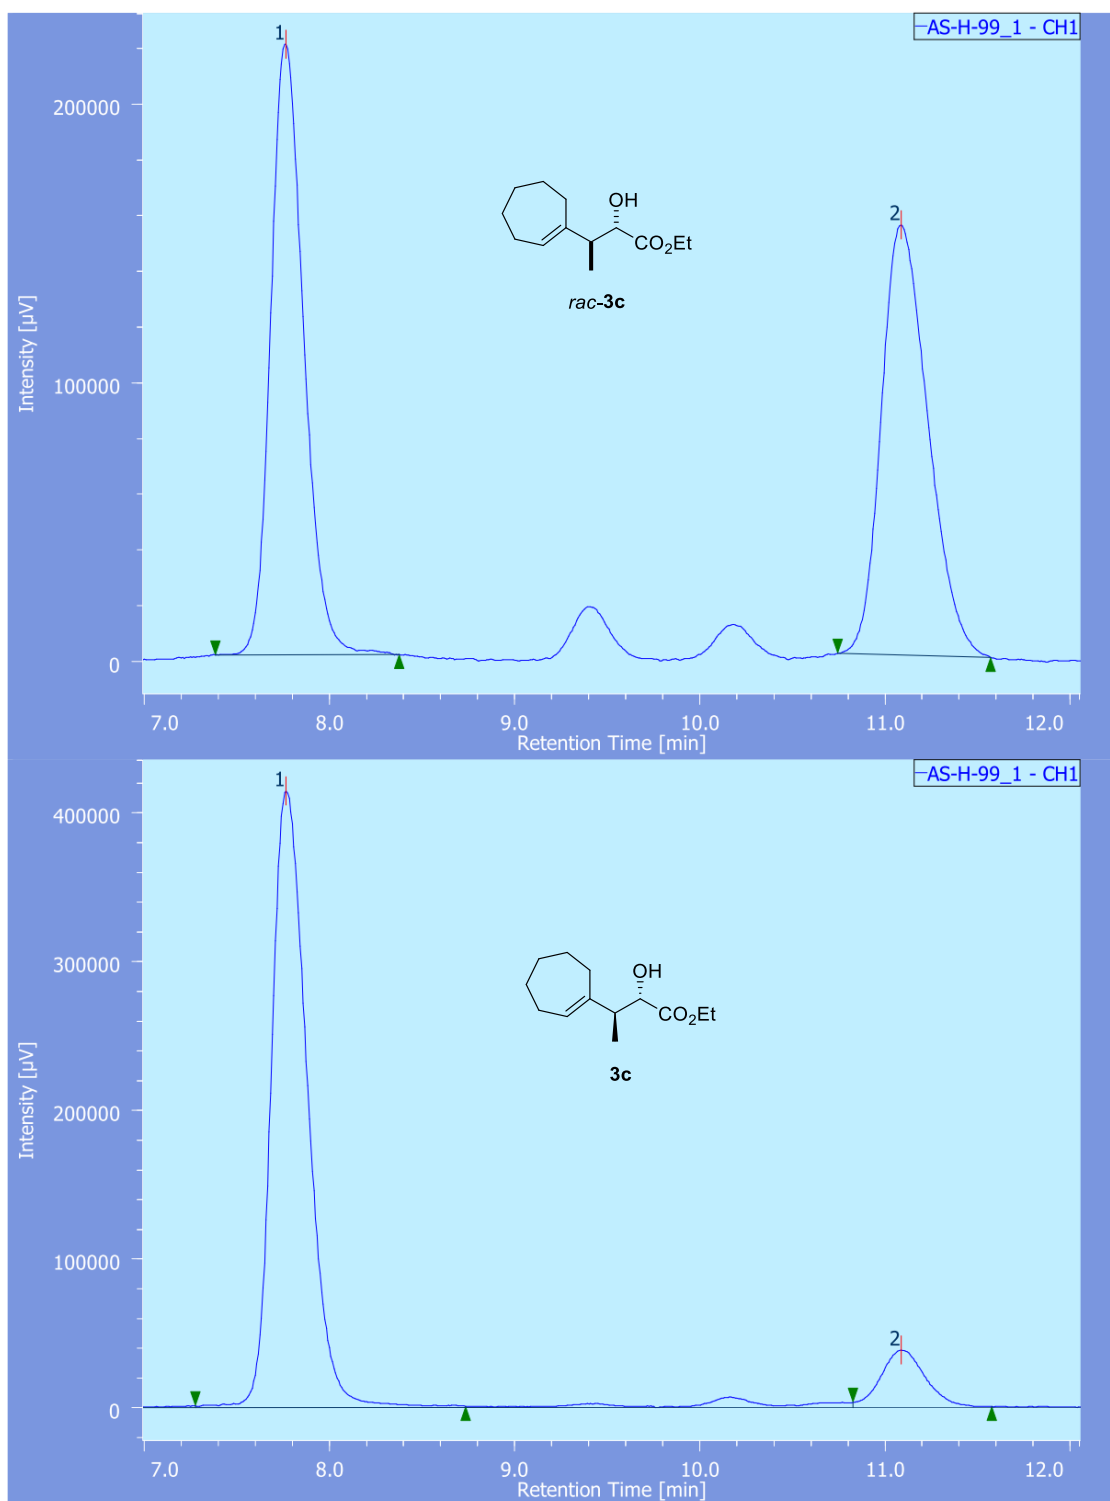

|                        | Retention time (1) | Retention time (2) | Area (1) | Area (2) | % Area (1) | % Area (2) |
|------------------------|--------------------|--------------------|----------|----------|------------|------------|
| <i>rac</i> - <b>3c</b> | 7.8                | 11.1               | 2718633  | 2706062  | 50.1       | 49.9       |
| <b>3c</b>              | 7.8                | 11.1               | 5605263  | 643648   | 89.7       | 10.3       |

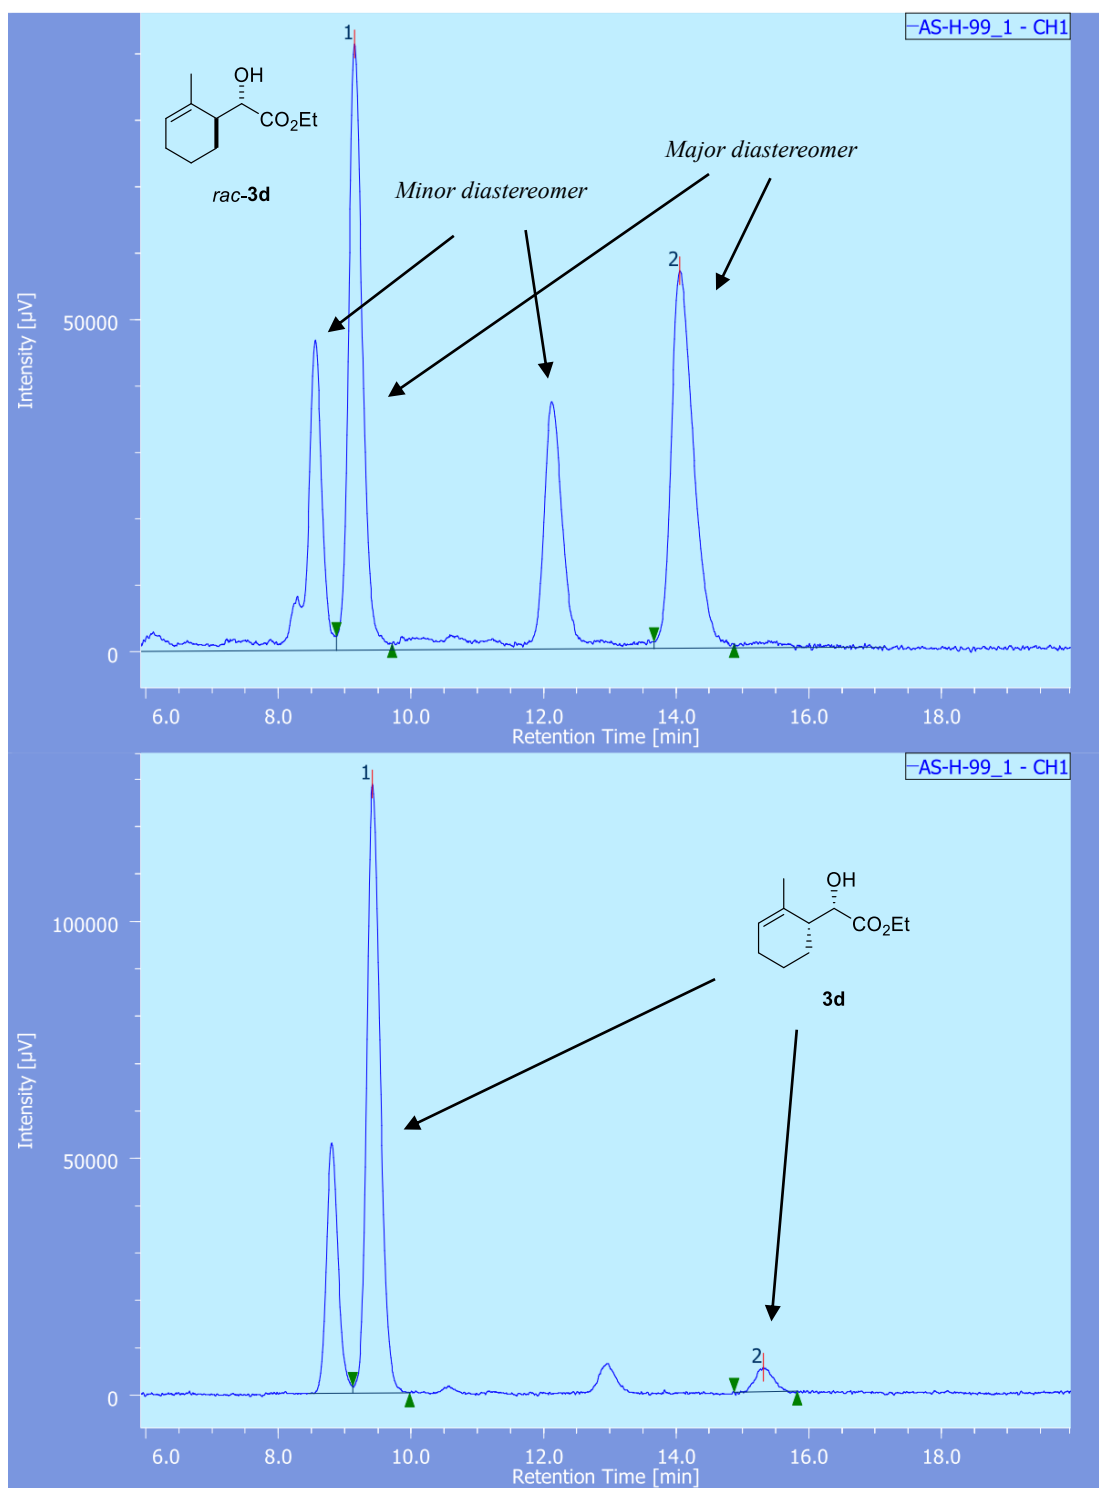

|                | Retention time (1) | Retention time (2) | Area (1) | Area (2) | % Area (1) | % Area (2) |
|----------------|--------------------|--------------------|----------|----------|------------|------------|
| <i>rac</i> -3d | 9.1                | 14.1               | 1317089  | 1325345  | 49.8       | 50.2       |
| 3d             | 9.4                | 15.3               | 1802997  | 96311    | 94.9       | 5.1        |

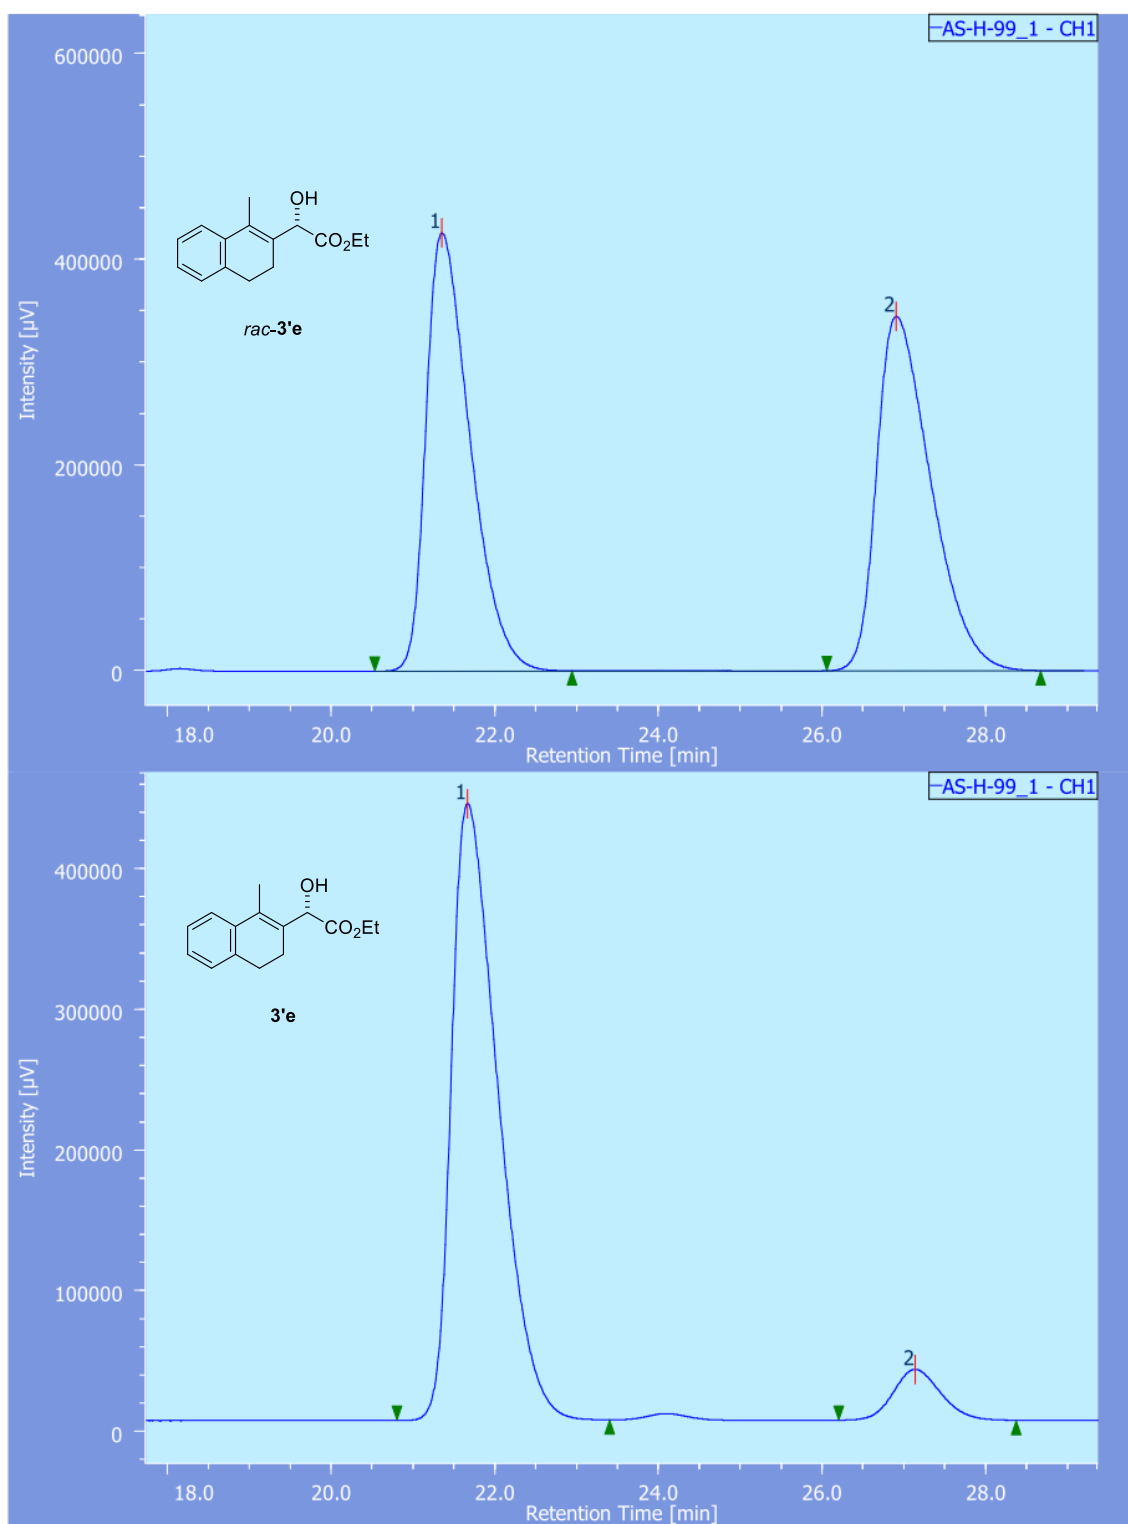

|                | Retention time (1) | Retention time (2) | Area (1) | Area (2) | % Area (1) | % Area (2) |
|----------------|--------------------|--------------------|----------|----------|------------|------------|
| <i>rac-3'e</i> | 21.4               | 26.9               | 15957340 | 15913035 | 50.0       | 50.0       |
| <i>3'e</i>     | 21.7               | 27.1               | 17358285 | 1468132  | 92.2       | 7.8        |

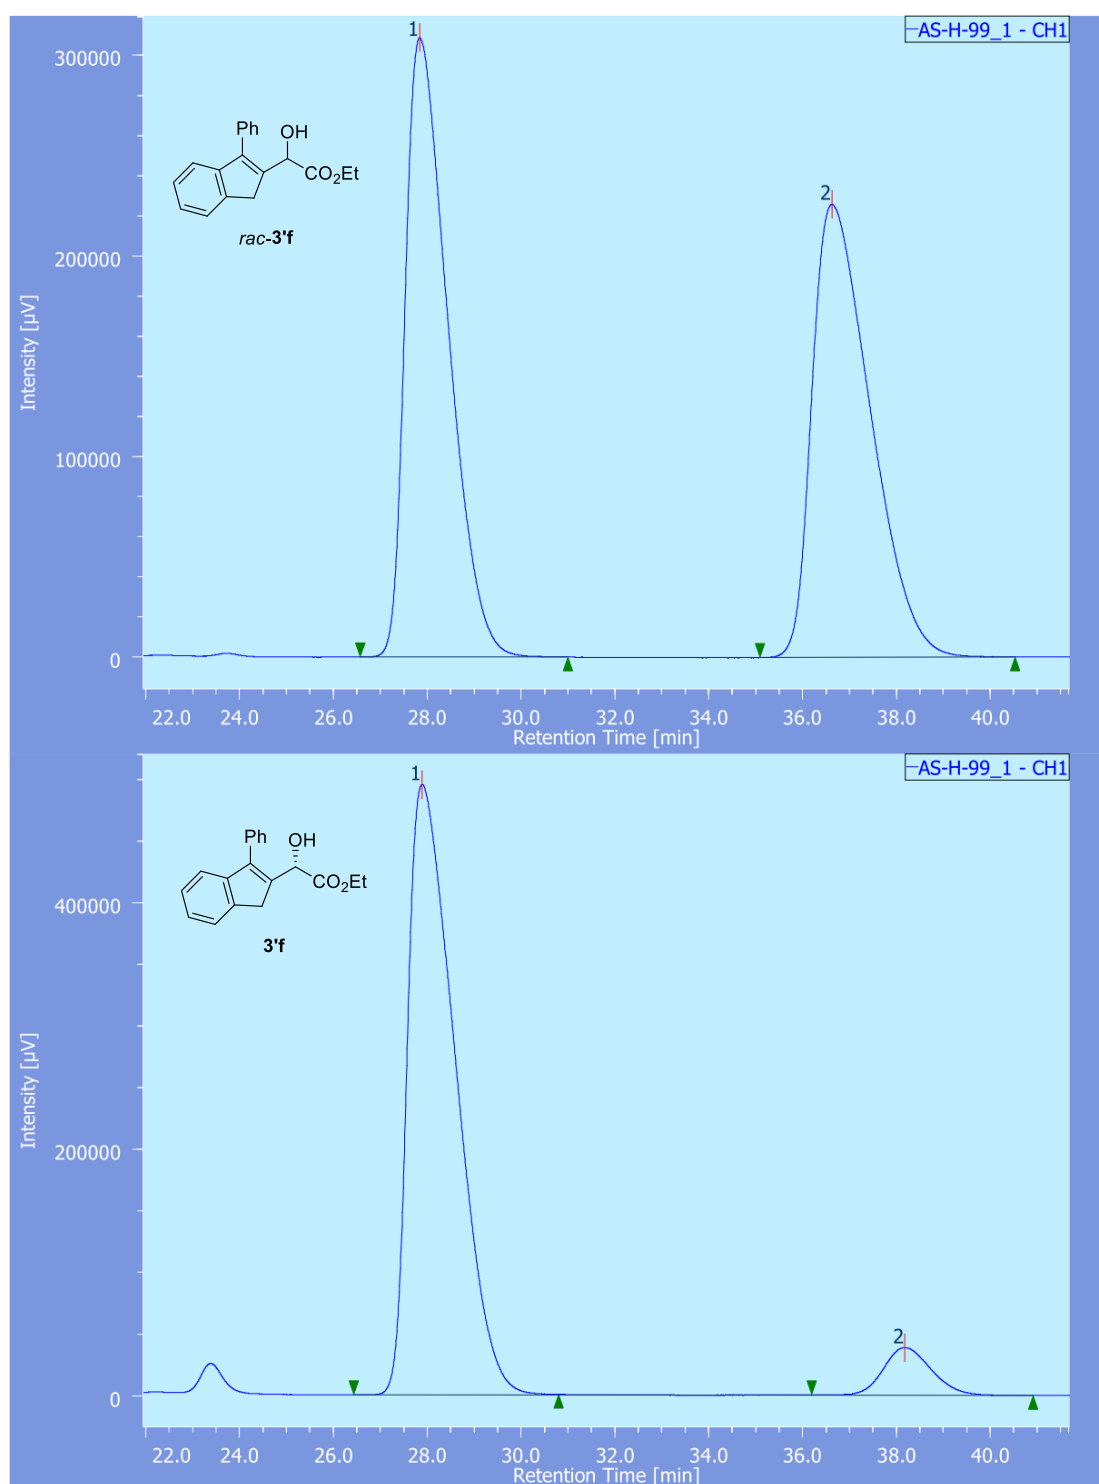

|                         | Retention time (1) | Retention time (2) | Area (1) | Area (2) | % Area (1) | % Area (2) |
|-------------------------|--------------------|--------------------|----------|----------|------------|------------|
| <i>rac</i> - <b>3'f</b> | 27.8               | 36.6               | 19532278 | 19487740 | 50.1       | 49.9       |
| <b>3'f</b>              | 27.9               | 38.2               | 34671443 | 2769387  | 92.6       | 7.4        |

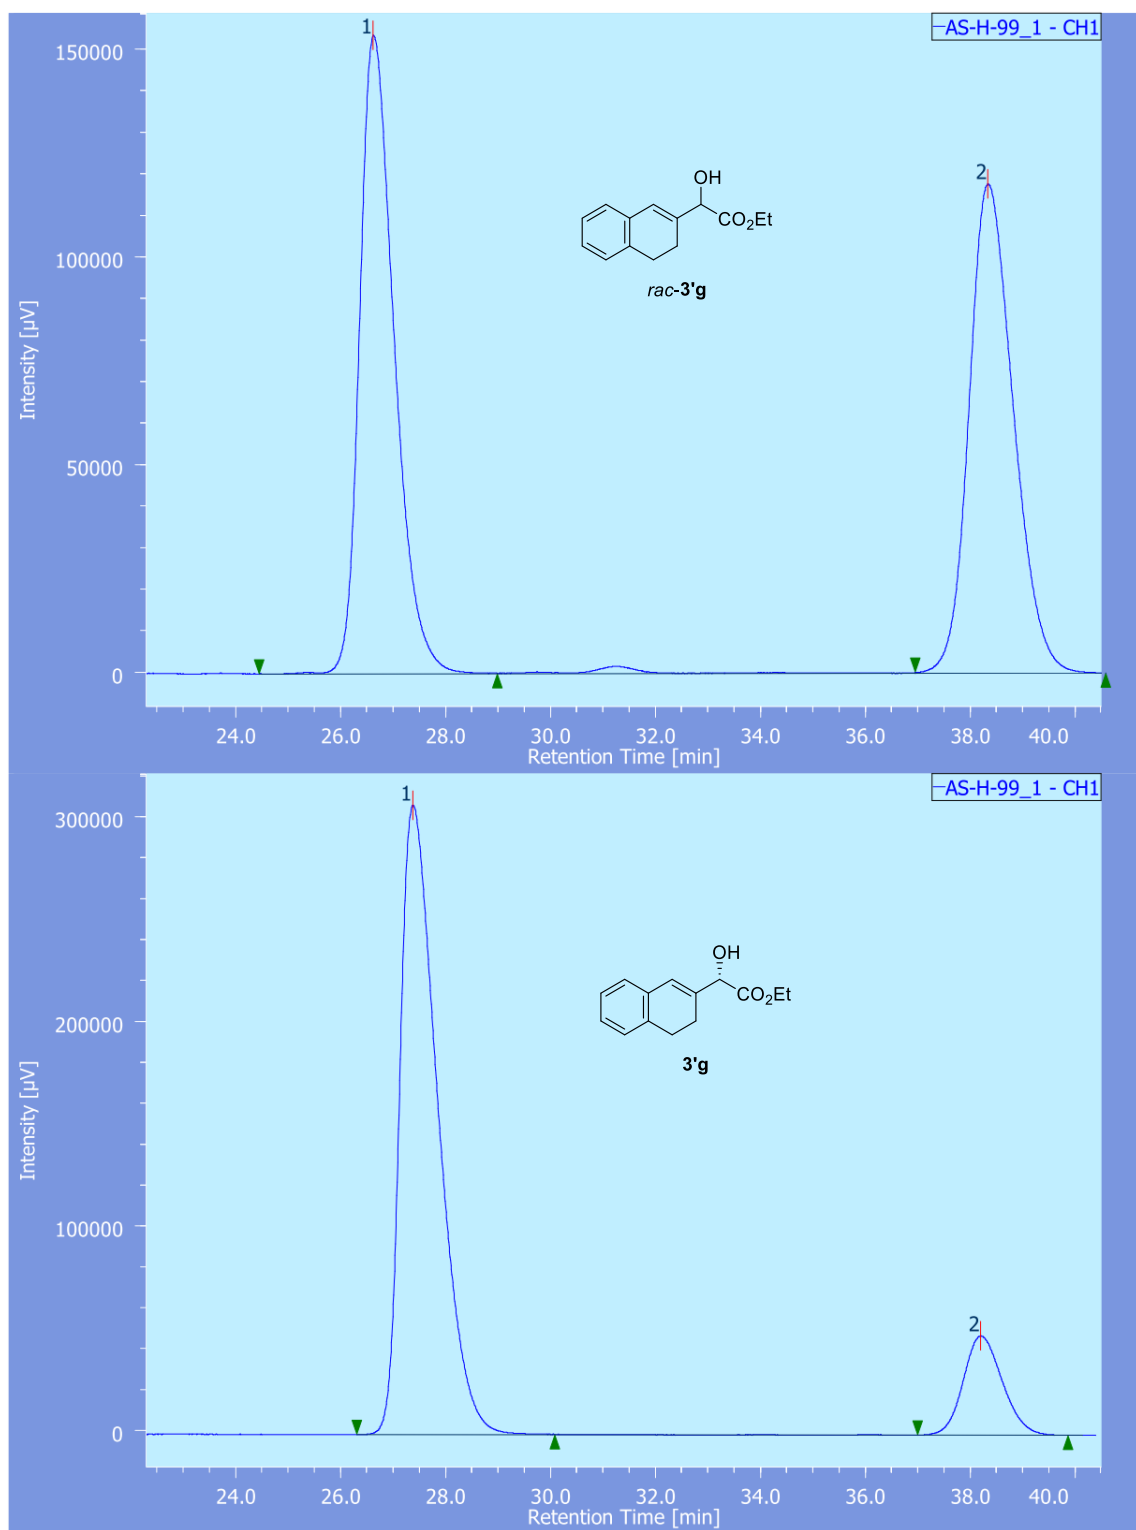

|                 | Retention time (1) | Retention time (2) | Area (1) | Area (2) | % Area (1) | % Area (2) |
|-----------------|--------------------|--------------------|----------|----------|------------|------------|
| <i>rac</i> -3'g | 26.6               | 38.3               | 6993023  | 6914226  | 50.3       | 49.7       |
| 3'g             | 27.4               | 38.2               | 15334990 | 2510944  | 85.9       | 14.1       |

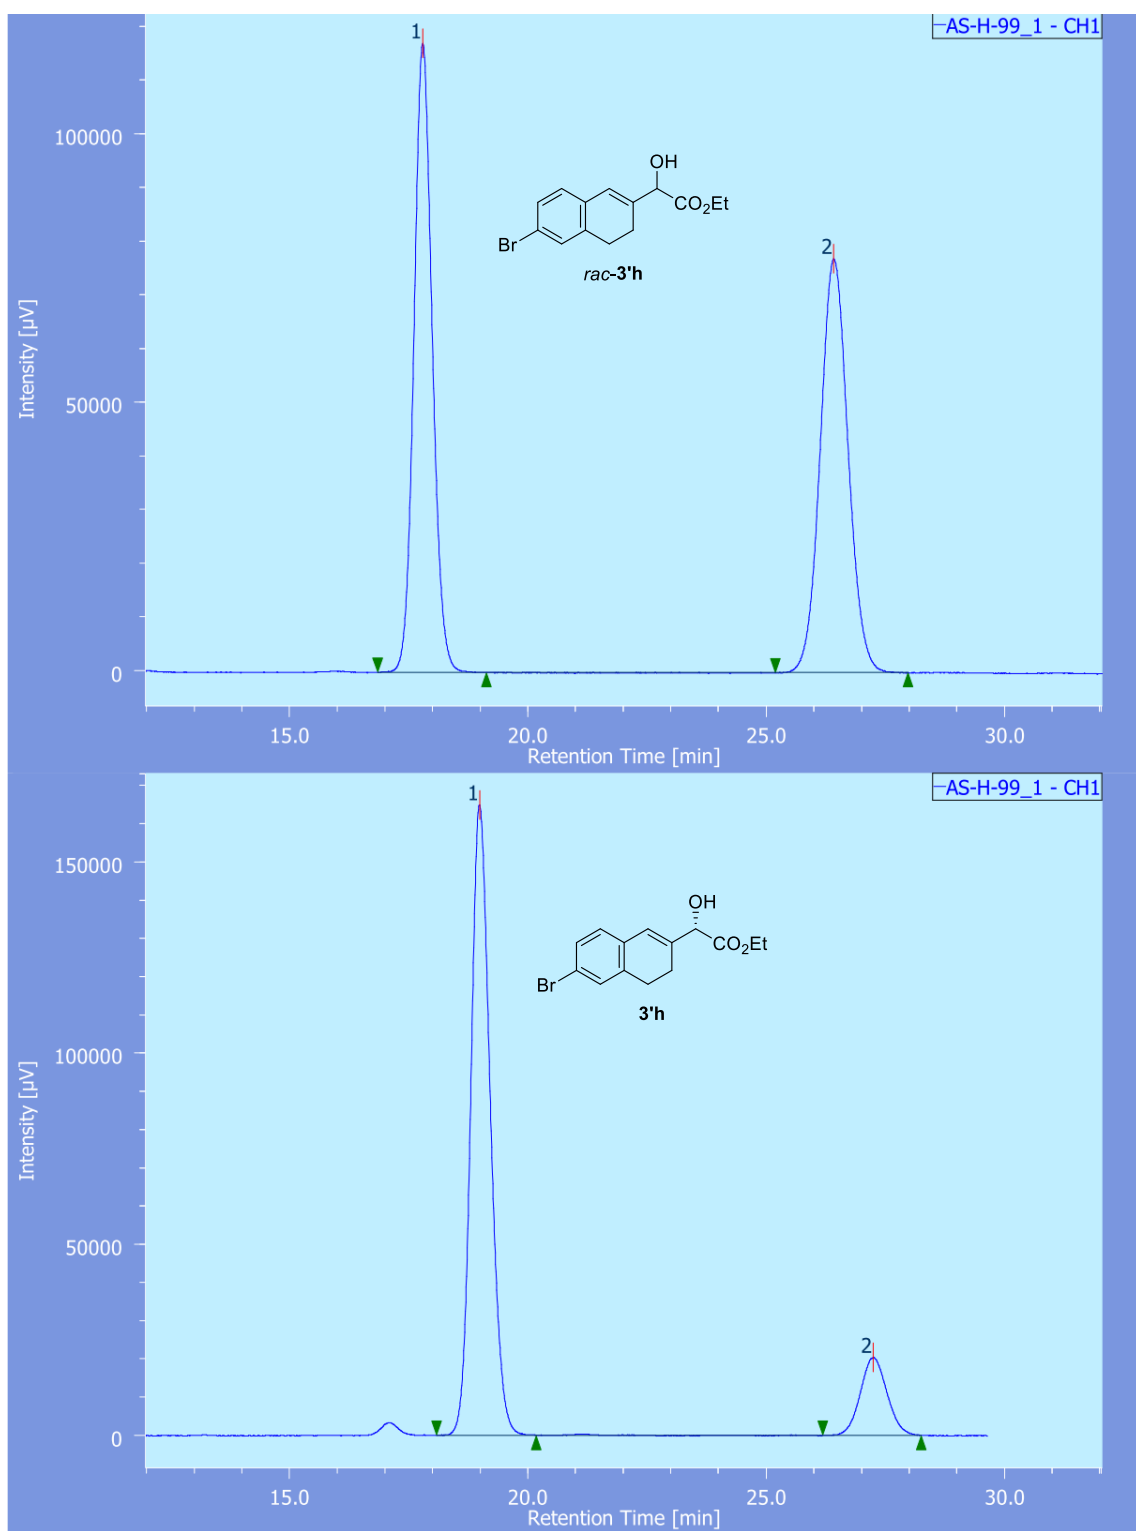

|                 | Retention time (1) | Retention time (2) | Area (1) | Area (2) | % Area (1) | % Area (2) |
|-----------------|--------------------|--------------------|----------|----------|------------|------------|
| <i>rac</i> -3'h | 17.8               | 26.4               | 3125272  | 3125360  | 50.0       | 50.0       |
| 3'h             | 19.0               | 27.2               | 4654914  | 788503   | 85.5       | 14.5       |

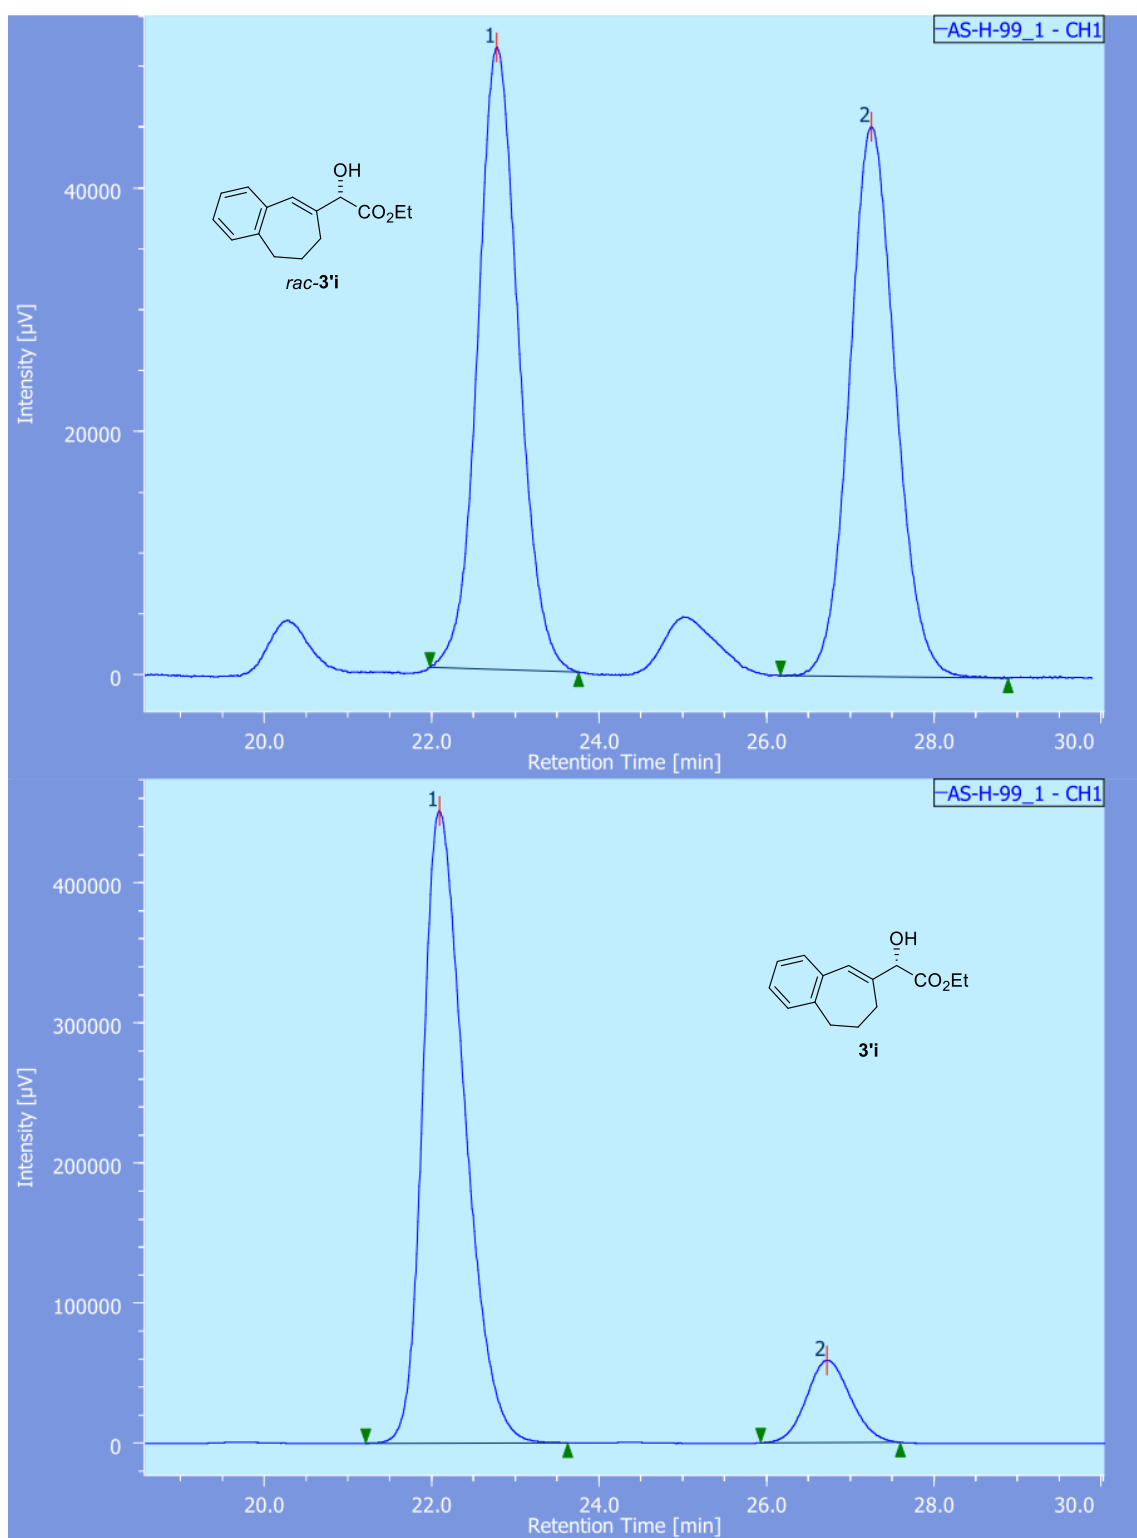

|                         | Retention time (1) | Retention time (2) | Area (1) | Area (2) | % Area (1) | % Area (2) |
|-------------------------|--------------------|--------------------|----------|----------|------------|------------|
| <i>rac</i> - <b>3'i</b> | 22.7               | 27.2               | 1730811  | 1722753  | 50.1       | 49.9       |
| <b>3'i</b>              | 22.1               | 26.7               | 15699141 | 2147896  | 88.0       | 12.0       |

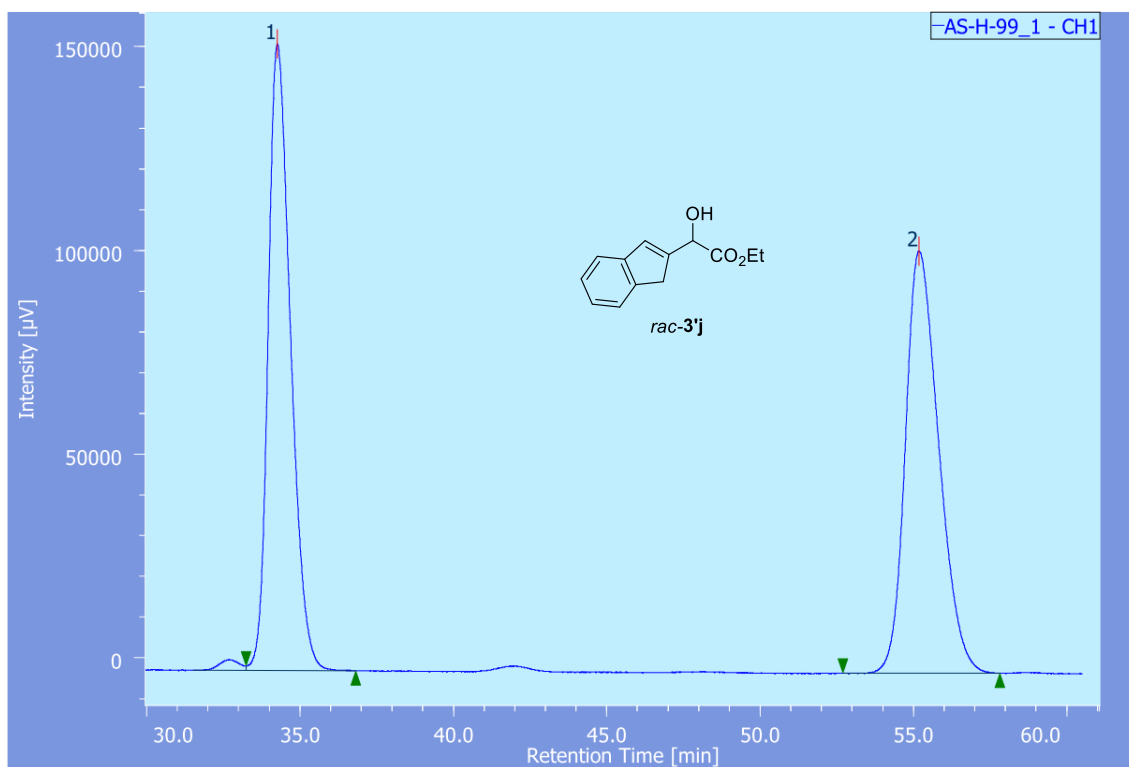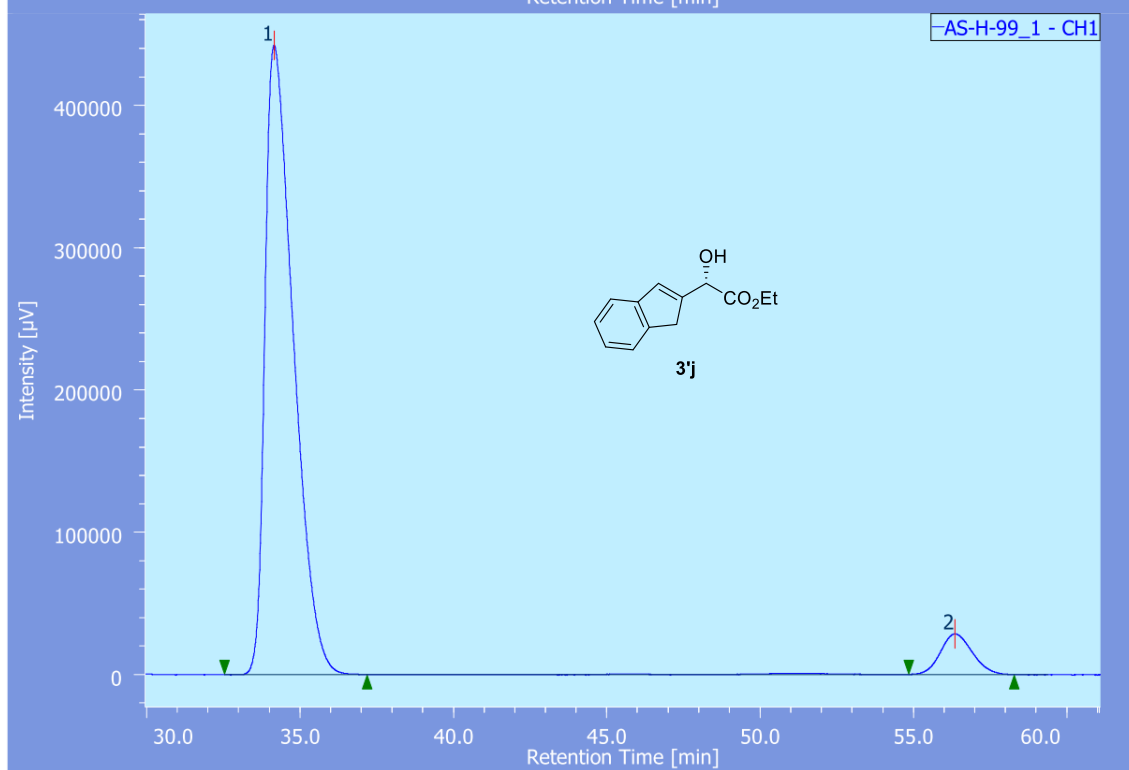

|                | Retention time (1) | Retention time (2) | Area (1) | Area (2) | % Area (1) | % Area (2) |
|----------------|--------------------|--------------------|----------|----------|------------|------------|
| <i>rac-3'j</i> | 34.2               | 55.2               | 7800559  | 7834443  | 49.9       | 50.1       |
| <b>3'j</b>     | 34.2               | 56.3               | 28499751 | 2109903  | 93.1       | 6.9        |

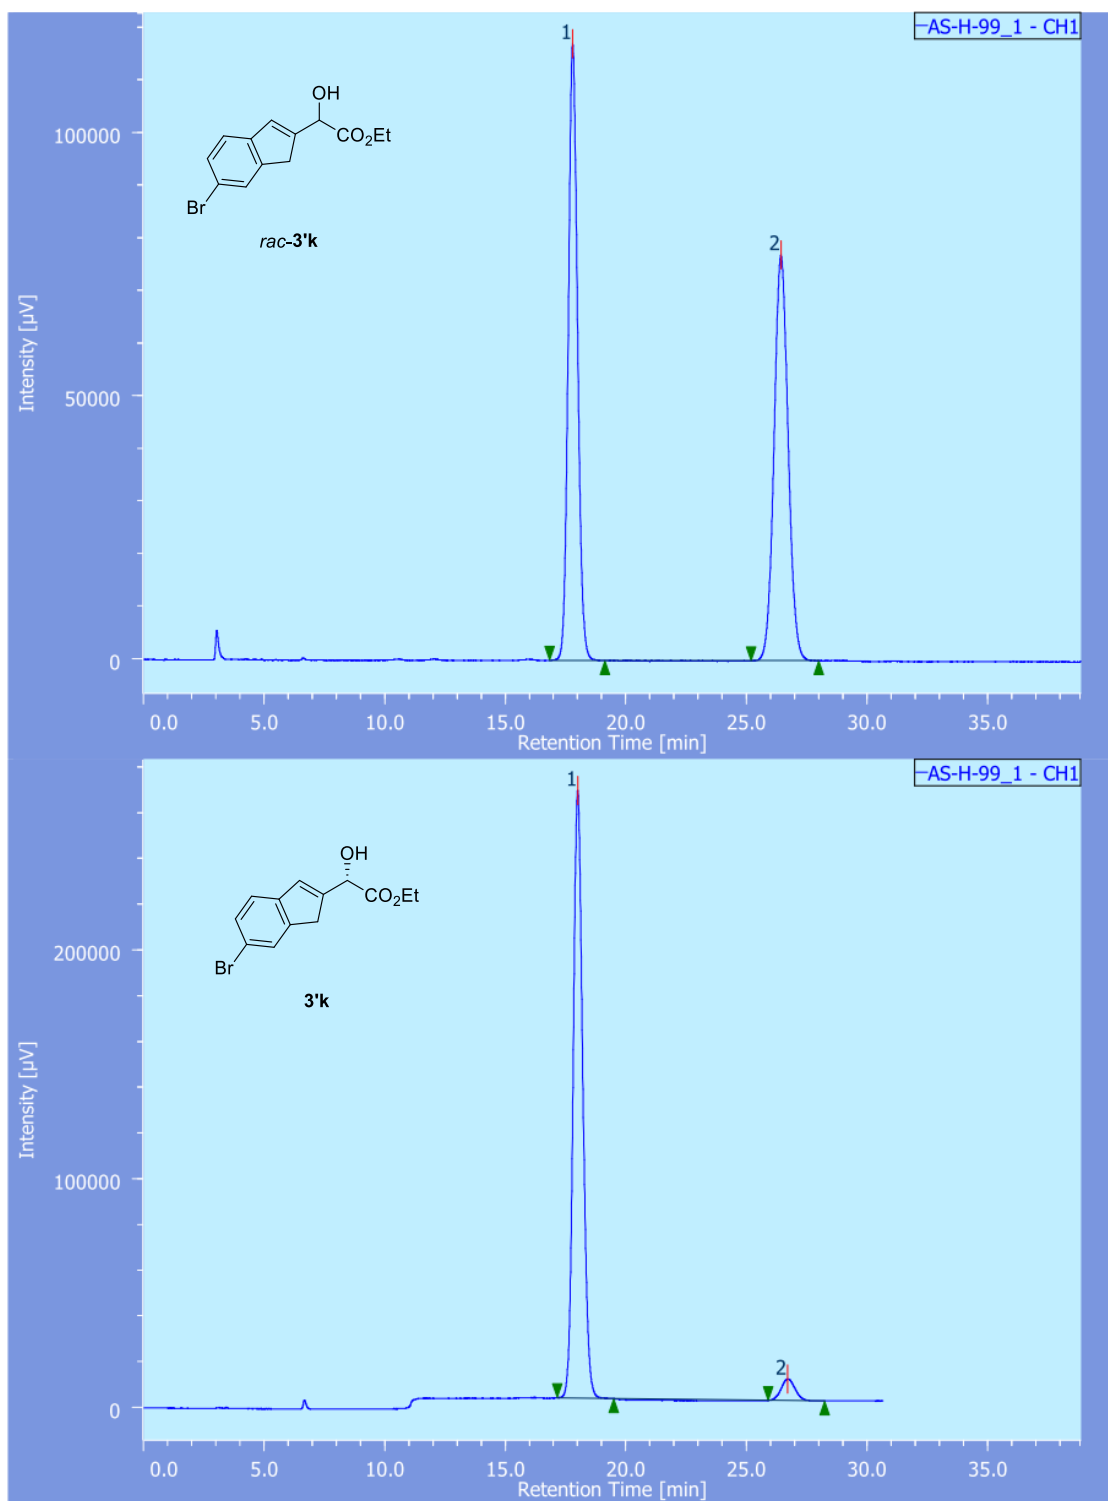

|                | Retention time (1) | Retention time (2) | Area (1) | Area (2) | % Area (1) | % Area (2) |
|----------------|--------------------|--------------------|----------|----------|------------|------------|
| <i>rac-3'k</i> | 17.8               | 26.4               | 3125272  | 3125360  | 50.0       | 50.0       |
| <b>3'k</b>     | 18.0               | 26.7               | 7316440  | 378935   | 95.1       | 4.9        |
